# Supplementary material for: Modeling transcriptional regulation of model species with deep learning
Source: HighWire-hosted journal article supplement (doi:10.1101/gr.266171.120), 2021-04-22
Supplement: Supplemental_Material.pdf [file Supplemental_Material.pdf]

# Supplemental Material for

## Modeling transcriptional regulation of model species with deep learning

Evan M. Cofer, João Raimundo, Alicja Tadych, Yuji Yamazaki, Aaron K. Wong, Chandra L. Theesfeld, Michael S. Levine, and Olga G. Troyanskaya

### List of Supplemental Figures:

|                                  |    |
|----------------------------------|----|
| Supplemental Figure S1 . . . . . | 2  |
| Supplemental Figure S2 . . . . . | 3  |
| Supplemental Figure S3 . . . . . | 4  |
| Supplemental Figure S4 . . . . . | 5  |
| Supplemental Figure S5 . . . . . | 6  |
| Supplemental Figure S6 . . . . . | 7  |
| Supplemental Figure S7 . . . . . | 8  |
| Supplemental Figure S8 . . . . . | 9  |
| Supplemental Figure S9 . . . . . | 10 |

### List of Supplemental Tables:

|                                  |    |
|----------------------------------|----|
| Supplemental Table S7 . . . . .  | 11 |
| Supplemental Table S9 . . . . .  | 11 |
| Supplemental Table S13 . . . . . | 11 |

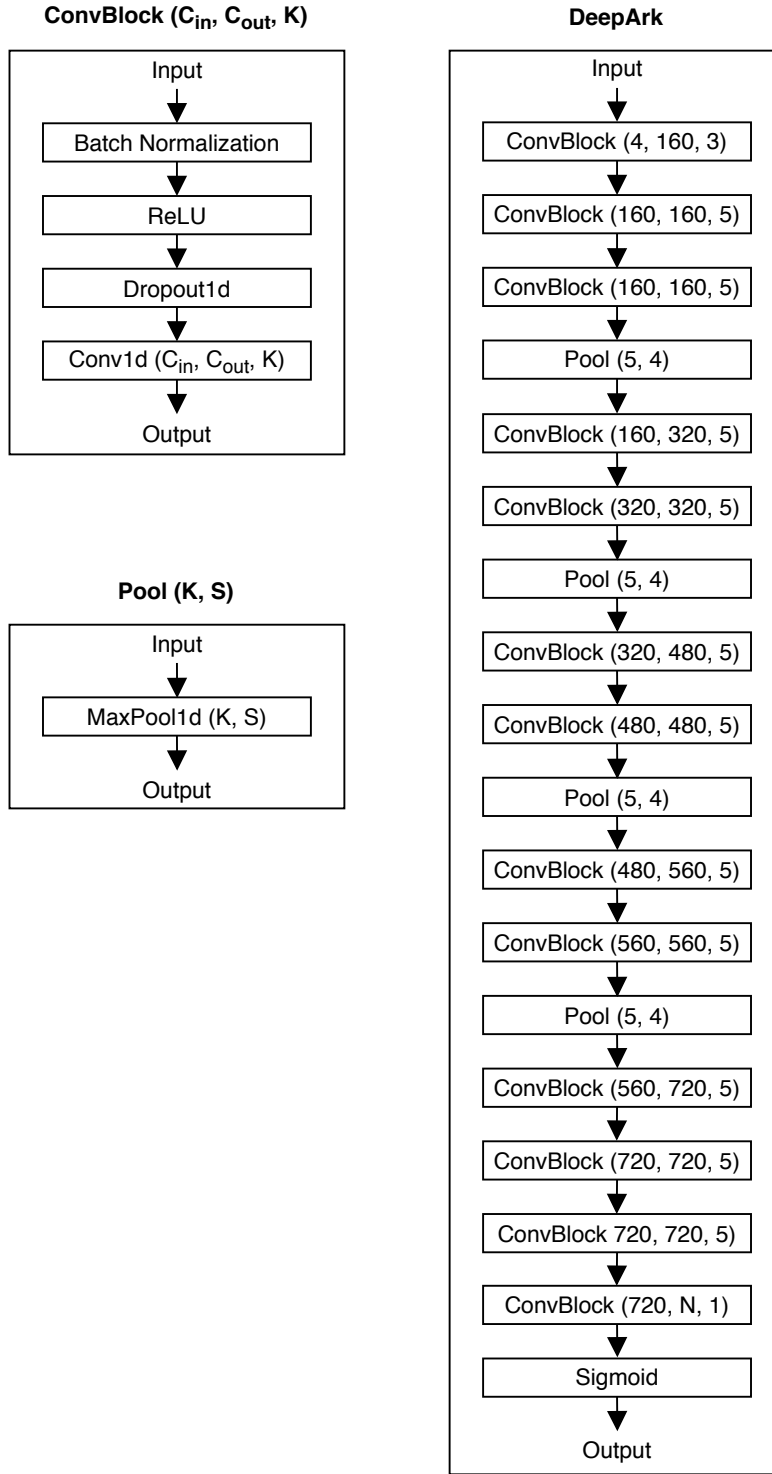

**Supplemental Figure S1: Overview of the DeepArk model architecture.** Convolutional blocks have  $C_{in}$  input channels,  $C_{out}$  output channels, and a kernel size of  $K$ . Pooling blocks have a kernel size of  $K$  and a stride of  $S$ . The dropout rate used by the spatial dropout layers during training varied according to species (**Supplemental Table S7**).

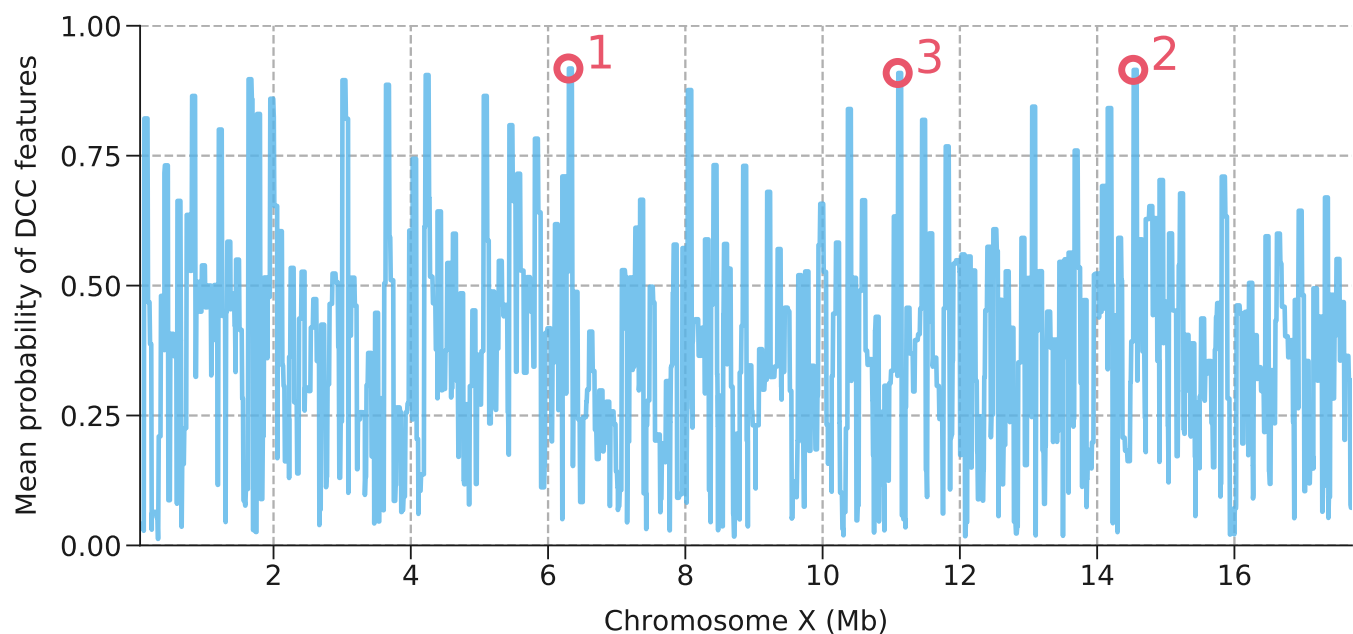

**Supplemental Figure S2: DCC-bound regions of the *C. elegans* X Chromosome as predicted by DeepArk.**

The mean probability of DCC features (**Supplemental Table S3**) throughout the X Chromosome of *C. elegans*. To enhance readability, we plot the maximum value per 50 Kb bin of the chromosome. The positions with the largest (ce11:ChrX:6294496-6298590), second largest (ce11:ChrX:14523896-14527990), and third largest (ce11:ChrX:11092096-11096190) predicted probabilities are marked with red circles and labeled with their rank.

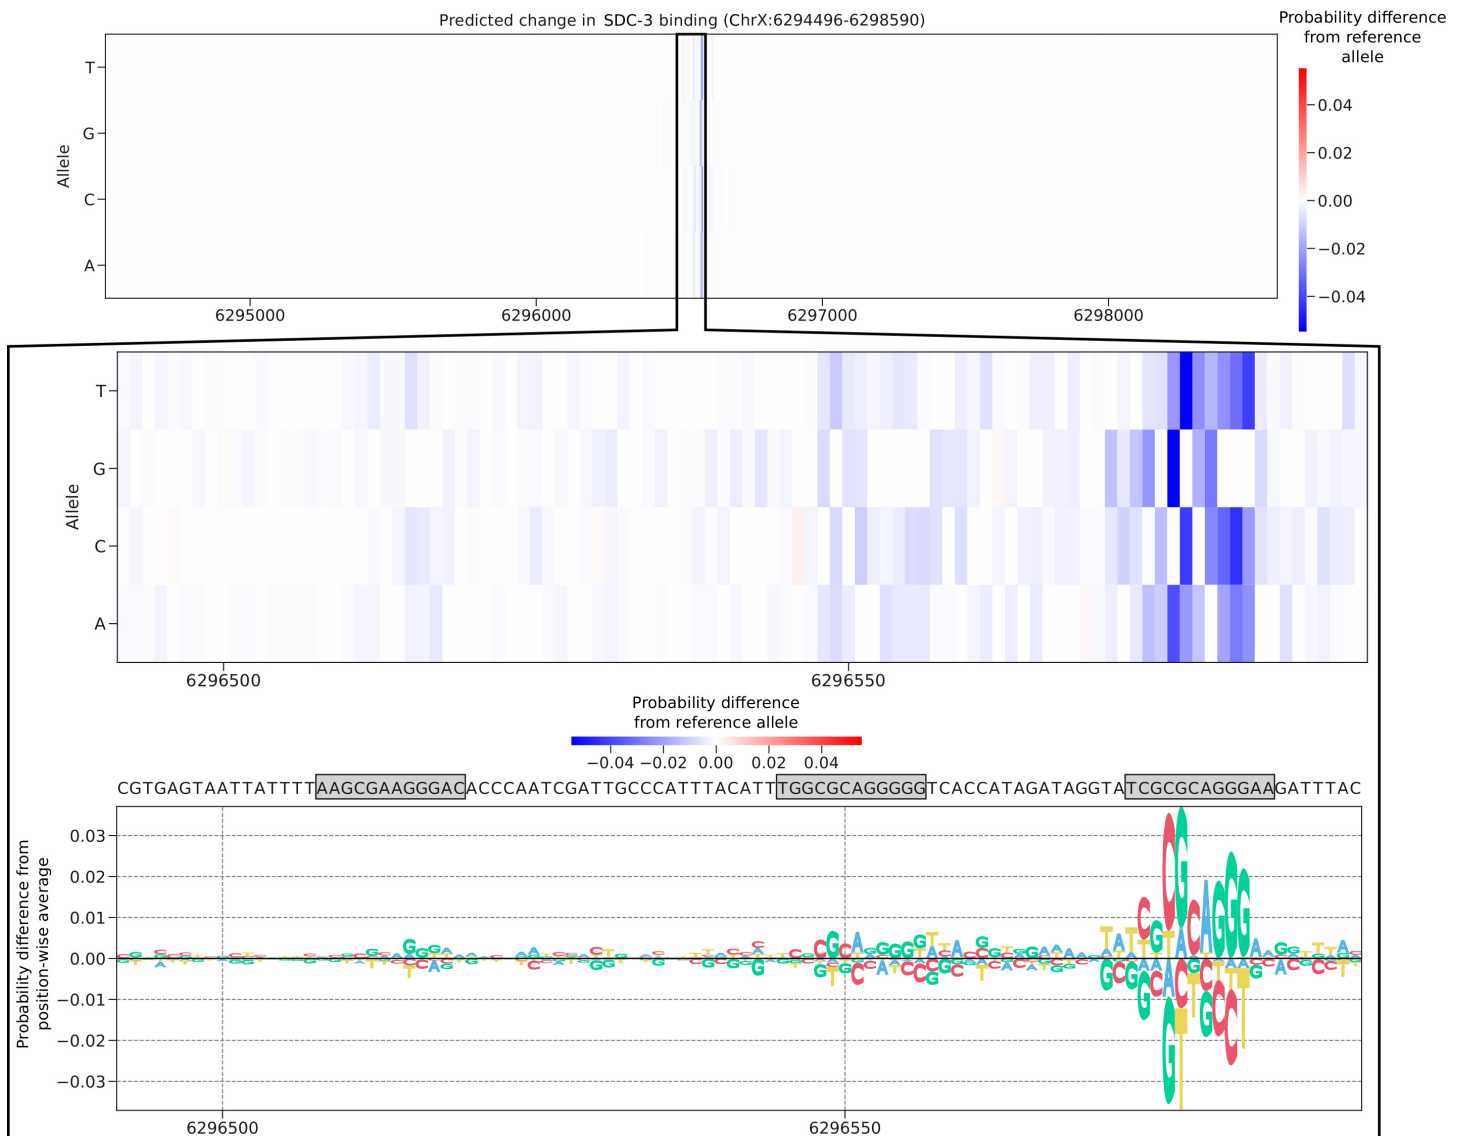

**Supplemental Figure S3: *In silico* saturated mutagenesis applied to the first high-confidence DCC binding site in *C. elegans*.** In the top panel, we show the predicted effect of every possible SNP in the first high-confidence DCC binding site (ce11:ChrX:6294496-6298590) on the probability of SDC-3 binding (accession no. SRX2228883) relative to the prediction for the reference sequence for all positions in the 4095 bp input sequence. The middle panel is the same as the top panel, except zoomed in on the most critical 100 bp at the center of the sequence. The bottom panel is also zoomed in on the most critical 100 bp at the center of the sequence, but the score for a particular variant in this panel is visualized as the difference between the predicted probability for the sequence containing that variant and the mean predicted probability of all alleles at the same position. For clarity, the reference sequence is shown along the top of the bottom panel. The positions in the reference sequence that contain significant matches for the “recruitment elements on X” or “*rex*” motif (Jans et al. 2009) are outlined. If a significant match occurs on the forward strand, the box has a light grey fill, otherwise it has a transparent fill. Note that the right-most motif hit contains a near-perfect match (TCGCGCAGGGAA) to the *rex* consensus sequence, and appears highly predictive of SDC-3 binding. Mutations at this site also appear to greatly diminish the predicted probability of SDC-3 binding. The other *rex* motif hits (AAGCGAAGGGAC on the left, and TGGCGCAGGGGG in the middle) deviate more from the canonical *rex* motif, and appear less critical to SDC-3 binding than the right-most one.

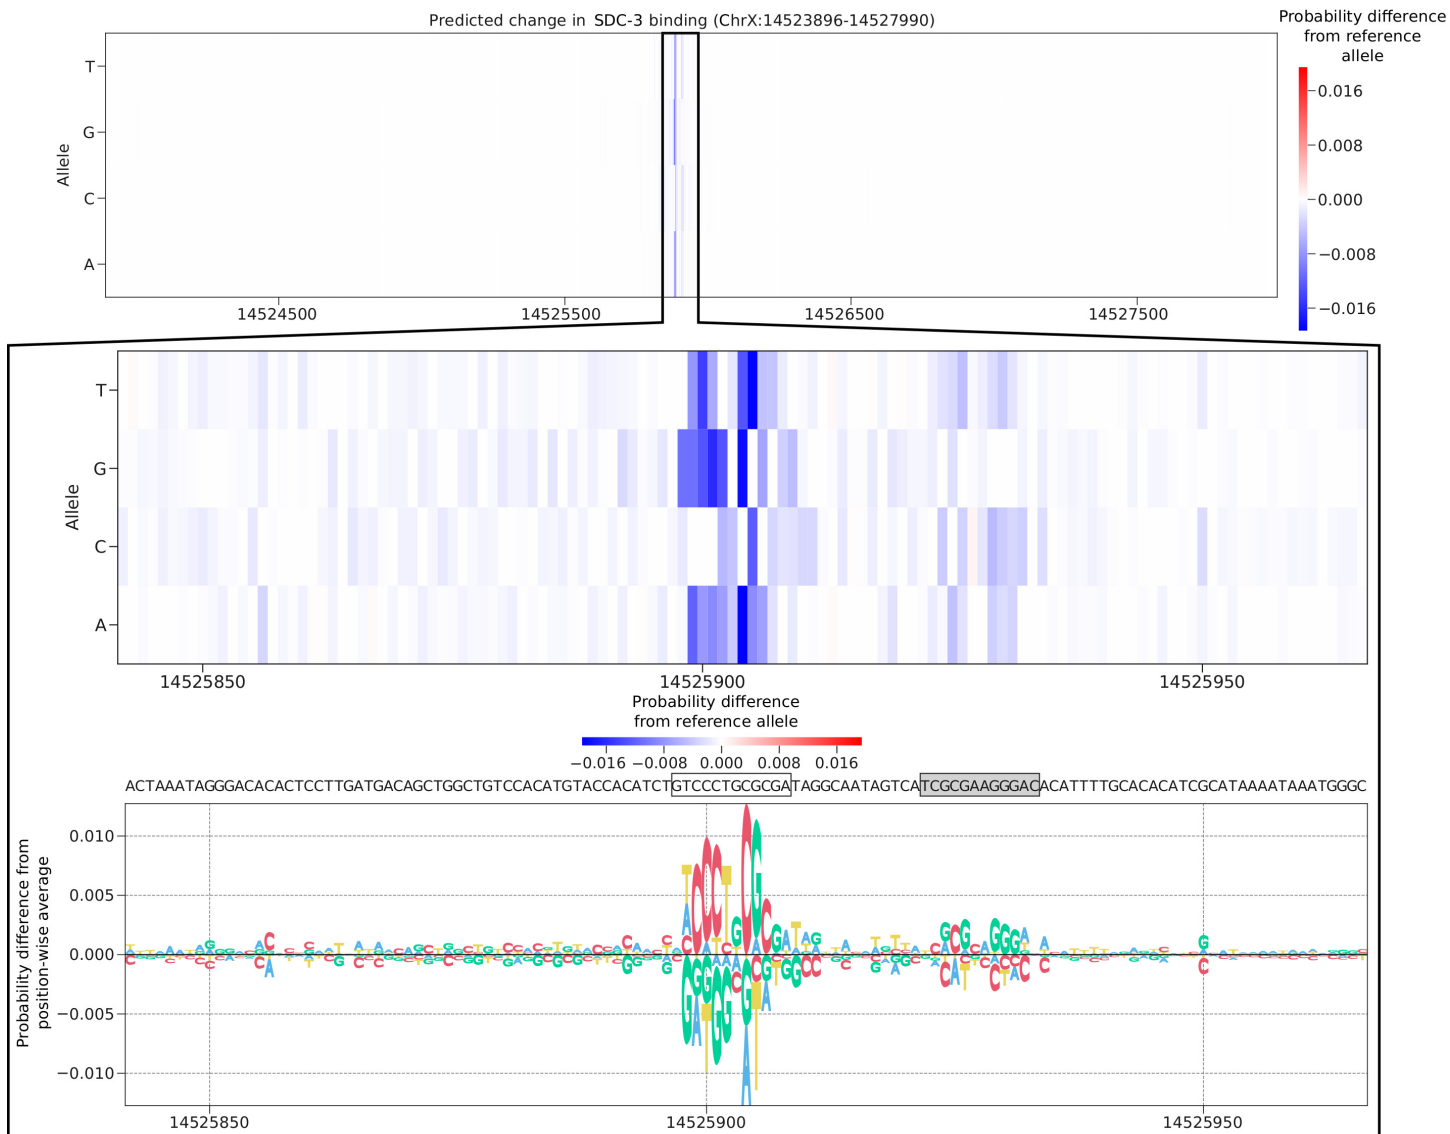

**Supplemental Figure S4: *In silico* saturated mutagenesis applied to the second high-confidence DCC binding site in *C. elegans*.** In the top panel, we show the predicted effect of every possible SNP in the second high-confidence DCC binding site (ce11:ChrX:14523896-14527990) on the probability of SDC-3 binding (accession no. SRX2228883) relative to the prediction for the reference sequence for all positions in the 4095 bp input sequence. The middle panel is the same as the top panel, except zoomed in on the most critical region of 125 bp near the center of the sequence. The bottom panel is also zoomed in on the most critical 125 bp near the center of the sequence, but the score for a particular variant in this panel is visualized as the difference between the predicted probability for the sequence containing that variant and the mean predicted probability of all alleles at the same position. Additionally, the reference sequence is shown along the top of the bottom panel. The positions in the reference sequence that contain significant hits for the “recruitment elements on X” or “*rex*” motif (Jans et al. 2009) are outlined. If a significant hit occurs on the forward strand, the box has a light grey fill, otherwise it has a transparent fill. The left (TCGCGCAGGGAC on the reverse strand) and right (TCGGAAGGGAC) *rex* motif hits appear important to SDC-3 binding.

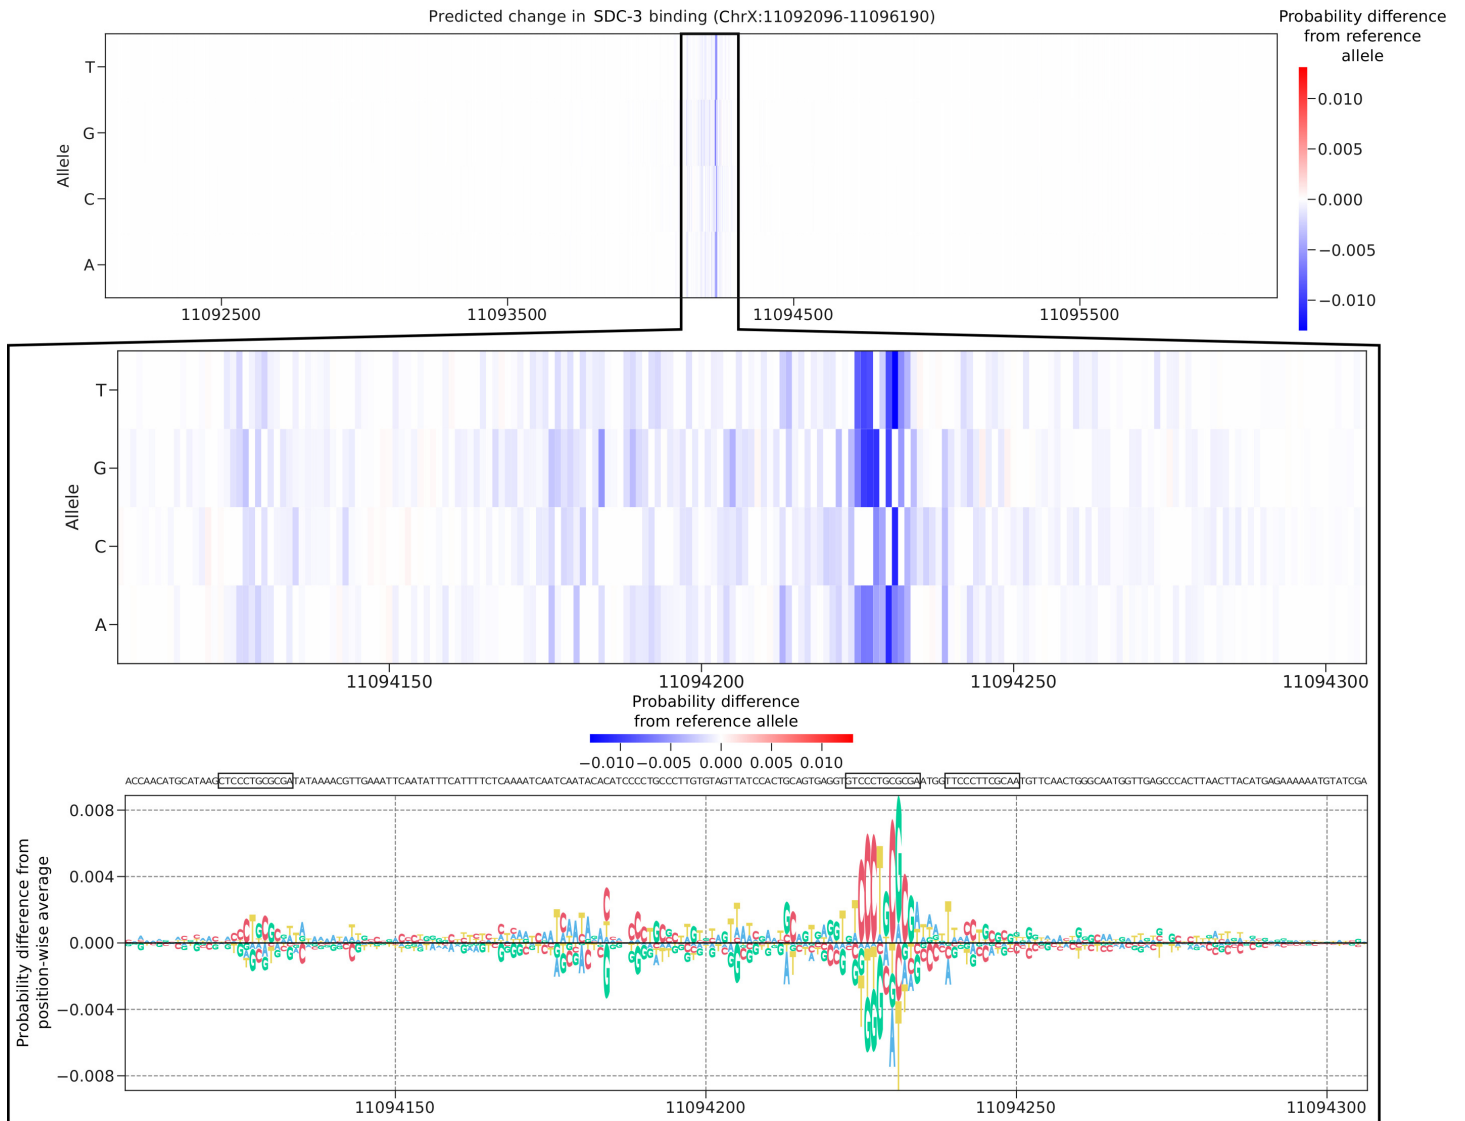

**Supplemental Figure S5: *In silico* saturated mutagenesis applied to the third high-confidence DCC binding site in *C. elegans*.** In the top panel, we show the predicted effect of every possible SNP in the third high-confidence DCC binding site (ce11:ChrX:11092096-11096190) on the probability of SDC-3 binding (accession no. SRX2228883) relative to the prediction for the reference sequence for all positions in the 4095 bp input sequence. The middle panel is the same as the top panel, except zoomed in on the most critical region of 200 bp near the center of the sequence. The bottom panel is also zoomed in on the most critical 200 bp near the center of the sequence, but the score for a particular variant in this panel is visualized as the difference between the predicted probability for the sequence containing that variant and the mean predicted probability of all alleles at the same position. For clarity, the reference sequence is shown along the top of the bottom panel. The positions in the reference sequence that contain significant hits for the “recruitment elements on X” or “*rex*” motif (Jans et al. 2009) are outlined. If a significant hit occurs on the forward strand, the box has a light grey fill, otherwise it has a transparent fill. Reading from left to right, the first *rex* motif hit (TCGCGCAGGGAG on the reverse strand) is a perfect match to the consensus sequence. The second *rex* motif hit (TCGCGCAGGGAC on the reverse strand) is a near perfect match, while the third *rex* motif hit (TTGCGAAGGGAA on the reverse strand) is more degenerate. Nevertheless, the clustered second and third hits appear highly predictive of SDC-3 binding, which is consistent with existing literature showing that closely spaced *rex* sites result in improved DCC localization (McDonel et al. 2006).



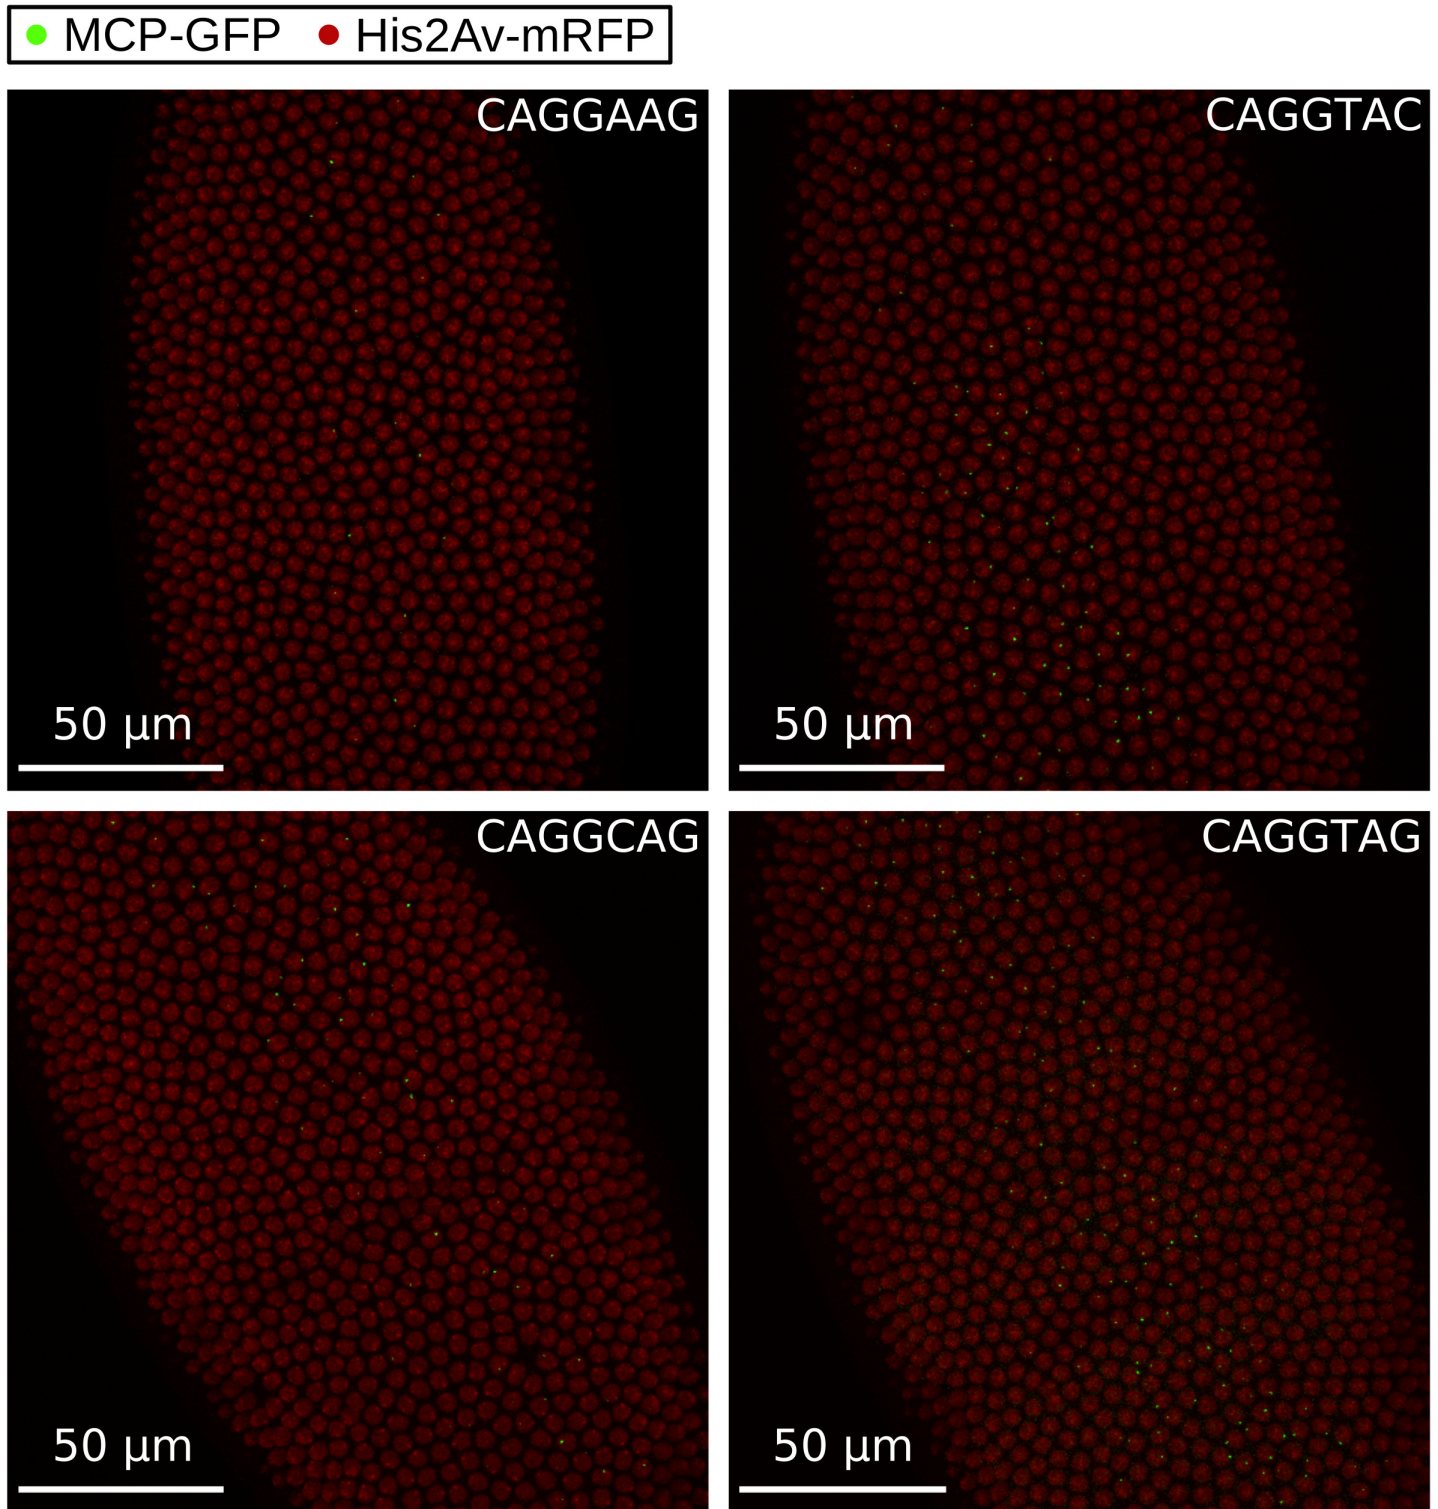

**Supplemental Figure S6: Live imaging of the *T48* mesodermal enhancer.** Fluorescence microscopy of *Drosophila* embryos during minute 20 of nuclear cycle 14 showing active transcription of the *T48* mesodermal enhancer, and illustrates the different levels of transcriptional activation driven by the different alleles. These are the raw versions of the false colored images presented in the main text (**Figure 3C**).

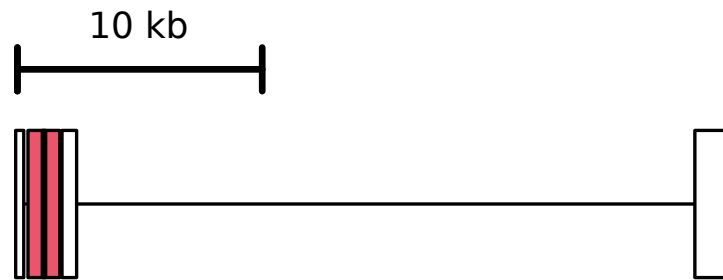

**Supplemental Figure S7: Overview of the *T48* gene.** The *T48* gene (dm6:Chr3R:26881734-26910997) is shown, and the mesodermal enhancer (dm6:Chr3R:26882237-26883537) is drawn as a red box in the first intron. The location of the variants (dm6:Chr3R:26882886-26882889) is visualized as a black vertical line occurring near the center of the enhancer.



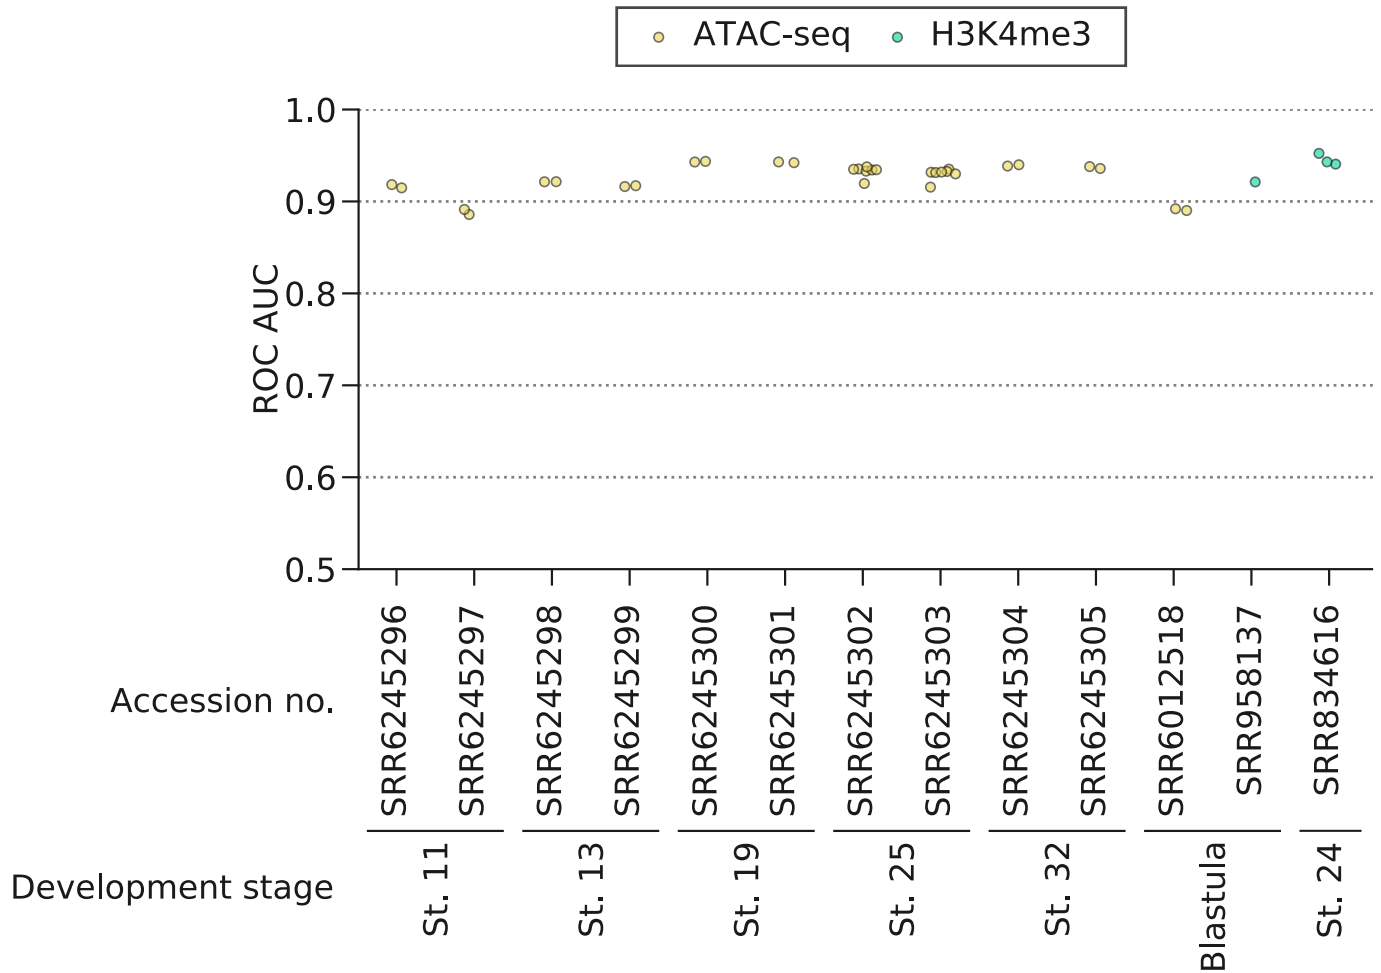

**Supplemental Figure S8: The DeepArk model for *D. rerio* accurately predicts regulatory features in the *O. latipes* genome.** The plot shows DeepArk’s test set performance for *D. rerio*-to-*O. latipes* interspecies regulatory feature prediction, as quantified by the area under the curve (AUC) of the receiver operating characteristic (ROC) curve (**Supplemental Table S6**). The horizontal axis indicates the target regulatory feature in *O. latipes* that we sought to predict with the DeepArk model for *D. rerio*. There are multiple scatter points for each target regulatory feature in *O. latipes* because there is generally more than one *D. rerio* regulatory feature that is comparable to a given *O. latipes* target regulatory feature. For instance, each ATAC-seq experiment from *O. latipes* during Stage 13 (accession numbers SRR6245298 and SRR6245299) would be predicted by each of the two DeepArk regulatory features corresponding to ATAC-seq from *D. rerio* at 13 hpf (accession numbers DCD003087SQ and DCD003090SQ).

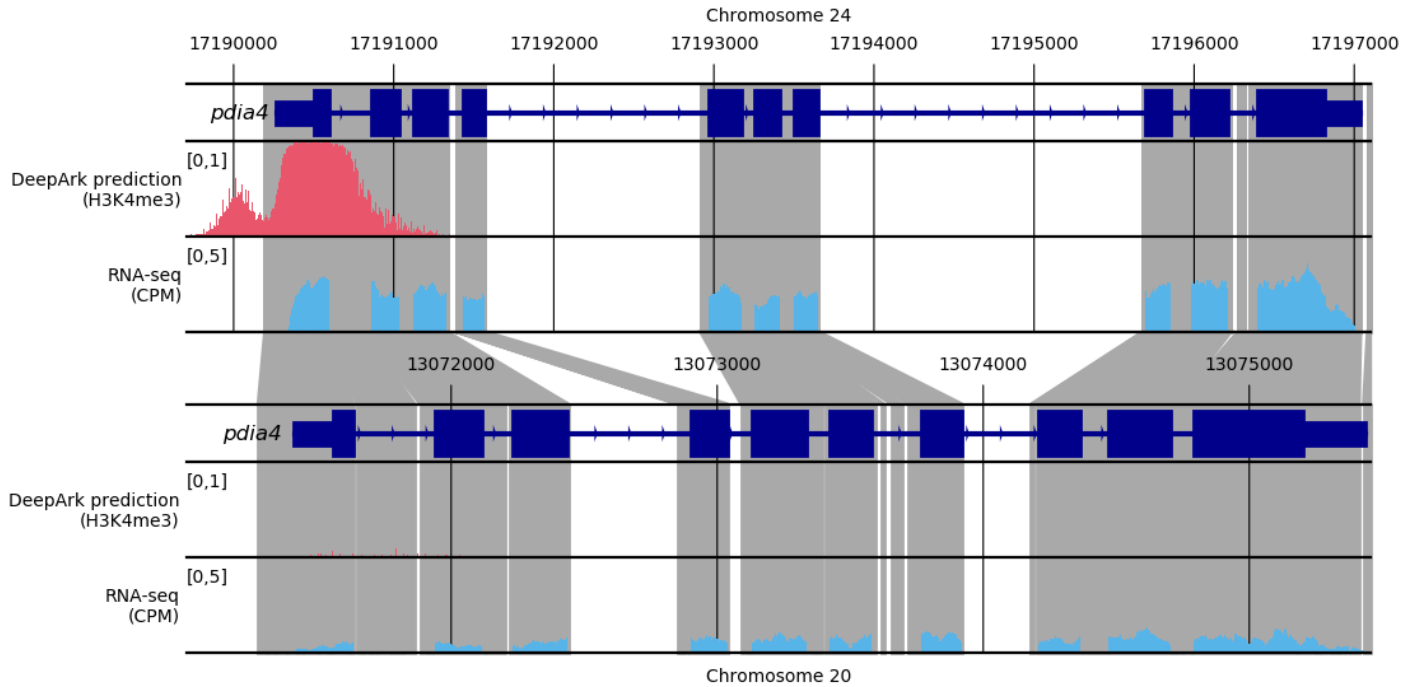

**Supplemental Figure S9: Interspecies predictions with DeepArk indicate diminished *cis*-regulatory activity in *O. latipes* relative to *D. rerio*.** For the *pdia4* gene, which is highly conserved in both *D. rerio* (top) and *O. latipes* (bottom), DeepArk's predictor for H3K4me3 at 6 hpf (accession no. DCD000648SQ) predicts a loss of H3K4me3 at *pdia4*'s promoter in the *O. latipes* genome, which would be associated with diminished or loss of expression at 13 hpf in *O. latipes* (Tena et al. 2014; Marlètaz et al. 2018). Accordingly, normalized coverage counts in RNA-seq from *D. rerio* at 6 hpf and *O. latipes* at 13 hpf show diminished expression of *pdia4* in *O. latipes* relative to *D. rerio*. CPM, counts per million mapped reads.

**Supplemental Table S7:** The hyperparameters used by each DeepArk model.

| Species                        | Initial learning rate | Dropout probability | Batch size | Weight decay       | Momentum |
|--------------------------------|-----------------------|---------------------|------------|--------------------|----------|
| <i>Caenorhabditis elegans</i>  | 0.1                   | 0.15                | 128        | $3 \times 10^{-6}$ | 0.9      |
| <i>Danio rerio</i>             | 0.1                   | 0.2                 | 128        | $1 \times 10^{-6}$ | 0.9      |
| <i>Drosophila melanogaster</i> | 0.1                   | 0.2                 | 128        | $3 \times 10^{-6}$ | 0.9      |
| <i>Mus musculus</i>            | 0.3                   | 0.15                | 128        | $1 \times 10^{-6}$ | 0.9      |

**Supplemental Table S9:** Thresholds used to filter datasets for each species.

| Species                        | Assay type | Target type                                            | Minimum peaks | Minimum mapped reads |
|--------------------------------|------------|--------------------------------------------------------|---------------|----------------------|
| <i>Caenorhabditis elegans</i>  | DNase-seq  | chromatin                                              | 500           | 5000000              |
| <i>Caenorhabditis elegans</i>  | ChIP-seq   | transcription factor                                   | 500           | 2000000              |
| <i>Caenorhabditis elegans</i>  | ChIP-seq   | histone mark – narrow                                  | 500           | 2000000              |
| <i>Caenorhabditis elegans</i>  | ChIP-seq   | histone mark – broad or enriched in repetitive regions | 500           | 5000000              |
| <i>Danio rerio</i>             | ATAC-seq   | chromatin                                              | 2500          | 25000000             |
| <i>Danio rerio</i>             | ChIP-seq   | transcription factor                                   | 2500          | 10000000             |
| <i>Danio rerio</i>             | ChIP-seq   | histone mark – narrow                                  | 2500          | 10000000             |
| <i>Danio rerio</i>             | ChIP-seq   | histone mark – broad or enriched in repetitive regions | 2500          | 25000000             |
| <i>Drosophila melanogaster</i> | DNase-seq  | chromatin                                              | 500           | 5000000              |
| <i>Drosophila melanogaster</i> | ChIP-seq   | transcription factor                                   | 500           | 2000000              |
| <i>Drosophila melanogaster</i> | ChIP-seq   | histone mark - narrow                                  | 500           | 2000000              |
| <i>Drosophila melanogaster</i> | ChIP-seq   | histone mark – broad or enriched in repetitive regions | 500           | 5000000              |
| <i>Mus musculus</i>            | DNase-seq  | chromatin                                              | 5000          | 50000000             |
| <i>Mus musculus</i>            | ChIP-seq   | transcription factor                                   | 5000          | 20000000             |
| <i>Mus musculus</i>            | ChIP-seq   | histone mark – narrow                                  | 5000          | 20000000             |
| <i>Mus musculus</i>            | ChIP-seq   | histone mark – broad or enriched in repetitive regions | 5000          | 50000000             |

**Supplemental Table S13:** Primer sequences used for *T48* enhancer mutants.

| Name           | Primer sequence                          |
|----------------|------------------------------------------|
| T48_CAGGAAG_fw | TCGCACGCAGAACTTCCTGCCTCTGGCCATCCC        |
| T48_CAGGAAG_rv | GGGATGGCCAGAGGCAGGAAGTTCTGCGTGCGA        |
| T48_CAGGTAC_fw | CGCACGCAGAACTACCTGCCTCTGGCCATCCC         |
| T48_CAGGTAC_rv | GGGATGGCCAGAGGCAGGTACTTCTGCGTGCG         |
| T48_CAGGCAG_fw | TCGCACGCAGAACTGCCTGCCTCTGGCCATCCC        |
| T48_CAGGCAG_rv | GGGATGGCCAGAGGCAGGCAGTTCTGCGTGCGA        |
| T48_CAGGTAG_fw | CGCACGCAGAACTACCTGCCTCTGGCCATCCCGCTTGAC  |
| T48_CAGGTAG_rv | GTGCAAGCGGGATGGCCAGAGGCAGGTAGTTCTGCGTGCG |
