# Supplementary material for: Modeling transcriptional regulation of model species with deep learning
Source: HighWire-hosted journal article supplement (doi:10.1101/gr.266171.120), 2021-04-22
Supplement: Supplemental_Table_S10.xlsx [file Supplemental_Table_S10.xlsx]

## Sheet: Sheet1
Supplemental Table S10: Results from conducting in silico saturated mutagenesis for SDC-3 binding (accession no. SRX2228883) at the first high-confidence DCC binding site (ce11:ChrX:6294496-6298590) on the C. elegans X Chromosome.
# Reference prediction:	0.992585
Chromosome	Position	Reference Allele	Alternative Allele	DeepArk Prediction (accession no. SRX2228883)
chrX	6294495	T	A	-1.1920928955078125e-07
chrX	6294495	T	C	-1.1920928955078125e-07
chrX	6294495	T	G	-1.1920928955078125e-07
chrX	6294496	G	A	-1.1920928955078125e-07
chrX	6294496	G	C	-1.1920928955078125e-07
chrX	6294496	G	T	-1.1920928955078125e-07
chrX	6294497	T	A	-1.1920928955078125e-07
chrX	6294497	T	C	-1.1920928955078125e-07
chrX	6294497	T	G	-1.1920928955078125e-07
chrX	6294498	A	C	-1.1920928955078125e-07
chrX	6294498	A	G	-1.1920928955078125e-07
chrX	6294498	A	T	-1.1920928955078125e-07
chrX	6294499	A	C	-5.960464477539063e-08
chrX	6294499	A	G	-1.1920928955078125e-07
chrX	6294499	A	T	-1.1920928955078125e-07
chrX	6294500	A	C	-5.960464477539063e-08
chrX	6294500	A	G	-1.1920928955078125e-07
chrX	6294500	A	T	-1.1920928955078125e-07
chrX	6294501	A	C	-1.1920928955078125e-07
chrX	6294501	A	G	-5.960464477539063e-08
chrX	6294501	A	T	-1.1920928955078125e-07
chrX	6294502	T	A	-1.1920928955078125e-07
chrX	6294502	T	C	-5.960464477539063e-08
chrX	6294502	T	G	-1.1920928955078125e-07
chrX	6294503	T	A	-1.1920928955078125e-07
chrX	6294503	T	C	-5.960464477539063e-08
chrX	6294503	T	G	-5.960464477539063e-08
chrX	6294504	T	A	-1.1920928955078125e-07
chrX	6294504	T	C	-5.960464477539063e-08
chrX	6294504	T	G	-5.960464477539063e-08
chrX	6294505	G	A	-1.1920928955078125e-07
chrX	6294505	G	C	-5.960464477539063e-08
chrX	6294505	G	T	-1.1920928955078125e-07
chrX	6294506	T	A	-1.1920928955078125e-07
chrX	6294506	T	C	-5.960464477539063e-08
chrX	6294506	T	G	-1.1920928955078125e-07
chrX	6294507	G	A	-1.1920928955078125e-07
chrX	6294507	G	C	-1.1920928955078125e-07
chrX	6294507	G	T	-1.1920928955078125e-07
chrX	6294508	G	A	-1.1920928955078125e-07
chrX	6294508	G	C	-5.960464477539063e-08
chrX	6294508	G	T	-1.1920928955078125e-07
chrX	6294509	G	A	-1.1920928955078125e-07
chrX	6294509	G	C	-1.1920928955078125e-07
chrX	6294509	G	T	-1.7881393432617188e-07
chrX	6294510	A	C	0.0
chrX	6294510	A	G	-5.960464477539063e-08
chrX	6294510	A	T	0.0
chrX	6294511	C	A	-5.960464477539063e-08
chrX	6294511	C	G	-5.960464477539063e-08
chrX	6294511	C	T	-5.960464477539063e-08
chrX	6294512	A	C	-1.1920928955078125e-07
chrX	6294512	A	G	-5.960464477539063e-08
chrX	6294512	A	T	-5.960464477539063e-08
chrX	6294513	A	C	-5.960464477539063e-08
chrX	6294513	A	G	-1.1920928955078125e-07
chrX	6294513	A	T	-1.1920928955078125e-07
chrX	6294514	A	C	-5.960464477539063e-08
chrX	6294514	A	G	-1.1920928955078125e-07
chrX	6294514	A	T	-5.960464477539063e-08
chrX	6294515	T	A	-1.1920928955078125e-07
chrX	6294515	T	C	-1.7881393432617188e-07
chrX	6294515	T	G	-1.1920928955078125e-07
chrX	6294516	T	A	-5.960464477539063e-08
chrX	6294516	T	C	-5.960464477539063e-08
chrX	6294516	T	G	0.0
chrX	6294517	A	C	0.0
chrX	6294517	A	G	-5.960464477539063e-08
chrX	6294517	A	T	-5.960464477539063e-08
chrX	6294518	A	C	-5.960464477539063e-08
chrX	6294518	A	G	-5.960464477539063e-08
chrX	6294518	A	T	-5.960464477539063e-08
chrX	6294519	A	C	5.960464477539063e-08
chrX	6294519	A	G	-5.960464477539063e-08
chrX	6294519	A	T	0.0
chrX	6294520	A	C	1.1920928955078125e-07
chrX	6294520	A	G	0.0
chrX	6294520	A	T	5.960464477539063e-08
chrX	6294521	A	C	5.960464477539063e-08
chrX	6294521	A	G	1.1920928955078125e-07
chrX	6294521	A	T	0.0
chrX	6294522	A	C	-5.960464477539063e-08
chrX	6294522	A	G	-5.960464477539063e-08
chrX	6294522	A	T	-5.960464477539063e-08
chrX	6294523	T	A	-1.1920928955078125e-07
chrX	6294523	T	C	-1.1920928955078125e-07
chrX	6294523	T	G	-1.7881393432617188e-07
chrX	6294524	T	A	-1.1920928955078125e-07
chrX	6294524	T	C	-1.7881393432617188e-07
chrX	6294524	T	G	-2.384185791015625e-07
chrX	6294525	T	A	-1.1920928955078125e-07
chrX	6294525	T	C	-1.1920928955078125e-07
chrX	6294525	T	G	-1.1920928955078125e-07
chrX	6294526	T	A	-1.7881393432617188e-07
chrX	6294526	T	C	-2.384185791015625e-07
chrX	6294526	T	G	-2.980232238769531e-07
chrX	6294527	T	A	-5.960464477539063e-08
chrX	6294527	T	C	-5.960464477539063e-08
chrX	6294527	T	G	-5.960464477539063e-08
chrX	6294528	A	C	5.960464477539063e-08
chrX	6294528	A	G	-1.7881393432617188e-07
chrX	6294528	A	T	0.0
chrX	6294529	G	A	1.1920928955078125e-07
chrX	6294529	G	C	1.1920928955078125e-07
chrX	6294529	G	T	5.960464477539063e-08
chrX	6294530	G	A	-5.960464477539063e-08
chrX	6294530	G	C	0.0
chrX	6294530	G	T	-5.960464477539063e-08
chrX	6294531	C	A	-1.7881393432617188e-07
chrX	6294531	C	G	-5.960464477539063e-08
chrX	6294531	C	T	-1.7881393432617188e-07
chrX	6294532	A	C	-1.1920928955078125e-07
chrX	6294532	A	G	1.7881393432617188e-07
chrX	6294532	A	T	-1.1920928955078125e-07
chrX	6294533	A	C	5.960464477539063e-08
chrX	6294533	A	G	3.5762786865234375e-07
chrX	6294533	A	T	5.960464477539063e-08
chrX	6294534	A	C	1.1920928955078125e-07
chrX	6294534	A	G	1.7881393432617188e-07
chrX	6294534	A	T	-5.960464477539063e-08
chrX	6294535	A	C	-5.960464477539063e-08
chrX	6294535	A	G	1.7881393432617188e-07
chrX	6294535	A	T	-5.960464477539063e-08
chrX	6294536	C	A	-1.1920928955078125e-07
chrX	6294536	C	G	-1.1920928955078125e-07
chrX	6294536	C	T	-2.384185791015625e-07
chrX	6294537	T	A	-1.7881393432617188e-07
chrX	6294537	T	C	0.0
chrX	6294537	T	G	1.1920928955078125e-07
chrX	6294538	T	A	-1.1920928955078125e-07
chrX	6294538	T	C	1.1920928955078125e-07
chrX	6294538	T	G	1.7881393432617188e-07
chrX	6294539	C	A	-5.960464477539063e-08
chrX	6294539	C	G	0.0
chrX	6294539	C	T	-2.384185791015625e-07
chrX	6294540	T	A	2.980232238769531e-07
chrX	6294540	T	C	4.172325134277344e-07
chrX	6294540	T	G	5.960464477539063e-08
chrX	6294541	G	A	-4.172325134277344e-07
chrX	6294541	G	C	-2.384185791015625e-07
chrX	6294541	G	T	5.960464477539063e-08
chrX	6294542	C	A	0.0
chrX	6294542	C	G	5.960464477539063e-08
chrX	6294542	C	T	-1.1920928955078125e-07
chrX	6294543	C	A	-2.384185791015625e-07
chrX	6294543	C	G	-2.384185791015625e-07
chrX	6294543	C	T	-4.76837158203125e-07
chrX	6294544	G	A	-2.384185791015625e-07
chrX	6294544	G	C	-4.172325134277344e-07
chrX	6294544	G	T	-4.172325134277344e-07
chrX	6294545	A	C	-1.7881393432617188e-07
chrX	6294545	A	G	-6.556510925292969e-07
chrX	6294545	A	T	-2.384185791015625e-07
chrX	6294546	C	A	-3.5762786865234375e-07
chrX	6294546	C	G	1.1920928955078125e-07
chrX	6294546	C	T	-2.384185791015625e-07
chrX	6294547	A	C	-4.76837158203125e-07
chrX	6294547	A	G	4.76837158203125e-07
chrX	6294547	A	T	1.7881393432617188e-07
chrX	6294548	C	A	4.172325134277344e-07
chrX	6294548	C	G	-2.980232238769531e-07
chrX	6294548	C	T	2.384185791015625e-07
chrX	6294549	T	A	5.364418029785156e-07
chrX	6294549	T	C	5.960464477539063e-08
chrX	6294549	T	G	4.76837158203125e-07
chrX	6294550	A	C	5.960464477539063e-08
chrX	6294550	A	G	5.960464477539062e-07
chrX	6294550	A	T	-1.1920928955078125e-07
chrX	6294551	C	A	-3.5762786865234375e-07
chrX	6294551	C	G	2.384185791015625e-07
chrX	6294551	C	T	-2.384185791015625e-07
chrX	6294552	A	C	1.1920928955078125e-07
chrX	6294552	A	G	-1.1920928955078125e-07
chrX	6294552	A	T	-2.384185791015625e-07
chrX	6294553	G	A	-1.1920928955078125e-07
chrX	6294553	G	C	1.7881393432617188e-07
chrX	6294553	G	T	-2.980232238769531e-07
chrX	6294554	A	C	-4.172325134277344e-07
chrX	6294554	A	G	-1.2516975402832031e-06
chrX	6294554	A	T	-4.76837158203125e-07
chrX	6294555	T	A	-7.152557373046875e-07
chrX	6294555	T	C	-8.940696716308594e-07
chrX	6294555	T	G	-2.980232238769531e-07
chrX	6294556	C	A	-2.980232238769531e-07
chrX	6294556	C	G	4.172325134277344e-07
chrX	6294556	C	T	4.76837158203125e-07
chrX	6294557	C	A	-8.344650268554688e-07
chrX	6294557	C	G	1.1920928955078125e-07
chrX	6294557	C	T	-8.940696716308594e-07
chrX	6294558	G	A	-1.2516975402832031e-06
chrX	6294558	G	C	-1.4901161193847656e-06
chrX	6294558	G	T	-1.8477439880371094e-06
chrX	6294559	A	C	2.384185791015625e-07
chrX	6294559	A	G	7.152557373046875e-07
chrX	6294559	A	T	-5.960464477539063e-08
chrX	6294560	A	C	1.1920928955078125e-07
chrX	6294560	A	G	-2.384185791015625e-07
chrX	6294560	A	T	-2.980232238769531e-07
chrX	6294561	G	A	-1.1920928955078125e-07
chrX	6294561	G	C	-5.960464477539063e-08
chrX	6294561	G	T	-4.172325134277344e-07
chrX	6294562	A	C	-5.364418029785156e-07
chrX	6294562	A	G	3.5762786865234375e-07
chrX	6294562	A	T	-1.1920928955078125e-07
chrX	6294563	C	A	2.980232238769531e-07
chrX	6294563	C	G	2.980232238769531e-07
chrX	6294563	C	T	2.384185791015625e-07
chrX	6294564	T	A	7.748603820800781e-07
chrX	6294564	T	C	1.7881393432617188e-07
chrX	6294564	T	G	1.9669532775878906e-06
chrX	6294565	A	C	4.172325134277344e-07
chrX	6294565	A	G	4.172325134277344e-07
chrX	6294565	A	T	2.384185791015625e-07
chrX	6294566	C	A	-8.344650268554688e-07
chrX	6294566	C	G	-5.960464477539062e-07
chrX	6294566	C	T	-1.0132789611816406e-06
chrX	6294567	T	A	4.76837158203125e-07
chrX	6294567	T	C	-4.76837158203125e-07
chrX	6294567	T	G	7.748603820800781e-07
chrX	6294568	T	A	-4.76837158203125e-07
chrX	6294568	T	C	-1.7881393432617188e-07
chrX	6294568	T	G	2.384185791015625e-07
chrX	6294569	T	A	-6.556510925292969e-07
chrX	6294569	T	C	5.364418029785156e-07
chrX	6294569	T	G	4.76837158203125e-07
chrX	6294570	T	A	-2.384185791015625e-07
chrX	6294570	T	C	-5.960464477539062e-07
chrX	6294570	T	G	-4.172325134277344e-07
chrX	6294571	T	A	-7.152557373046875e-07
chrX	6294571	T	C	6.556510925292969e-07
chrX	6294571	T	G	2.384185791015625e-07
chrX	6294572	G	A	2.980232238769531e-07
chrX	6294572	G	C	-1.1920928955078125e-07
chrX	6294572	G	T	-1.2516975402832031e-06
chrX	6294573	T	A	6.556510925292969e-07
chrX	6294573	T	C	-7.152557373046875e-07
chrX	6294573	T	G	2.980232238769531e-07
chrX	6294574	C	A	-8.344650268554688e-07
chrX	6294574	C	G	-4.172325134277344e-07
chrX	6294574	C	T	-5.364418029785156e-07
chrX	6294575	C	A	1.1920928955078125e-07
chrX	6294575	C	G	5.364418029785156e-07
chrX	6294575	C	T	-1.9669532775878906e-06
chrX	6294576	A	C	-2.086162567138672e-06
chrX	6294576	A	G	2.384185791015625e-07
chrX	6294576	A	T	-1.6093254089355469e-06
chrX	6294577	T	A	9.5367431640625e-07
chrX	6294577	T	C	-1.4901161193847656e-06
chrX	6294577	T	G	-2.384185791015625e-07
chrX	6294578	T	A	-6.556510925292969e-07
chrX	6294578	T	C	-1.0132789611816406e-06
chrX	6294578	T	G	-1.9669532775878906e-06
chrX	6294579	C	A	-1.8477439880371094e-06
chrX	6294579	C	G	-1.6093254089355469e-06
chrX	6294579	C	T	-1.7285346984863281e-06
chrX	6294580	G	A	-1.7285346984863281e-06
chrX	6294580	G	C	-3.933906555175781e-06
chrX	6294580	G	T	-1.6093254089355469e-06
chrX	6294581	T	A	-1.1324882507324219e-06
chrX	6294581	T	C	-2.6226043701171875e-06
chrX	6294581	T	G	-4.708766937255859e-06
chrX	6294582	G	A	-1.9669532775878906e-06
chrX	6294582	G	C	3.5762786865234375e-07
chrX	6294582	G	T	-1.1324882507324219e-06
chrX	6294583	G	A	-2.7418136596679688e-06
chrX	6294583	G	C	-3.3974647521972656e-06
chrX	6294583	G	T	-3.874301910400391e-06
chrX	6294584	A	C	-2.205371856689453e-06
chrX	6294584	A	G	-1.4901161193847656e-06
chrX	6294584	A	T	-2.682209014892578e-06
chrX	6294585	A	C	-1.3709068298339844e-06
chrX	6294585	A	G	-7.152557373046875e-07
chrX	6294585	A	T	-1.6093254089355469e-06
chrX	6294586	T	A	9.5367431640625e-07
chrX	6294586	T	C	5.960464477539063e-08
chrX	6294586	T	G	1.2516975402832031e-06
chrX	6294587	T	A	1.1920928955078125e-06
chrX	6294587	T	C	1.1920928955078125e-06
chrX	6294587	T	G	1.6093254089355469e-06
chrX	6294588	T	A	1.3709068298339844e-06
chrX	6294588	T	C	5.364418029785156e-07
chrX	6294588	T	G	1.4901161193847656e-06
chrX	6294589	T	A	-6.556510925292969e-07
chrX	6294589	T	C	3.516674041748047e-06
chrX	6294589	T	G	1.3709068298339844e-06
chrX	6294590	G	A	-1.9073486328125e-06
chrX	6294590	G	C	-1.7285346984863281e-06
chrX	6294590	G	T	-3.993511199951172e-06
chrX	6294591	A	C	-8.940696716308594e-07
chrX	6294591	A	G	-1.7285346984863281e-06
chrX	6294591	A	T	-1.9669532775878906e-06
chrX	6294592	T	A	0.0
chrX	6294592	T	C	9.5367431640625e-07
chrX	6294592	T	G	2.384185791015625e-07
chrX	6294593	G	A	-2.2649765014648438e-06
chrX	6294593	G	C	-1.9669532775878906e-06
chrX	6294593	G	T	-2.9206275939941406e-06
chrX	6294594	A	C	-1.3709068298339844e-06
chrX	6294594	A	G	1.7881393432617188e-07
chrX	6294594	A	T	-2.562999725341797e-06
chrX	6294595	T	A	-2.8014183044433594e-06
chrX	6294595	T	C	-3.516674041748047e-06
chrX	6294595	T	G	-3.5762786865234375e-07
chrX	6294596	C	A	-2.86102294921875e-06
chrX	6294596	C	G	2.562999725341797e-06
chrX	6294596	C	T	0.0
chrX	6294597	C	A	-1.1324882507324219e-06
chrX	6294597	C	G	3.933906555175781e-06
chrX	6294597	C	T	-4.112720489501953e-06
chrX	6294598	A	C	-3.516674041748047e-06
chrX	6294598	A	G	3.635883331298828e-06
chrX	6294598	A	T	0.0
chrX	6294599	T	A	-1.0132789611816406e-06
chrX	6294599	T	C	8.940696716308594e-07
chrX	6294599	T	G	6.258487701416016e-06
chrX	6294600	A	C	2.384185791015625e-07
chrX	6294600	A	G	2.086162567138672e-06
chrX	6294600	A	T	1.1324882507324219e-06
chrX	6294601	T	A	-7.748603820800781e-07
chrX	6294601	T	C	5.364418029785156e-07
chrX	6294601	T	G	2.562999725341797e-06
chrX	6294602	A	C	4.172325134277344e-06
chrX	6294602	A	G	5.0067901611328125e-06
chrX	6294602	A	T	1.430511474609375e-06
chrX	6294603	A	C	2.980232238769531e-07
chrX	6294603	A	G	1.3709068298339844e-06
chrX	6294603	A	T	0.0
chrX	6294604	T	A	5.960464477539063e-08
chrX	6294604	T	C	4.887580871582031e-06
chrX	6294604	T	G	2.4437904357910156e-06
chrX	6294605	G	A	-2.8014183044433594e-06
chrX	6294605	G	C	1.0728836059570312e-06
chrX	6294605	G	T	-3.2186508178710938e-06
chrX	6294606	A	C	2.8014183044433594e-06
chrX	6294606	A	G	-5.960464477539063e-08
chrX	6294606	A	T	-2.980232238769531e-07
chrX	6294607	G	A	-8.940696716308594e-07
chrX	6294607	G	C	4.172325134277344e-07
chrX	6294607	G	T	1.0132789611816406e-06
chrX	6294608	A	C	-1.0132789611816406e-06
chrX	6294608	A	G	2.682209014892578e-06
chrX	6294608	A	T	-4.172325134277344e-07
chrX	6294609	C	A	-8.940696716308594e-07
chrX	6294609	C	G	9.5367431640625e-07
chrX	6294609	C	T	1.7881393432617188e-07
chrX	6294610	T	A	1.430511474609375e-06
chrX	6294610	T	C	-1.1324882507324219e-06
chrX	6294610	T	G	5.662441253662109e-06
chrX	6294611	G	A	-2.9802322387695312e-06
chrX	6294611	G	C	-8.940696716308594e-07
chrX	6294611	G	T	-2.086162567138672e-06
chrX	6294612	A	C	-1.8477439880371094e-06
chrX	6294612	A	G	1.8477439880371094e-06
chrX	6294612	A	T	1.4901161193847656e-06
chrX	6294613	C	A	4.0531158447265625e-06
chrX	6294613	C	G	3.3974647521972656e-06
chrX	6294613	C	T	4.351139068603516e-06
chrX	6294614	C	A	3.2782554626464844e-06
chrX	6294614	C	G	7.331371307373047e-06
chrX	6294614	C	T	-4.351139068603516e-06
chrX	6294615	A	C	-2.9802322387695312e-06
chrX	6294615	A	G	5.364418029785156e-07
chrX	6294615	A	T	-1.5497207641601562e-06
chrX	6294616	C	A	-1.0132789611816406e-06
chrX	6294616	C	G	-3.4570693969726562e-06
chrX	6294616	C	T	5.960464477539063e-08
chrX	6294617	G	A	-1.4901161193847656e-06
chrX	6294617	G	C	2.980232238769531e-07
chrX	6294617	G	T	-4.76837158203125e-06
chrX	6294618	G	A	3.159046173095703e-06
chrX	6294618	G	C	-8.940696716308594e-07
chrX	6294618	G	T	-1.7881393432617188e-07
chrX	6294619	T	A	2.9206275939941406e-06
chrX	6294619	T	C	-7.748603820800781e-07
chrX	6294619	T	G	-3.6954879760742188e-06
chrX	6294620	T	A	-1.6093254089355469e-06
chrX	6294620	T	C	8.344650268554688e-07
chrX	6294620	T	G	5.960464477539062e-07
chrX	6294621	G	A	-1.3709068298339844e-06
chrX	6294621	G	C	-1.6093254089355469e-06
chrX	6294621	G	T	-8.940696716308594e-07
chrX	6294622	C	A	1.7881393432617188e-07
chrX	6294622	C	G	1.3709068298339844e-06
chrX	6294622	C	T	-1.2516975402832031e-06
chrX	6294623	C	A	-1.7285346984863281e-06
chrX	6294623	C	G	-1.1324882507324219e-06
chrX	6294623	C	T	-3.2186508178710938e-06
chrX	6294624	T	A	3.5762786865234375e-07
chrX	6294624	T	C	-1.6093254089355469e-06
chrX	6294624	T	G	2.0265579223632812e-06
chrX	6294625	T	A	-2.562999725341797e-06
chrX	6294625	T	C	-8.940696716308594e-07
chrX	6294625	T	G	-3.2186508178710938e-06
chrX	6294626	C	A	-6.854534149169922e-06
chrX	6294626	C	G	-1.3709068298339844e-06
chrX	6294626	C	T	-6.735324859619141e-06
chrX	6294627	A	C	-7.748603820800781e-07
chrX	6294627	A	G	1.9669532775878906e-06
chrX	6294627	A	T	-4.827976226806641e-06
chrX	6294628	A	C	-4.947185516357422e-06
chrX	6294628	A	G	-1.6093254089355469e-06
chrX	6294628	A	T	-1.2516975402832031e-06
chrX	6294629	T	A	-4.351139068603516e-06
chrX	6294629	T	C	-2.5033950805664062e-06
chrX	6294629	T	G	1.8477439880371094e-06
chrX	6294630	C	A	-6.020069122314453e-06
chrX	6294630	C	G	-2.9802322387695312e-06
chrX	6294630	C	T	-7.033348083496094e-06
chrX	6294631	T	A	-1.6093254089355469e-06
chrX	6294631	T	C	-2.86102294921875e-06
chrX	6294631	T	G	-6.377696990966797e-06
chrX	6294632	G	A	-9.119510650634766e-06
chrX	6294632	G	C	-4.0531158447265625e-06
chrX	6294632	G	T	-6.079673767089844e-06
chrX	6294633	G	A	-3.635883331298828e-06
chrX	6294633	G	C	-6.496906280517578e-06
chrX	6294633	G	T	-8.285045623779297e-06
chrX	6294634	A	C	-5.424022674560547e-06
chrX	6294634	A	G	-3.7550926208496094e-06
chrX	6294634	A	T	-6.67572021484375e-06
chrX	6294635	A	C	-4.947185516357422e-06
chrX	6294635	A	G	-5.960464477539063e-08
chrX	6294635	A	T	-1.7881393432617188e-06
chrX	6294636	A	C	3.635883331298828e-06
chrX	6294636	A	G	6.616115570068359e-06
chrX	6294636	A	T	-2.682209014892578e-06
chrX	6294637	A	C	-1.1324882507324219e-06
chrX	6294637	A	G	-1.6093254089355469e-06
chrX	6294637	A	T	-4.172325134277344e-06
chrX	6294638	A	C	-1.6689300537109375e-06
chrX	6294638	A	G	4.172325134277344e-07
chrX	6294638	A	T	-5.185604095458984e-06
chrX	6294639	G	A	-2.9802322387695312e-06
chrX	6294639	G	C	-4.0531158447265625e-06
chrX	6294639	G	T	-3.814697265625e-06
chrX	6294640	C	A	-3.039836883544922e-06
chrX	6294640	C	G	-3.159046173095703e-06
chrX	6294640	C	T	-2.8014183044433594e-06
chrX	6294641	G	A	-3.4570693969726562e-06
chrX	6294641	G	C	-3.039836883544922e-06
chrX	6294641	G	T	-4.827976226806641e-06
chrX	6294642	A	C	-2.2649765014648438e-06
chrX	6294642	A	G	-6.556510925292969e-07
chrX	6294642	A	T	-4.351139068603516e-06
chrX	6294643	A	C	-3.5762786865234375e-06
chrX	6294643	A	G	4.172325134277344e-07
chrX	6294643	A	T	1.7285346984863281e-06
chrX	6294644	T	A	-2.980232238769531e-07
chrX	6294644	T	C	-3.5762786865234375e-07
chrX	6294644	T	G	2.9206275939941406e-06
chrX	6294645	A	C	1.8477439880371094e-06
chrX	6294645	A	G	1.7285346984863281e-06
chrX	6294645	A	T	-4.76837158203125e-07
chrX	6294646	G	A	-4.708766937255859e-06
chrX	6294646	G	C	-1.1324882507324219e-06
chrX	6294646	G	T	-1.1324882507324219e-06
chrX	6294647	C	A	-4.589557647705078e-06
chrX	6294647	C	G	-2.086162567138672e-06
chrX	6294647	C	T	-2.682209014892578e-06
chrX	6294648	A	C	-1.2516975402832031e-06
chrX	6294648	A	G	-2.086162567138672e-06
chrX	6294648	A	T	-1.0132789611816406e-06
chrX	6294649	A	C	-1.9669532775878906e-06
chrX	6294649	A	G	1.5497207641601562e-06
chrX	6294649	A	T	-2.980232238769531e-07
chrX	6294650	C	A	-5.781650543212891e-06
chrX	6294650	C	G	-1.6093254089355469e-06
chrX	6294650	C	T	-3.874301910400391e-06
chrX	6294651	A	C	-1.4901161193847656e-06
chrX	6294651	A	G	-6.556510925292969e-07
chrX	6294651	A	T	5.364418029785156e-07
chrX	6294652	A	C	4.112720489501953e-06
chrX	6294652	A	G	3.3974647521972656e-06
chrX	6294652	A	T	1.7881393432617188e-06
chrX	6294653	A	C	2.384185791015625e-07
chrX	6294653	A	G	3.7550926208496094e-06
chrX	6294653	A	T	-1.4901161193847656e-06
chrX	6294654	T	A	1.5497207641601562e-06
chrX	6294654	T	C	1.6093254089355469e-06
chrX	6294654	T	G	3.7550926208496094e-06
chrX	6294655	T	A	-8.940696716308594e-07
chrX	6294655	T	C	-3.159046173095703e-06
chrX	6294655	T	G	3.516674041748047e-06
chrX	6294656	C	A	5.364418029785156e-07
chrX	6294656	C	G	1.2516975402832031e-06
chrX	6294656	C	T	8.940696716308594e-07
chrX	6294657	C	A	-2.86102294921875e-06
chrX	6294657	C	G	2.8014183044433594e-06
chrX	6294657	C	T	-3.516674041748047e-06
chrX	6294658	G	A	-3.3974647521972656e-06
chrX	6294658	G	C	-2.4437904357910156e-06
chrX	6294658	G	T	-2.9206275939941406e-06
chrX	6294659	A	C	-1.7285346984863281e-06
chrX	6294659	A	G	-1.9669532775878906e-06
chrX	6294659	A	T	-1.8477439880371094e-06
chrX	6294660	T	A	8.940696716308594e-07
chrX	6294660	T	C	1.9669532775878906e-06
chrX	6294660	T	G	6.556510925292969e-07
chrX	6294661	T	A	6.556510925292969e-07
chrX	6294661	T	C	4.0531158447265625e-06
chrX	6294661	T	G	3.3974647521972656e-06
chrX	6294662	T	A	-3.159046173095703e-06
chrX	6294662	T	C	-2.3245811462402344e-06
chrX	6294662	T	G	-5.960464477539063e-08
chrX	6294663	G	A	1.2516975402832031e-06
chrX	6294663	G	C	-1.6093254089355469e-06
chrX	6294663	G	T	-4.708766937255859e-06
chrX	6294664	T	A	3.159046173095703e-06
chrX	6294664	T	C	3.159046173095703e-06
chrX	6294664	T	G	2.205371856689453e-06
chrX	6294665	T	A	-7.748603820800781e-07
chrX	6294665	T	C	-1.3709068298339844e-06
chrX	6294665	T	G	-1.7285346984863281e-06
chrX	6294666	C	A	-2.6226043701171875e-06
chrX	6294666	C	G	-1.1324882507324219e-06
chrX	6294666	C	T	-4.708766937255859e-06
chrX	6294667	A	C	3.039836883544922e-06
chrX	6294667	A	G	1.7881393432617188e-06
chrX	6294667	A	T	2.384185791015625e-06
chrX	6294668	G	A	2.384185791015625e-07
chrX	6294668	G	C	3.159046173095703e-06
chrX	6294668	G	T	3.5762786865234375e-07
chrX	6294669	T	A	4.947185516357422e-06
chrX	6294669	T	C	1.7285346984863281e-06
chrX	6294669	T	G	7.748603820800781e-07
chrX	6294670	T	A	1.9073486328125e-06
chrX	6294670	T	C	3.516674041748047e-06
chrX	6294670	T	G	5.960464477539062e-07
chrX	6294671	T	A	1.7881393432617188e-07
chrX	6294671	T	C	2.1457672119140625e-06
chrX	6294671	T	G	-5.960464477539063e-08
chrX	6294672	T	A	-1.3709068298339844e-06
chrX	6294672	T	C	-1.7881393432617188e-07
chrX	6294672	T	G	-2.384185791015625e-07
chrX	6294673	C	A	-2.086162567138672e-06
chrX	6294673	C	G	-2.3245811462402344e-06
chrX	6294673	C	T	-3.874301910400391e-06
chrX	6294674	C	A	-6.556510925292969e-07
chrX	6294674	C	G	3.039836883544922e-06
chrX	6294674	C	T	-5.781650543212891e-06
chrX	6294675	A	C	-3.2186508178710938e-06
chrX	6294675	A	G	5.960464477539062e-07
chrX	6294675	A	T	-3.159046173095703e-06
chrX	6294676	G	A	-2.6226043701171875e-06
chrX	6294676	G	C	-8.940696716308594e-07
chrX	6294676	G	T	-2.3245811462402344e-06
chrX	6294677	T	A	3.7550926208496094e-06
chrX	6294677	T	C	3.3974647521972656e-06
chrX	6294677	T	G	-2.9802322387695312e-06
chrX	6294678	T	A	-1.3709068298339844e-06
chrX	6294678	T	C	3.039836883544922e-06
chrX	6294678	T	G	3.874301910400391e-06
chrX	6294679	A	C	-4.172325134277344e-07
chrX	6294679	A	G	1.9669532775878906e-06
chrX	6294679	A	T	6.556510925292969e-07
chrX	6294680	T	A	-6.556510925292969e-07
chrX	6294680	T	C	6.735324859619141e-06
chrX	6294680	T	G	9.5367431640625e-07
chrX	6294681	G	A	-5.364418029785156e-07
chrX	6294681	G	C	7.748603820800781e-07
chrX	6294681	G	T	-1.3709068298339844e-06
chrX	6294682	T	A	5.185604095458984e-06
chrX	6294682	T	C	2.562999725341797e-06
chrX	6294682	T	G	8.940696716308594e-06
chrX	6294683	T	A	-1.6093254089355469e-06
chrX	6294683	T	C	5.841255187988281e-06
chrX	6294683	T	G	9.655952453613281e-06
chrX	6294684	G	A	-3.635883331298828e-06
chrX	6294684	G	C	2.9206275939941406e-06
chrX	6294684	G	T	-3.635883331298828e-06
chrX	6294685	A	C	2.3245811462402344e-06
chrX	6294685	A	G	1.6093254089355469e-06
chrX	6294685	A	T	-2.4437904357910156e-06
chrX	6294686	G	A	5.364418029785156e-07
chrX	6294686	G	C	4.589557647705078e-06
chrX	6294686	G	T	2.205371856689453e-06
chrX	6294687	T	A	4.887580871582031e-06
chrX	6294687	T	C	9.238719940185547e-06
chrX	6294687	T	G	8.58306884765625e-06
chrX	6294688	A	C	3.159046173095703e-06
chrX	6294688	A	G	-1.1324882507324219e-06
chrX	6294688	A	T	1.0132789611816406e-06
chrX	6294689	C	A	-1.2516975402832031e-06
chrX	6294689	C	G	-2.384185791015625e-07
chrX	6294689	C	T	-1.2516975402832031e-06
chrX	6294690	A	C	1.1324882507324219e-06
chrX	6294690	A	G	1.0728836059570312e-06
chrX	6294690	A	T	-1.3709068298339844e-06
chrX	6294691	T	A	1.8477439880371094e-06
chrX	6294691	T	C	-3.4570693969726562e-06
chrX	6294691	T	G	-4.291534423828125e-06
chrX	6294692	T	A	-2.3245811462402344e-06
chrX	6294692	T	C	6.616115570068359e-06
chrX	6294692	T	G	-2.9206275939941406e-06
chrX	6294693	T	A	-1.1324882507324219e-06
chrX	6294693	T	C	1.3113021850585938e-06
chrX	6294693	T	G	1.9669532775878906e-06
chrX	6294694	A	C	5.125999450683594e-06
chrX	6294694	A	G	8.940696716308594e-07
chrX	6294694	A	T	3.5762786865234375e-07
chrX	6294695	C	A	-4.947185516357422e-06
chrX	6294695	C	G	-2.205371856689453e-06
chrX	6294695	C	T	-6.020069122314453e-06
chrX	6294696	T	A	7.808208465576172e-06
chrX	6294696	T	C	7.152557373046875e-07
chrX	6294696	T	G	6.854534149169922e-06
chrX	6294697	T	A	-1.7285346984863281e-06
chrX	6294697	T	C	2.4437904357910156e-06
chrX	6294697	T	G	3.3974647521972656e-06
chrX	6294698	C	A	-2.4437904357910156e-06
chrX	6294698	C	G	-7.748603820800781e-07
chrX	6294698	C	T	-7.748603820800781e-07
chrX	6294699	C	A	1.6093254089355469e-06
chrX	6294699	C	G	-1.3709068298339844e-06
chrX	6294699	C	T	-2.3245811462402344e-06
chrX	6294700	C	A	1.6689300537109375e-06
chrX	6294700	C	G	2.384185791015625e-07
chrX	6294700	C	T	-7.748603820800781e-07
chrX	6294701	A	C	-5.066394805908203e-06
chrX	6294701	A	G	-5.781650543212891e-06
chrX	6294701	A	T	7.152557373046875e-07
chrX	6294702	C	A	2.3245811462402344e-06
chrX	6294702	C	G	3.635883331298828e-06
chrX	6294702	C	T	8.404254913330078e-06
chrX	6294703	C	A	-6.735324859619141e-06
chrX	6294703	C	G	-3.933906555175781e-06
chrX	6294703	C	T	-3.635883331298828e-06
chrX	6294704	G	A	0.0
chrX	6294704	G	C	-1.6689300537109375e-06
chrX	6294704	G	T	-6.258487701416016e-06
chrX	6294705	T	A	6.198883056640625e-06
chrX	6294705	T	C	-3.159046173095703e-06
chrX	6294705	T	G	1.6689300537109375e-06
chrX	6294706	T	A	-2.8014183044433594e-06
chrX	6294706	T	C	2.3245811462402344e-06
chrX	6294706	T	G	5.900859832763672e-06
chrX	6294707	C	A	-1.6093254089355469e-06
chrX	6294707	C	G	4.172325134277344e-06
chrX	6294707	C	T	-1.0371208190917969e-05
chrX	6294708	A	C	1.8477439880371094e-06
chrX	6294708	A	G	5.662441253662109e-06
chrX	6294708	A	T	2.1457672119140625e-06
chrX	6294709	T	A	-2.562999725341797e-06
chrX	6294709	T	C	3.993511199951172e-06
chrX	6294709	T	G	-8.940696716308594e-07
chrX	6294710	C	A	-3.874301910400391e-06
chrX	6294710	C	G	-3.6954879760742188e-06
chrX	6294710	C	T	-2.3245811462402344e-06
chrX	6294711	A	C	7.927417755126953e-06
chrX	6294711	A	G	7.3909759521484375e-06
chrX	6294711	A	T	2.4437904357910156e-06
chrX	6294712	T	A	-6.556510925292969e-07
chrX	6294712	T	C	5.543231964111328e-06
chrX	6294712	T	G	1.4901161193847656e-06
chrX	6294713	T	A	4.649162292480469e-06
chrX	6294713	T	C	1.138448715209961e-05
chrX	6294713	T	G	2.682209014892578e-06
chrX	6294714	T	A	7.808208465576172e-06
chrX	6294714	T	C	8.761882781982422e-06
chrX	6294714	T	G	3.7550926208496094e-06
chrX	6294715	T	A	5.543231964111328e-06
chrX	6294715	T	C	1.0192394256591797e-05
chrX	6294715	T	G	5.066394805908203e-06
chrX	6294716	C	A	-3.5762786865234375e-07
chrX	6294716	C	G	1.2516975402832031e-06
chrX	6294716	C	T	1.9669532775878906e-06
chrX	6294717	G	A	2.8014183044433594e-06
chrX	6294717	G	C	4.708766937255859e-06
chrX	6294717	G	T	5.125999450683594e-06
chrX	6294718	G	A	6.020069122314453e-06
chrX	6294718	G	C	-1.3887882232666016e-05
chrX	6294718	G	T	2.086162567138672e-06
chrX	6294719	G	A	6.020069122314453e-06
chrX	6294719	G	C	5.4836273193359375e-06
chrX	6294719	G	T	4.827976226806641e-06
chrX	6294720	C	A	5.364418029785156e-06
chrX	6294720	C	G	3.5762786865234375e-07
chrX	6294720	C	T	3.7550926208496094e-06
chrX	6294721	C	A	3.635883331298828e-06
chrX	6294721	C	G	7.748603820800781e-07
chrX	6294721	C	T	9.953975677490234e-06
chrX	6294722	C	A	5.4836273193359375e-06
chrX	6294722	C	G	2.8014183044433594e-06
chrX	6294722	C	T	1.8477439880371094e-06
chrX	6294723	T	A	3.5762786865234375e-06
chrX	6294723	T	C	3.993511199951172e-06
chrX	6294723	T	G	7.62939453125e-06
chrX	6294724	A	C	3.993511199951172e-06
chrX	6294724	A	G	6.258487701416016e-06
chrX	6294724	A	T	6.377696990966797e-06
chrX	6294725	T	A	2.682209014892578e-06
chrX	6294725	T	C	5.0067901611328125e-06
chrX	6294725	T	G	0.0
chrX	6294726	T	A	1.1920928955078125e-06
chrX	6294726	T	C	5.185604095458984e-06
chrX	6294726	T	G	6.139278411865234e-06
chrX	6294727	T	A	-3.3974647521972656e-06
chrX	6294727	T	C	5.0067901611328125e-06
chrX	6294727	T	G	2.205371856689453e-06
chrX	6294728	G	A	-2.384185791015625e-06
chrX	6294728	G	C	-3.516674041748047e-06
chrX	6294728	G	T	-1.1324882507324219e-06
chrX	6294729	A	C	1.0728836059570312e-06
chrX	6294729	A	G	2.205371856689453e-06
chrX	6294729	A	T	3.5762786865234375e-07
chrX	6294730	G	A	-2.86102294921875e-06
chrX	6294730	G	C	-3.7550926208496094e-06
chrX	6294730	G	T	1.9669532775878906e-06
chrX	6294731	T	A	1.1920928955078125e-07
chrX	6294731	T	C	1.8477439880371094e-06
chrX	6294731	T	G	1.7285346984863281e-06
chrX	6294732	T	A	-4.351139068603516e-06
chrX	6294732	T	C	-4.76837158203125e-07
chrX	6294732	T	G	-2.980232238769531e-07
chrX	6294733	T	A	-4.708766937255859e-06
chrX	6294733	T	C	-4.231929779052734e-06
chrX	6294733	T	G	2.980232238769531e-07
chrX	6294734	T	A	-7.569789886474609e-06
chrX	6294734	T	C	8.940696716308594e-07
chrX	6294734	T	G	2.562999725341797e-06
chrX	6294735	G	A	-3.5762786865234375e-07
chrX	6294735	G	C	-1.8477439880371094e-06
chrX	6294735	G	T	-4.351139068603516e-06
chrX	6294736	A	C	-7.808208465576172e-06
chrX	6294736	A	G	-3.635883331298828e-06
chrX	6294736	A	T	-6.318092346191406e-06
chrX	6294737	G	A	-8.64267349243164e-06
chrX	6294737	G	C	-4.827976226806641e-06
chrX	6294737	G	T	-1.4901161193847656e-06
chrX	6294738	C	A	2.205371856689453e-06
chrX	6294738	C	G	2.0265579223632812e-06
chrX	6294738	C	T	-4.947185516357422e-06
chrX	6294739	A	C	4.231929779052734e-06
chrX	6294739	A	G	-7.987022399902344e-06
chrX	6294739	A	T	-8.940696716308594e-07
chrX	6294740	G	A	-3.3974647521972656e-06
chrX	6294740	G	C	4.589557647705078e-06
chrX	6294740	G	T	-1.0132789611816406e-06
chrX	6294741	T	A	6.258487701416016e-06
chrX	6294741	T	C	1.233816146850586e-05
chrX	6294741	T	G	-8.940696716308594e-07
chrX	6294742	T	A	6.616115570068359e-06
chrX	6294742	T	C	-1.1324882507324219e-06
chrX	6294742	T	G	-5.304813385009766e-06
chrX	6294743	T	A	8.761882781982422e-06
chrX	6294743	T	C	2.2113323211669922e-05
chrX	6294743	T	G	8.702278137207031e-06
chrX	6294744	T	A	3.039836883544922e-06
chrX	6294744	T	C	1.0788440704345703e-05
chrX	6294744	T	G	6.258487701416016e-06
chrX	6294745	T	A	-5.960464477539063e-08
chrX	6294745	T	C	5.900859832763672e-06
chrX	6294745	T	G	5.543231964111328e-06
chrX	6294746	C	A	-2.562999725341797e-06
chrX	6294746	C	G	1.8477439880371094e-06
chrX	6294746	C	T	-4.231929779052734e-06
chrX	6294747	A	C	9.059906005859375e-06
chrX	6294747	A	G	4.112720489501953e-06
chrX	6294747	A	T	-1.5497207641601562e-06
chrX	6294748	A	C	3.159046173095703e-06
chrX	6294748	A	G	1.0132789611816406e-06
chrX	6294748	A	T	1.1324882507324219e-06
chrX	6294749	A	C	8.106231689453125e-06
chrX	6294749	A	G	6.258487701416016e-06
chrX	6294749	A	T	5.960464477539063e-08
chrX	6294750	A	C	-2.086162567138672e-06
chrX	6294750	A	G	-8.52346420288086e-06
chrX	6294750	A	T	2.4437904357910156e-06
chrX	6294751	T	A	-4.76837158203125e-07
chrX	6294751	T	C	-5.960464477539063e-08
chrX	6294751	T	G	3.2782554626464844e-06
chrX	6294752	G	A	1.7881393432617188e-07
chrX	6294752	G	C	4.470348358154297e-06
chrX	6294752	G	T	-8.165836334228516e-06
chrX	6294753	A	C	7.569789886474609e-06
chrX	6294753	A	G	3.874301910400391e-06
chrX	6294753	A	T	8.463859558105469e-06
chrX	6294754	G	A	5.125999450683594e-06
chrX	6294754	G	C	4.351139068603516e-06
chrX	6294754	G	T	6.556510925292969e-07
chrX	6294755	A	C	1.2993812561035156e-05
chrX	6294755	A	G	1.0013580322265625e-05
chrX	6294755	A	T	7.331371307373047e-06
chrX	6294756	G	A	1.1324882507324219e-06
chrX	6294756	G	C	-1.8477439880371094e-06
chrX	6294756	G	T	3.516674041748047e-06
chrX	6294757	A	C	2.3186206817626953e-05
chrX	6294757	A	G	7.987022399902344e-06
chrX	6294757	A	T	6.854534149169922e-06
chrX	6294758	C	A	-4.708766937255859e-06
chrX	6294758	C	G	-3.2186508178710938e-06
chrX	6294758	C	T	-4.0531158447265625e-06
chrX	6294759	A	C	6.973743438720703e-06
chrX	6294759	A	G	9.298324584960938e-06
chrX	6294759	A	T	-3.4570693969726562e-06
chrX	6294760	A	C	-6.4373016357421875e-06
chrX	6294760	A	G	-2.1457672119140625e-06
chrX	6294760	A	T	-3.7550926208496094e-06
chrX	6294761	A	C	1.6093254089355469e-06
chrX	6294761	A	G	1.2278556823730469e-05
chrX	6294761	A	T	1.7285346984863281e-06
chrX	6294762	A	C	1.2516975402832031e-06
chrX	6294762	A	G	2.4437904357910156e-06
chrX	6294762	A	T	-1.7881393432617188e-06
chrX	6294763	A	C	5.662441253662109e-06
chrX	6294763	A	G	4.76837158203125e-06
chrX	6294763	A	T	-8.940696716308594e-07
chrX	6294764	G	A	-5.304813385009766e-06
chrX	6294764	G	C	-5.364418029785156e-07
chrX	6294764	G	T	-3.0994415283203125e-06
chrX	6294765	T	A	-8.940696716308594e-07
chrX	6294765	T	C	-2.1457672119140625e-06
chrX	6294765	T	G	-6.318092346191406e-06
chrX	6294766	G	A	-7.3909759521484375e-06
chrX	6294766	G	C	3.039836883544922e-06
chrX	6294766	G	T	2.980232238769531e-07
chrX	6294767	G	A	-1.0132789611816406e-06
chrX	6294767	G	C	7.748603820800781e-07
chrX	6294767	G	T	-5.364418029785156e-07
chrX	6294768	A	C	3.3974647521972656e-06
chrX	6294768	A	G	-2.9802322387695312e-06
chrX	6294768	A	T	7.748603820800781e-07
chrX	6294769	C	A	-3.7550926208496094e-06
chrX	6294769	C	G	-1.7285346984863281e-06
chrX	6294769	C	T	-4.827976226806641e-06
chrX	6294770	A	C	4.5299530029296875e-06
chrX	6294770	A	G	1.6093254089355469e-06
chrX	6294770	A	T	8.940696716308594e-07
chrX	6294771	G	A	-4.827976226806641e-06
chrX	6294771	G	C	-6.377696990966797e-06
chrX	6294771	G	T	-1.2814998626708984e-05
chrX	6294772	G	A	-9.417533874511719e-06
chrX	6294772	G	C	1.7285346984863281e-06
chrX	6294772	G	T	-3.4570693969726562e-06
chrX	6294773	A	C	-3.635883331298828e-06
chrX	6294773	A	G	-8.64267349243164e-06
chrX	6294773	A	T	-8.404254913330078e-06
chrX	6294774	T	A	-7.033348083496094e-06
chrX	6294774	T	C	-5.900859832763672e-06
chrX	6294774	T	G	-1.5497207641601562e-06
chrX	6294775	C	A	-7.331371307373047e-06
chrX	6294775	C	G	-1.7881393432617188e-07
chrX	6294775	C	T	-6.4373016357421875e-06
chrX	6294776	T	A	-6.973743438720703e-06
chrX	6294776	T	C	-4.172325134277344e-07
chrX	6294776	T	G	-2.6226043701171875e-06
chrX	6294777	G	A	-3.159046173095703e-06
chrX	6294777	G	C	-3.814697265625e-06
chrX	6294777	G	T	-8.165836334228516e-06
chrX	6294778	A	C	-4.708766937255859e-06
chrX	6294778	A	G	-1.1444091796875e-05
chrX	6294778	A	T	-5.781650543212891e-06
chrX	6294779	G	A	2.4437904357910156e-06
chrX	6294779	G	C	-5.304813385009766e-06
chrX	6294779	G	T	-6.318092346191406e-06
chrX	6294780	G	A	-1.430511474609375e-06
chrX	6294780	G	C	-8.046627044677734e-06
chrX	6294780	G	T	-2.9206275939941406e-06
chrX	6294781	T	A	9.5367431640625e-07
chrX	6294781	T	C	5.364418029785156e-07
chrX	6294781	T	G	-7.271766662597656e-06
chrX	6294782	T	A	3.3974647521972656e-06
chrX	6294782	T	C	-8.344650268554688e-06
chrX	6294782	T	G	-5.066394805908203e-06
chrX	6294783	T	A	1.7285346984863281e-06
chrX	6294783	T	C	2.3245811462402344e-06
chrX	6294783	T	G	2.562999725341797e-06
chrX	6294784	G	A	-8.046627044677734e-06
chrX	6294784	G	C	-1.1742115020751953e-05
chrX	6294784	G	T	-8.404254913330078e-06
chrX	6294785	T	A	1.9073486328125e-06
chrX	6294785	T	C	3.635883331298828e-06
chrX	6294785	T	G	6.258487701416016e-06
chrX	6294786	T	A	-5.543231964111328e-06
chrX	6294786	T	C	-2.980232238769531e-07
chrX	6294786	T	G	3.874301910400391e-06
chrX	6294787	G	A	-4.470348358154297e-06
chrX	6294787	G	C	4.76837158203125e-07
chrX	6294787	G	T	2.4437904357910156e-06
chrX	6294788	T	A	-6.496906280517578e-06
chrX	6294788	T	C	-5.900859832763672e-06
chrX	6294788	T	G	4.112720489501953e-06
chrX	6294789	G	A	-6.973743438720703e-06
chrX	6294789	G	C	5.960464477539063e-08
chrX	6294789	G	T	-4.112720489501953e-06
chrX	6294790	A	C	-9.953975677490234e-06
chrX	6294790	A	G	-1.3709068298339844e-06
chrX	6294790	A	T	-1.3530254364013672e-05
chrX	6294791	A	C	-5.304813385009766e-06
chrX	6294791	A	G	-1.7285346984863281e-06
chrX	6294791	A	T	-4.827976226806641e-06
chrX	6294792	G	A	1.5497207641601562e-06
chrX	6294792	G	C	-4.5299530029296875e-06
chrX	6294792	G	T	4.470348358154297e-06
chrX	6294793	T	A	-4.5299530029296875e-06
chrX	6294793	T	C	-1.3709068298339844e-06
chrX	6294793	T	G	-9.715557098388672e-06
chrX	6294794	T	A	-2.3245811462402344e-06
chrX	6294794	T	C	-6.198883056640625e-06
chrX	6294794	T	G	-1.0013580322265625e-05
chrX	6294795	T	A	4.172325134277344e-07
chrX	6294795	T	C	8.344650268554688e-07
chrX	6294795	T	G	-1.4901161193847656e-06
chrX	6294796	T	A	-3.635883331298828e-06
chrX	6294796	T	C	-6.377696990966797e-06
chrX	6294796	T	G	-8.761882781982422e-06
chrX	6294797	G	A	2.086162567138672e-06
chrX	6294797	G	C	3.2186508178710938e-06
chrX	6294797	G	T	5.781650543212891e-06
chrX	6294798	G	A	-2.9206275939941406e-06
chrX	6294798	G	C	-4.351139068603516e-06
chrX	6294798	G	T	-9.119510650634766e-06
chrX	6294799	G	A	-5.662441253662109e-06
chrX	6294799	G	C	-3.2186508178710938e-06
chrX	6294799	G	T	-6.020069122314453e-06
chrX	6294800	A	C	-6.973743438720703e-06
chrX	6294800	A	G	-1.4007091522216797e-05
chrX	6294800	A	T	-8.285045623779297e-06
chrX	6294801	A	C	-3.3974647521972656e-06
chrX	6294801	A	G	9.119510650634766e-06
chrX	6294801	A	T	7.927417755126953e-06
chrX	6294802	C	A	-1.1801719665527344e-05
chrX	6294802	C	G	2.3245811462402344e-06
chrX	6294802	C	T	-2.980232238769531e-07
chrX	6294803	T	A	-3.159046173095703e-06
chrX	6294803	T	C	6.973743438720703e-06
chrX	6294803	T	G	8.58306884765625e-06
chrX	6294804	A	C	-3.7550926208496094e-06
chrX	6294804	A	G	1.8477439880371094e-06
chrX	6294804	A	T	-2.0265579223632812e-06
chrX	6294805	A	C	1.2576580047607422e-05
chrX	6294805	A	G	-7.62939453125e-06
chrX	6294805	A	T	1.430511474609375e-06
chrX	6294806	G	A	4.231929779052734e-06
chrX	6294806	G	C	-5.185604095458984e-06
chrX	6294806	G	T	5.900859832763672e-06
chrX	6294807	T	A	-5.7220458984375e-06
chrX	6294807	T	C	5.424022674560547e-06
chrX	6294807	T	G	-1.7285346984863281e-06
chrX	6294808	C	A	-8.64267349243164e-06
chrX	6294808	C	G	-6.556510925292969e-07
chrX	6294808	C	T	-2.8014183044433594e-06
chrX	6294809	G	A	-6.67572021484375e-06
chrX	6294809	G	C	-1.6093254089355469e-06
chrX	6294809	G	T	5.304813385009766e-06
chrX	6294810	T	A	4.827976226806641e-06
chrX	6294810	T	C	5.424022674560547e-06
chrX	6294810	T	G	6.496906280517578e-06
chrX	6294811	A	C	1.430511474609375e-06
chrX	6294811	A	G	-5.424022674560547e-06
chrX	6294811	A	T	-6.556510925292969e-07
chrX	6294812	A	C	4.231929779052734e-06
chrX	6294812	A	G	4.827976226806641e-06
chrX	6294812	A	T	3.874301910400391e-06
chrX	6294813	G	A	5.4836273193359375e-06
chrX	6294813	G	C	1.3709068298339844e-06
chrX	6294813	G	T	6.020069122314453e-06
chrX	6294814	A	C	1.2099742889404297e-05
chrX	6294814	A	G	6.496906280517578e-06
chrX	6294814	A	T	7.748603820800781e-06
chrX	6294815	C	A	6.735324859619141e-06
chrX	6294815	C	G	5.304813385009766e-06
chrX	6294815	C	T	7.331371307373047e-06
chrX	6294816	T	A	1.7881393432617188e-07
chrX	6294816	T	C	1.1563301086425781e-05
chrX	6294816	T	G	9.417533874511719e-06
chrX	6294817	A	C	-7.748603820800781e-07
chrX	6294817	A	G	8.106231689453125e-06
chrX	6294817	A	T	2.682209014892578e-06
chrX	6294818	T	A	-1.4901161193847656e-06
chrX	6294818	T	C	1.1920928955078125e-06
chrX	6294818	T	G	5.662441253662109e-06
chrX	6294819	T	A	7.152557373046875e-07
chrX	6294819	T	C	-1.7881393432617188e-07
chrX	6294819	T	G	9.834766387939453e-06
chrX	6294820	A	C	3.635883331298828e-06
chrX	6294820	A	G	6.735324859619141e-06
chrX	6294820	A	T	3.5762786865234375e-07
chrX	6294821	G	A	-9.357929229736328e-06
chrX	6294821	G	C	-1.1980533599853516e-05
chrX	6294821	G	T	-5.543231964111328e-06
chrX	6294822	T	A	-1.3768672943115234e-05
chrX	6294822	T	C	-9.119510650634766e-06
chrX	6294822	T	G	-6.67572021484375e-06
chrX	6294823	A	C	-6.735324859619141e-06
chrX	6294823	A	G	-2.980232238769531e-07
chrX	6294823	A	T	-8.404254913330078e-06
chrX	6294824	A	C	-4.589557647705078e-06
chrX	6294824	A	G	-9.000301361083984e-06
chrX	6294824	A	T	-7.68899917602539e-06
chrX	6294825	G	A	-5.304813385009766e-06
chrX	6294825	G	C	-7.092952728271484e-06
chrX	6294825	G	T	-4.470348358154297e-06
chrX	6294826	T	A	1.9073486328125e-06
chrX	6294826	T	C	-1.4901161193847656e-06
chrX	6294826	T	G	-2.86102294921875e-06
chrX	6294827	T	A	-2.9802322387695312e-06
chrX	6294827	T	C	-7.867813110351562e-06
chrX	6294827	T	G	-8.940696716308594e-07
chrX	6294828	C	A	-2.980232238769531e-07
chrX	6294828	C	G	7.092952728271484e-06
chrX	6294828	C	T	1.5795230865478516e-05
chrX	6294829	T	A	-1.0073184967041016e-05
chrX	6294829	T	C	-3.874301910400391e-06
chrX	6294829	T	G	4.589557647705078e-06
chrX	6294830	A	C	-3.516674041748047e-06
chrX	6294830	A	G	-1.055002212524414e-05
chrX	6294830	A	T	3.2186508178710938e-06
chrX	6294831	A	C	0.0
chrX	6294831	A	G	-1.3530254364013672e-05
chrX	6294831	A	T	2.384185791015625e-07
chrX	6294832	G	A	7.808208465576172e-06
chrX	6294832	G	C	-1.1324882507324219e-06
chrX	6294832	G	T	7.212162017822266e-06
chrX	6294833	T	A	-5.185604095458984e-06
chrX	6294833	T	C	2.384185791015625e-06
chrX	6294833	T	G	-7.748603820800781e-06
chrX	6294834	G	A	3.5762786865234375e-06
chrX	6294834	G	C	9.953975677490234e-06
chrX	6294834	G	T	1.2218952178955078e-05
chrX	6294835	T	A	-8.940696716308594e-07
chrX	6294835	T	C	-3.5762786865234375e-07
chrX	6294835	T	G	3.039836883544922e-06
chrX	6294836	C	A	1.5437602996826172e-05
chrX	6294836	C	G	1.3053417205810547e-05
chrX	6294836	C	T	1.2993812561035156e-05
chrX	6294837	A	C	-4.589557647705078e-06
chrX	6294837	A	G	1.1861324310302734e-05
chrX	6294837	A	T	-7.748603820800781e-07
chrX	6294838	A	C	-6.020069122314453e-06
chrX	6294838	A	G	-1.6093254089355469e-06
chrX	6294838	A	T	-8.344650268554688e-07
chrX	6294839	A	C	-5.066394805908203e-06
chrX	6294839	A	G	-8.940696716308594e-07
chrX	6294839	A	T	-9.5367431640625e-07
chrX	6294840	G	A	5.543231964111328e-06
chrX	6294840	G	C	-1.9669532775878906e-06
chrX	6294840	G	T	4.231929779052734e-06
chrX	6294841	T	A	3.6954879760742188e-06
chrX	6294841	T	C	1.0788440704345703e-05
chrX	6294841	T	G	-4.708766937255859e-06
chrX	6294842	G	A	7.569789886474609e-06
chrX	6294842	G	C	4.5299530029296875e-06
chrX	6294842	G	T	1.0132789611816406e-06
chrX	6294843	T	A	-5.662441253662109e-06
chrX	6294843	T	C	-4.172325134277344e-07
chrX	6294843	T	G	-2.205371856689453e-06
chrX	6294844	T	A	2.086162567138672e-06
chrX	6294844	T	C	-6.318092346191406e-06
chrX	6294844	T	G	-8.52346420288086e-06
chrX	6294845	A	C	-8.64267349243164e-06
chrX	6294845	A	G	-1.6093254089355469e-06
chrX	6294845	A	T	-4.470348358154297e-06
chrX	6294846	A	C	-1.0669231414794922e-05
chrX	6294846	A	G	-4.76837158203125e-06
chrX	6294846	A	T	-3.7550926208496094e-06
chrX	6294847	A	C	-1.5616416931152344e-05
chrX	6294847	A	G	3.5762786865234375e-07
chrX	6294847	A	T	1.2516975402832031e-06
chrX	6294848	T	A	-4.947185516357422e-06
chrX	6294848	T	C	-1.329183578491211e-05
chrX	6294848	T	G	-1.245737075805664e-05
chrX	6294849	A	C	-2.9802322387695312e-06
chrX	6294849	A	G	-2.0265579223632812e-06
chrX	6294849	A	T	6.556510925292969e-07
chrX	6294850	C	A	-1.138448715209961e-05
chrX	6294850	C	G	-1.4543533325195312e-05
chrX	6294850	C	T	-5.066394805908203e-06
chrX	6294851	G	A	8.344650268554688e-07
chrX	6294851	G	C	-8.046627044677734e-06
chrX	6294851	G	T	-1.055002212524414e-05
chrX	6294852	T	A	2.1457672119140625e-06
chrX	6294852	T	C	-7.569789886474609e-06
chrX	6294852	T	G	-2.4437904357910156e-06
chrX	6294853	T	A	-6.4373016357421875e-06
chrX	6294853	T	C	-1.5139579772949219e-05
chrX	6294853	T	G	-5.4836273193359375e-06
chrX	6294854	T	A	-4.351139068603516e-06
chrX	6294854	T	C	-7.033348083496094e-06
chrX	6294854	T	G	-6.020069122314453e-06
chrX	6294855	C	A	9.5367431640625e-07
chrX	6294855	C	G	-4.231929779052734e-06
chrX	6294855	C	T	3.635883331298828e-06
chrX	6294856	A	C	-1.1324882507324219e-05
chrX	6294856	A	G	-8.106231689453125e-06
chrX	6294856	A	T	-7.331371307373047e-06
chrX	6294857	A	C	-4.827976226806641e-06
chrX	6294857	A	G	-1.1205673217773438e-05
chrX	6294857	A	T	-7.748603820800781e-07
chrX	6294858	A	C	-1.0073184967041016e-05
chrX	6294858	A	G	-7.033348083496094e-06
chrX	6294858	A	T	-1.7285346984863281e-06
chrX	6294859	A	C	-6.496906280517578e-06
chrX	6294859	A	G	-1.5914440155029297e-05
chrX	6294859	A	T	3.039836883544922e-06
chrX	6294860	T	A	-2.3245811462402344e-06
chrX	6294860	T	C	-8.285045623779297e-06
chrX	6294860	T	G	-1.1622905731201172e-05
chrX	6294861	T	A	3.2782554626464844e-06
chrX	6294861	T	C	-1.150369644165039e-05
chrX	6294861	T	G	-1.245737075805664e-05
chrX	6294862	T	A	1.2516975402832031e-06
chrX	6294862	T	C	-9.47713851928711e-06
chrX	6294862	T	G	-1.4781951904296875e-05
chrX	6294863	T	A	1.1920928955078125e-06
chrX	6294863	T	C	-1.1861324310302734e-05
chrX	6294863	T	G	-7.212162017822266e-06
chrX	6294864	T	A	-7.748603820800781e-07
chrX	6294864	T	C	-9.953975677490234e-06
chrX	6294864	T	G	-1.329183578491211e-05
chrX	6294865	A	C	-1.3709068298339844e-06
chrX	6294865	A	G	-1.531839370727539e-05
chrX	6294865	A	T	-5.543231964111328e-06
chrX	6294866	A	C	-7.152557373046875e-06
chrX	6294866	A	G	-6.556510925292969e-06
chrX	6294866	A	T	-4.351139068603516e-06
chrX	6294867	T	A	-1.2814998626708984e-05
chrX	6294867	T	C	-1.329183578491211e-05
chrX	6294867	T	G	-4.589557647705078e-06
chrX	6294868	C	A	-1.0907649993896484e-05
chrX	6294868	C	G	-7.331371307373047e-06
chrX	6294868	C	T	-1.6510486602783203e-05
chrX	6294869	A	C	-6.020069122314453e-06
chrX	6294869	A	G	-8.761882781982422e-06
chrX	6294869	A	T	-1.710653305053711e-05
chrX	6294870	G	A	-2.0325183868408203e-05
chrX	6294870	G	C	-1.5437602996826172e-05
chrX	6294870	G	T	-1.043081283569336e-05
chrX	6294871	A	C	-6.67572021484375e-06
chrX	6294871	A	G	9.5367431640625e-06
chrX	6294871	A	T	-4.708766937255859e-06
chrX	6294872	A	C	-4.589557647705078e-06
chrX	6294872	A	G	1.7881393432617188e-07
chrX	6294872	A	T	4.887580871582031e-06
chrX	6294873	A	C	3.039836883544922e-06
chrX	6294873	A	G	-5.364418029785156e-07
chrX	6294873	A	T	2.205371856689453e-06
chrX	6294874	A	C	4.470348358154297e-06
chrX	6294874	A	G	1.7881393432617188e-07
chrX	6294874	A	T	2.3245811462402344e-06
chrX	6294875	T	A	7.331371307373047e-06
chrX	6294875	T	C	7.450580596923828e-06
chrX	6294875	T	G	-3.2186508178710938e-06
chrX	6294876	T	A	1.1324882507324219e-05
chrX	6294876	T	C	1.7821788787841797e-05
chrX	6294876	T	G	6.735324859619141e-06
chrX	6294877	T	A	6.496906280517578e-06
chrX	6294877	T	C	1.0073184967041016e-05
chrX	6294877	T	G	-7.152557373046875e-06
chrX	6294878	T	A	6.020069122314453e-06
chrX	6294878	T	C	-7.450580596923828e-06
chrX	6294878	T	G	-5.304813385009766e-06
chrX	6294879	A	C	-6.198883056640625e-06
chrX	6294879	A	G	-8.64267349243164e-06
chrX	6294879	A	T	3.5762786865234375e-07
chrX	6294880	A	C	1.1324882507324219e-05
chrX	6294880	A	G	-7.987022399902344e-06
chrX	6294880	A	T	8.761882781982422e-06
chrX	6294881	A	C	1.7285346984863281e-06
chrX	6294881	A	G	1.0132789611816406e-06
chrX	6294881	A	T	1.2516975402832031e-05
chrX	6294882	C	A	4.947185516357422e-06
chrX	6294882	C	G	4.172325134277344e-07
chrX	6294882	C	T	6.020069122314453e-06
chrX	6294883	C	A	4.5299530029296875e-06
chrX	6294883	C	G	1.043081283569336e-05
chrX	6294883	C	T	1.9669532775878906e-06
chrX	6294884	A	C	-4.947185516357422e-06
chrX	6294884	A	G	-1.3709068298339844e-06
chrX	6294884	A	T	-6.139278411865234e-06
chrX	6294885	T	A	-7.450580596923828e-06
chrX	6294885	T	C	2.8014183044433594e-06
chrX	6294885	T	G	-1.5795230865478516e-05
chrX	6294886	G	A	4.231929779052734e-06
chrX	6294886	G	C	1.5437602996826172e-05
chrX	6294886	G	T	1.2695789337158203e-05
chrX	6294887	G	A	1.1146068572998047e-05
chrX	6294887	G	C	5.304813385009766e-06
chrX	6294887	G	T	-4.112720489501953e-06
chrX	6294888	C	A	2.3186206817626953e-05
chrX	6294888	C	G	3.039836883544922e-06
chrX	6294888	C	T	6.377696990966797e-06
chrX	6294889	T	A	1.531839370727539e-05
chrX	6294889	T	C	-4.708766937255859e-06
chrX	6294889	T	G	5.245208740234375e-06
chrX	6294890	A	C	5.304813385009766e-06
chrX	6294890	A	G	8.046627044677734e-06
chrX	6294890	A	T	1.7464160919189453e-05
chrX	6294891	C	A	1.2755393981933594e-05
chrX	6294891	C	G	6.496906280517578e-06
chrX	6294891	C	T	1.1026859283447266e-05
chrX	6294892	A	C	8.881092071533203e-06
chrX	6294892	A	G	9.298324584960938e-06
chrX	6294892	A	T	8.761882781982422e-06
chrX	6294893	G	A	1.6868114471435547e-05
chrX	6294893	G	C	8.404254913330078e-06
chrX	6294893	G	T	1.4722347259521484e-05
chrX	6294894	T	A	1.33514404296875e-05
chrX	6294894	T	C	1.4960765838623047e-05
chrX	6294894	T	G	5.900859832763672e-06
chrX	6294895	T	A	-9.59634780883789e-06
chrX	6294895	T	C	5.960464477539063e-08
chrX	6294895	T	G	-4.589557647705078e-06
chrX	6294896	T	A	2.0265579223632812e-06
chrX	6294896	T	C	-1.4603137969970703e-05
chrX	6294896	T	G	-7.331371307373047e-06
chrX	6294897	T	A	-8.940696716308594e-07
chrX	6294897	T	C	-1.0311603546142578e-05
chrX	6294897	T	G	-4.589557647705078e-06
chrX	6294898	G	A	-6.556510925292969e-07
chrX	6294898	G	C	-1.6391277313232422e-05
chrX	6294898	G	T	3.516674041748047e-06
chrX	6294899	A	C	-2.8431415557861328e-05
chrX	6294899	A	G	1.1622905731201172e-05
chrX	6294899	A	T	-3.993511199951172e-06
chrX	6294900	A	C	-5.781650543212891e-06
chrX	6294900	A	G	3.3974647521972656e-06
chrX	6294900	A	T	3.159046173095703e-06
chrX	6294901	T	A	-3.5762786865234375e-07
chrX	6294901	T	C	-2.9802322387695312e-06
chrX	6294901	T	G	1.0788440704345703e-05
chrX	6294902	T	A	1.1742115020751953e-05
chrX	6294902	T	C	4.887580871582031e-06
chrX	6294902	T	G	-2.980232238769531e-07
chrX	6294903	T	A	2.980232238769531e-07
chrX	6294903	T	C	3.516674041748047e-06
chrX	6294903	T	G	-2.205371856689453e-06
chrX	6294904	G	A	1.1742115020751953e-05
chrX	6294904	G	C	2.4437904357910156e-06
chrX	6294904	G	T	4.827976226806641e-06
chrX	6294905	A	C	4.708766937255859e-06
chrX	6294905	A	G	-9.5367431640625e-07
chrX	6294905	A	T	4.887580871582031e-06
chrX	6294906	T	A	-5.185604095458984e-06
chrX	6294906	T	C	1.6093254089355469e-06
chrX	6294906	T	G	-5.304813385009766e-06
chrX	6294907	T	A	-8.761882781982422e-06
chrX	6294907	T	C	-9.000301361083984e-06
chrX	6294907	T	G	-1.9848346710205078e-05
chrX	6294908	T	A	5.900859832763672e-06
chrX	6294908	T	C	5.543231964111328e-06
chrX	6294908	T	G	-1.430511474609375e-05
chrX	6294909	C	A	1.2516975402832031e-05
chrX	6294909	C	G	1.2099742889404297e-05
chrX	6294909	C	T	1.0073184967041016e-05
chrX	6294910	A	C	-1.6093254089355469e-06
chrX	6294910	A	G	2.086162567138672e-06
chrX	6294910	A	T	6.258487701416016e-06
chrX	6294911	G	A	-5.781650543212891e-06
chrX	6294911	G	C	-2.5570392608642578e-05
chrX	6294911	G	T	-6.020069122314453e-06
chrX	6294912	A	C	-1.1742115020751953e-05
chrX	6294912	A	G	-6.4373016357421875e-06
chrX	6294912	A	T	-1.7344951629638672e-05
chrX	6294913	G	A	7.450580596923828e-06
chrX	6294913	G	C	-1.9669532775878906e-06
chrX	6294913	G	T	6.258487701416016e-06
chrX	6294914	T	A	-1.0132789611816406e-06
chrX	6294914	T	C	-1.2516975402832031e-06
chrX	6294914	T	G	-1.6391277313232422e-05
chrX	6294915	T	A	-1.7940998077392578e-05
chrX	6294915	T	C	-1.1622905731201172e-05
chrX	6294915	T	G	-8.881092071533203e-06
chrX	6294916	G	A	7.927417755126953e-06
chrX	6294916	G	C	-3.993511199951172e-06
chrX	6294916	G	T	6.4373016357421875e-06
chrX	6294917	A	C	-8.52346420288086e-06
chrX	6294917	A	G	-3.123283386230469e-05
chrX	6294917	A	T	8.940696716308594e-07
chrX	6294918	C	A	5.960464477539063e-08
chrX	6294918	C	G	9.834766387939453e-06
chrX	6294918	C	T	4.649162292480469e-06
chrX	6294919	C	A	-1.7881393432617188e-07
chrX	6294919	C	G	-2.3245811462402344e-06
chrX	6294919	C	T	4.887580871582031e-06
chrX	6294920	T	A	3.159046173095703e-06
chrX	6294920	T	C	2.205371856689453e-06
chrX	6294920	T	G	-5.424022674560547e-06
chrX	6294921	T	A	-4.947185516357422e-06
chrX	6294921	T	C	1.7881393432617188e-07
chrX	6294921	T	G	-7.62939453125e-06
chrX	6294922	A	C	1.7464160919189453e-05
chrX	6294922	A	G	6.4373016357421875e-06
chrX	6294922	A	T	3.993511199951172e-06
chrX	6294923	T	A	1.7881393432617188e-06
chrX	6294923	T	C	-5.960464477539063e-08
chrX	6294923	T	G	1.8477439880371094e-06
chrX	6294924	A	C	-2.9325485229492188e-05
chrX	6294924	A	G	-9.59634780883789e-06
chrX	6294924	A	T	-1.2040138244628906e-05
chrX	6294925	G	A	-1.9550323486328125e-05
chrX	6294925	G	C	5.364418029785156e-07
chrX	6294925	G	T	-9.238719940185547e-06
chrX	6294926	G	A	-8.52346420288086e-06
chrX	6294926	G	C	-1.4901161193847656e-06
chrX	6294926	G	T	-1.1801719665527344e-05
chrX	6294927	A	C	-1.6033649444580078e-05
chrX	6294927	A	G	-1.7702579498291016e-05
chrX	6294927	A	T	-1.7881393432617188e-06
chrX	6294928	G	A	-5.424022674560547e-06
chrX	6294928	G	C	-1.3649463653564453e-05
chrX	6294928	G	T	-7.62939453125e-06
chrX	6294929	C	A	5.900859832763672e-06
chrX	6294929	C	G	-1.4960765838623047e-05
chrX	6294929	C	T	4.589557647705078e-06
chrX	6294930	G	A	-1.615285873413086e-05
chrX	6294930	G	C	-9.119510650634766e-06
chrX	6294930	G	T	-6.020069122314453e-06
chrX	6294931	C	A	-1.4901161193847656e-06
chrX	6294931	C	G	1.1146068572998047e-05
chrX	6294931	C	T	5.066394805908203e-06
chrX	6294932	T	A	-2.980232238769531e-07
chrX	6294932	T	C	-3.874301910400391e-06
chrX	6294932	T	G	-9.953975677490234e-06
chrX	6294933	A	C	2.4437904357910156e-06
chrX	6294933	A	G	-4.470348358154297e-06
chrX	6294933	A	T	-2.980232238769531e-07
chrX	6294934	C	A	-1.6033649444580078e-05
chrX	6294934	C	G	-2.3543834686279297e-05
chrX	6294934	C	T	-1.0251998901367188e-05
chrX	6294935	T	A	-9.000301361083984e-06
chrX	6294935	T	C	-2.0503997802734375e-05
chrX	6294935	T	G	1.0728836059570312e-06
chrX	6294936	T	A	-8.404254913330078e-06
chrX	6294936	T	C	-2.0265579223632812e-06
chrX	6294936	T	G	-5.662441253662109e-06
chrX	6294937	T	A	-5.424022674560547e-06
chrX	6294937	T	C	-2.562999725341797e-06
chrX	6294937	T	G	-8.046627044677734e-06
chrX	6294938	T	A	-1.233816146850586e-05
chrX	6294938	T	C	-4.112720489501953e-06
chrX	6294938	T	G	-2.562999725341797e-06
chrX	6294939	G	A	-1.5079975128173828e-05
chrX	6294939	G	C	-1.341104507446289e-05
chrX	6294939	G	T	-8.285045623779297e-06
chrX	6294940	A	C	-5.960464477539062e-07
chrX	6294940	A	G	-2.0265579223632812e-06
chrX	6294940	A	T	-3.4570693969726562e-06
chrX	6294941	A	C	-8.404254913330078e-06
chrX	6294941	A	G	-4.172325134277344e-07
chrX	6294941	A	T	-5.364418029785156e-07
chrX	6294942	T	A	-1.4126300811767578e-05
chrX	6294942	T	C	-4.112720489501953e-06
chrX	6294942	T	G	5.602836608886719e-06
chrX	6294943	A	C	-2.562999725341797e-06
chrX	6294943	A	G	1.0192394256591797e-05
chrX	6294943	A	T	-3.516674041748047e-06
chrX	6294944	A	C	-6.556510925292969e-06
chrX	6294944	A	G	3.039836883544922e-06
chrX	6294944	A	T	-4.708766937255859e-06
chrX	6294945	A	C	-3.6954879760742188e-06
chrX	6294945	A	G	1.7881393432617188e-07
chrX	6294945	A	T	-5.185604095458984e-06
chrX	6294946	A	C	-1.055002212524414e-05
chrX	6294946	A	G	-8.64267349243164e-06
chrX	6294946	A	T	-1.3053417205810547e-05
chrX	6294947	A	C	-1.3709068298339844e-06
chrX	6294947	A	G	-5.364418029785156e-07
chrX	6294947	A	T	-2.682209014892578e-06
chrX	6294948	G	A	-3.039836883544922e-06
chrX	6294948	G	C	-6.496906280517578e-06
chrX	6294948	G	T	-1.9669532775878906e-06
chrX	6294949	T	A	-6.496906280517578e-06
chrX	6294949	T	C	-5.662441253662109e-06
chrX	6294949	T	G	-3.0279159545898438e-05
chrX	6294950	G	A	-5.066394805908203e-06
chrX	6294950	G	C	-2.2232532501220703e-05
chrX	6294950	G	T	-1.6510486602783203e-05
chrX	6294951	T	A	-1.2159347534179688e-05
chrX	6294951	T	C	-1.8477439880371094e-06
chrX	6294951	T	G	-1.531839370727539e-05
chrX	6294952	A	C	-1.4901161193847656e-05
chrX	6294952	A	G	-1.0132789611816406e-05
chrX	6294952	A	T	-1.1146068572998047e-05
chrX	6294953	A	C	-4.708766937255859e-06
chrX	6294953	A	G	1.0132789611816406e-06
chrX	6294953	A	T	-7.3909759521484375e-06
chrX	6294954	C	A	-2.1636486053466797e-05
chrX	6294954	C	G	-1.996755599975586e-05
chrX	6294954	C	T	-1.7940998077392578e-05
chrX	6294955	A	C	-1.4662742614746094e-05
chrX	6294955	A	G	-1.5795230865478516e-05
chrX	6294955	A	T	-5.9604644775390625e-06
chrX	6294956	T	A	-8.165836334228516e-06
chrX	6294956	T	C	2.086162567138672e-06
chrX	6294956	T	G	-1.0311603546142578e-05
chrX	6294957	A	C	9.715557098388672e-06
chrX	6294957	A	G	-5.304813385009766e-06
chrX	6294957	A	T	3.159046173095703e-06
chrX	6294958	A	C	-6.556510925292969e-07
chrX	6294958	A	G	-1.3649463653564453e-05
chrX	6294958	A	T	1.5735626220703125e-05
chrX	6294959	C	A	-1.615285873413086e-05
chrX	6294959	C	G	-1.4185905456542969e-05
chrX	6294959	C	T	-6.556510925292969e-07
chrX	6294960	T	A	1.2218952178955078e-05
chrX	6294960	T	C	4.887580871582031e-06
chrX	6294960	T	G	-1.0132789611816406e-06
chrX	6294961	A	C	1.2993812561035156e-05
chrX	6294961	A	G	-1.3768672943115234e-05
chrX	6294961	A	T	6.318092346191406e-06
chrX	6294962	C	A	6.020069122314453e-06
chrX	6294962	C	G	-2.3245811462402344e-06
chrX	6294962	C	T	1.2516975402832031e-06
chrX	6294963	A	C	7.927417755126953e-06
chrX	6294963	A	G	-1.6689300537109375e-06
chrX	6294963	A	T	1.1622905731201172e-05
chrX	6294964	A	C	-1.7702579498291016e-05
chrX	6294964	A	G	-5.543231964111328e-06
chrX	6294964	A	T	1.0788440704345703e-05
chrX	6294965	A	C	6.616115570068359e-06
chrX	6294965	A	G	1.0311603546142578e-05
chrX	6294965	A	T	1.722574234008789e-05
chrX	6294966	C	A	-2.6226043701171875e-06
chrX	6294966	C	G	1.7881393432617188e-07
chrX	6294966	C	T	9.000301361083984e-06
chrX	6294967	C	A	-4.827976226806641e-06
chrX	6294967	C	G	4.827976226806641e-06
chrX	6294967	C	T	-8.165836334228516e-06
chrX	6294968	A	C	-1.8298625946044922e-05
chrX	6294968	A	G	5.781650543212891e-06
chrX	6294968	A	T	4.827976226806641e-06
chrX	6294969	G	A	-4.947185516357422e-06
chrX	6294969	G	C	-1.817941665649414e-05
chrX	6294969	G	T	1.0132789611816406e-05
chrX	6294970	C	A	-4.0531158447265625e-06
chrX	6294970	C	G	-2.2351741790771484e-05
chrX	6294970	C	T	5.960464477539062e-07
chrX	6294971	C	A	1.9669532775878906e-06
chrX	6294971	C	G	-1.7762184143066406e-05
chrX	6294971	C	T	5.781650543212891e-06
chrX	6294972	T	A	3.993511199951172e-06
chrX	6294972	T	C	-8.046627044677734e-06
chrX	6294972	T	G	-5.304813385009766e-06
chrX	6294973	C	A	-1.6093254089355469e-06
chrX	6294973	C	G	-1.4722347259521484e-05
chrX	6294973	C	T	4.76837158203125e-06
chrX	6294974	C	A	-1.0192394256591797e-05
chrX	6294974	C	G	-2.1338462829589844e-05
chrX	6294974	C	T	-7.271766662597656e-06
chrX	6294975	G	A	-1.7285346984863281e-06
chrX	6294975	G	C	8.940696716308594e-07
chrX	6294975	G	T	-3.874301910400391e-06
chrX	6294976	A	C	-3.2186508178710938e-06
chrX	6294976	A	G	-1.3649463653564453e-05
chrX	6294976	A	T	8.344650268554688e-07
chrX	6294977	T	A	-4.827976226806641e-06
chrX	6294977	T	C	-6.496906280517578e-06
chrX	6294977	T	G	-1.4483928680419922e-05
chrX	6294978	T	A	-1.245737075805664e-05
chrX	6294978	T	C	-5.900859832763672e-06
chrX	6294978	T	G	-4.470348358154297e-06
chrX	6294979	G	A	-5.364418029785156e-07
chrX	6294979	G	C	5.960464477539062e-07
chrX	6294979	G	T	-5.066394805908203e-06
chrX	6294980	C	A	5.960464477539063e-08
chrX	6294980	C	G	-1.9669532775878906e-05
chrX	6294980	C	T	3.516674041748047e-06
chrX	6294981	T	A	-2.187490463256836e-05
chrX	6294981	T	C	-1.436471939086914e-05
chrX	6294981	T	G	-3.451108932495117e-05
chrX	6294982	G	A	-9.953975677490234e-06
chrX	6294982	G	C	1.3530254364013672e-05
chrX	6294982	G	T	-1.5795230865478516e-05
chrX	6294983	T	A	-9.47713851928711e-06
chrX	6294983	T	C	3.159046173095703e-06
chrX	6294983	T	G	-5.066394805908203e-06
chrX	6294984	A	C	-2.384185791015625e-06
chrX	6294984	A	G	3.5762786865234375e-06
chrX	6294984	A	T	-2.2649765014648438e-06
chrX	6294985	A	C	1.245737075805664e-05
chrX	6294985	A	G	1.817941665649414e-05
chrX	6294985	A	T	5.781650543212891e-06
chrX	6294986	A	C	1.7762184143066406e-05
chrX	6294986	A	G	1.2993812561035156e-05
chrX	6294986	A	T	0.0
chrX	6294987	A	C	-1.0073184967041016e-05
chrX	6294987	A	G	9.655952453613281e-06
chrX	6294987	A	T	1.1920928955078125e-07
chrX	6294988	C	A	6.020069122314453e-06
chrX	6294988	C	G	-1.1324882507324219e-06
chrX	6294988	C	T	4.947185516357422e-06
chrX	6294989	A	C	-1.0967254638671875e-05
chrX	6294989	A	G	-1.1980533599853516e-05
chrX	6294989	A	T	-1.3709068298339844e-06
chrX	6294990	G	A	-1.7285346984863281e-06
chrX	6294990	G	C	-1.1682510375976562e-05
chrX	6294990	G	T	5.066394805908203e-06
chrX	6294991	A	C	-5.066394805908203e-06
chrX	6294991	A	G	-8.404254913330078e-06
chrX	6294991	A	T	8.046627044677734e-06
chrX	6294992	A	C	5.0067901611328125e-06
chrX	6294992	A	G	2.9206275939941406e-06
chrX	6294992	A	T	1.7821788787841797e-05
chrX	6294993	C	A	2.7120113372802734e-05
chrX	6294993	C	G	1.3113021850585938e-05
chrX	6294993	C	T	2.3305416107177734e-05
chrX	6294994	T	A	4.589557647705078e-06
chrX	6294994	T	C	1.2516975402832031e-05
chrX	6294994	T	G	-3.993511199951172e-06
chrX	6294995	G	A	4.708766937255859e-06
chrX	6294995	G	C	-1.9669532775878906e-06
chrX	6294995	G	T	-9.59634780883789e-06
chrX	6294996	T	A	-1.0371208190917969e-05
chrX	6294996	T	C	-7.748603820800781e-07
chrX	6294996	T	G	-7.748603820800781e-07
chrX	6294997	C	A	1.9371509552001953e-05
chrX	6294997	C	G	2.2470951080322266e-05
chrX	6294997	C	T	7.867813110351562e-06
chrX	6294998	A	C	-1.9490718841552734e-05
chrX	6294998	A	G	-1.0788440704345703e-05
chrX	6294998	A	T	6.496906280517578e-06
chrX	6294999	G	A	2.092123031616211e-05
chrX	6294999	G	C	2.682209014892578e-06
chrX	6294999	G	T	1.245737075805664e-05
chrX	6295000	C	A	7.748603820800781e-07
chrX	6295000	C	G	1.2874603271484375e-05
chrX	6295000	C	T	1.2993812561035156e-05
chrX	6295001	A	C	8.344650268554688e-07
chrX	6295001	A	G	-1.627206802368164e-05
chrX	6295001	A	T	3.516674041748047e-06
chrX	6295002	A	C	-1.0967254638671875e-05
chrX	6295002	A	G	1.2516975402832031e-06
chrX	6295002	A	T	9.357929229736328e-06
chrX	6295003	A	C	5.662441253662109e-06
chrX	6295003	A	G	-2.9206275939941406e-06
chrX	6295003	A	T	5.424022674560547e-06
chrX	6295004	A	C	-4.094839096069336e-05
chrX	6295004	A	G	2.0205974578857422e-05
chrX	6295004	A	T	3.039836883544922e-06
chrX	6295005	T	A	6.377696990966797e-06
chrX	6295005	T	C	-6.258487701416016e-06
chrX	6295005	T	G	-3.0994415283203125e-06
chrX	6295006	A	C	-9.715557098388672e-06
chrX	6295006	A	G	-8.344650268554688e-07
chrX	6295006	A	T	5.960464477539063e-08
chrX	6295007	G	A	-6.556510925292969e-07
chrX	6295007	G	C	-4.827976226806641e-06
chrX	6295007	G	T	-7.748603820800781e-07
chrX	6295008	G	A	-5.781650543212891e-06
chrX	6295008	G	C	-1.627206802368164e-05
chrX	6295008	G	T	2.205371856689453e-06
chrX	6295009	A	C	-1.3172626495361328e-05
chrX	6295009	A	G	-1.6093254089355469e-06
chrX	6295009	A	T	6.735324859619141e-06
chrX	6295010	A	C	-1.1086463928222656e-05
chrX	6295010	A	G	-1.0371208190917969e-05
chrX	6295010	A	T	4.5299530029296875e-06
chrX	6295011	A	C	-8.344650268554688e-06
chrX	6295011	A	G	-1.9669532775878906e-06
chrX	6295011	A	T	2.682209014892578e-06
chrX	6295012	C	A	-2.1755695343017578e-05
chrX	6295012	C	G	3.635883331298828e-06
chrX	6295012	C	T	-1.1563301086425781e-05
chrX	6295013	T	A	-1.4781951904296875e-05
chrX	6295013	T	C	-2.2351741790771484e-05
chrX	6295013	T	G	-2.187490463256836e-05
chrX	6295014	T	A	-7.748603820800781e-07
chrX	6295014	T	C	-7.569789886474609e-06
chrX	6295014	T	G	-1.329183578491211e-05
chrX	6295015	C	A	1.4841556549072266e-05
chrX	6295015	C	G	5.304813385009766e-06
chrX	6295015	C	T	8.046627044677734e-06
chrX	6295016	A	C	-4.112720489501953e-06
chrX	6295016	A	G	-1.7285346984863281e-06
chrX	6295016	A	T	1.7285346984863281e-06
chrX	6295017	A	C	-4.351139068603516e-06
chrX	6295017	A	G	-9.119510650634766e-06
chrX	6295017	A	T	8.881092071533203e-06
chrX	6295018	T	A	1.0728836059570312e-06
chrX	6295018	T	C	1.3709068298339844e-06
chrX	6295018	T	G	-7.212162017822266e-06
chrX	6295019	T	A	-3.6954879760742188e-06
chrX	6295019	T	C	-2.664327621459961e-05
chrX	6295019	T	G	-2.8431415557861328e-05
chrX	6295020	A	C	-2.7060508728027344e-05
chrX	6295020	A	G	-2.1576881408691406e-05
chrX	6295020	A	T	1.8477439880371094e-06
chrX	6295021	A	C	1.7881393432617188e-07
chrX	6295021	A	G	-7.987022399902344e-06
chrX	6295021	A	T	-1.1920928955078125e-07
chrX	6295022	A	C	-1.9073486328125e-06
chrX	6295022	A	G	-5.304813385009766e-06
chrX	6295022	A	T	9.59634780883789e-06
chrX	6295023	A	C	1.430511474609375e-06
chrX	6295023	A	G	5.364418029785156e-07
chrX	6295023	A	T	5.424022674560547e-06
chrX	6295024	T	A	4.172325134277344e-07
chrX	6295024	T	C	-2.205371856689453e-06
chrX	6295024	T	G	9.834766387939453e-06
chrX	6295025	T	A	1.0907649993896484e-05
chrX	6295025	T	C	-1.722574234008789e-05
chrX	6295025	T	G	6.616115570068359e-06
chrX	6295026	T	A	2.950429916381836e-05
chrX	6295026	T	C	-1.9609928131103516e-05
chrX	6295026	T	G	1.150369644165039e-05
chrX	6295027	G	A	1.424551010131836e-05
chrX	6295027	G	C	-3.6954879760742188e-06
chrX	6295027	G	T	8.404254913330078e-06
chrX	6295028	G	A	-2.205371856689453e-06
chrX	6295028	G	C	-1.5854835510253906e-05
chrX	6295028	G	T	7.68899917602539e-06
chrX	6295029	C	A	-1.9431114196777344e-05
chrX	6295029	C	G	7.212162017822266e-06
chrX	6295029	C	T	2.1755695343017578e-05
chrX	6295030	A	C	-7.808208465576172e-06
chrX	6295030	A	G	-6.496906280517578e-06
chrX	6295030	A	T	-1.7523765563964844e-05
chrX	6295031	A	C	1.519918441772461e-05
chrX	6295031	A	G	1.996755599975586e-05
chrX	6295031	A	T	1.3828277587890625e-05
chrX	6295032	T	A	-1.1324882507324219e-05
chrX	6295032	T	C	7.62939453125e-06
chrX	6295032	T	G	9.715557098388672e-06
chrX	6295033	T	A	-4.708766937255859e-06
chrX	6295033	T	C	5.364418029785156e-07
chrX	6295033	T	G	-1.1980533599853516e-05
chrX	6295034	T	A	-1.3709068298339844e-06
chrX	6295034	T	C	-2.205371856689453e-06
chrX	6295034	T	G	-1.1324882507324219e-05
chrX	6295035	T	A	-8.165836334228516e-06
chrX	6295035	T	C	-4.231929779052734e-06
chrX	6295035	T	G	-1.0967254638671875e-05
chrX	6295036	T	A	-1.0311603546142578e-05
chrX	6295036	T	C	-7.212162017822266e-06
chrX	6295036	T	G	-1.4901161193847656e-05
chrX	6295037	T	A	-4.708766937255859e-06
chrX	6295037	T	C	-3.993511199951172e-06
chrX	6295037	T	G	-1.710653305053711e-05
chrX	6295038	A	C	5.900859832763672e-06
chrX	6295038	A	G	-4.172325134277344e-06
chrX	6295038	A	T	8.285045623779297e-06
chrX	6295039	A	C	1.7285346984863281e-06
chrX	6295039	A	G	-1.0132789611816406e-06
chrX	6295039	A	T	8.106231689453125e-06
chrX	6295040	A	C	1.0907649993896484e-05
chrX	6295040	A	G	1.4603137969970703e-05
chrX	6295040	A	T	1.8775463104248047e-05
chrX	6295041	A	C	1.7464160919189453e-05
chrX	6295041	A	G	2.8192996978759766e-05
chrX	6295041	A	T	2.0384788513183594e-05
chrX	6295042	A	C	1.633167266845703e-05
chrX	6295042	A	G	2.580881118774414e-05
chrX	6295042	A	T	1.8775463104248047e-05
chrX	6295043	G	A	-1.233816146850586e-05
chrX	6295043	G	C	1.0788440704345703e-05
chrX	6295043	G	T	-6.854534149169922e-06
chrX	6295044	T	A	3.635883331298828e-06
chrX	6295044	T	C	9.47713851928711e-06
chrX	6295044	T	G	7.092952728271484e-06
chrX	6295045	T	A	1.3172626495361328e-05
chrX	6295045	T	C	2.008676528930664e-05
chrX	6295045	T	G	2.0563602447509766e-05
chrX	6295046	T	A	1.4841556549072266e-05
chrX	6295046	T	C	2.1636486053466797e-05
chrX	6295046	T	G	4.369020462036133e-05
chrX	6295047	C	A	-3.439188003540039e-05
chrX	6295047	C	G	-2.944469451904297e-05
chrX	6295047	C	T	-2.4974346160888672e-05
chrX	6295048	G	A	-1.7821788787841797e-05
chrX	6295048	G	C	1.5139579772949219e-05
chrX	6295048	G	T	-2.4437904357910156e-06
chrX	6295049	A	C	2.9861927032470703e-05
chrX	6295049	A	G	1.2934207916259766e-05
chrX	6295049	A	T	1.1146068572998047e-05
chrX	6295050	A	C	2.09808349609375e-05
chrX	6295050	A	G	1.7940998077392578e-05
chrX	6295050	A	T	2.568960189819336e-05
chrX	6295051	A	C	4.0531158447265625e-06
chrX	6295051	A	G	9.953975677490234e-06
chrX	6295051	A	T	6.020069122314453e-06
chrX	6295052	C	A	-3.635883331298828e-06
chrX	6295052	C	G	6.854534149169922e-06
chrX	6295052	C	T	1.6093254089355469e-06
chrX	6295053	C	A	-1.7821788787841797e-05
chrX	6295053	C	G	-5.424022674560547e-06
chrX	6295053	C	T	-3.5762786865234375e-06
chrX	6295054	C	A	-8.761882781982422e-06
chrX	6295054	C	G	-7.092952728271484e-06
chrX	6295054	C	T	-6.258487701416016e-06
chrX	6295055	C	A	6.735324859619141e-06
chrX	6295055	C	G	2.759695053100586e-05
chrX	6295055	C	T	1.9073486328125e-06
chrX	6295056	T	A	1.1861324310302734e-05
chrX	6295056	T	C	-1.2516975402832031e-06
chrX	6295056	T	G	1.1622905731201172e-05
chrX	6295057	A	C	-1.3947486877441406e-05
chrX	6295057	A	G	1.1146068572998047e-05
chrX	6295057	A	T	8.940696716308594e-07
chrX	6295058	A	C	-3.165006637573242e-05
chrX	6295058	A	G	4.351139068603516e-06
chrX	6295058	A	T	-2.562999725341797e-06
chrX	6295059	A	C	6.020069122314453e-06
chrX	6295059	A	G	-1.2218952178955078e-05
chrX	6295059	A	T	-1.3172626495361328e-05
chrX	6295060	C	A	5.960464477539062e-07
chrX	6295060	C	G	8.761882781982422e-06
chrX	6295060	C	T	9.715557098388672e-06
chrX	6295061	G	A	-1.7285346984863281e-06
chrX	6295061	G	C	9.715557098388672e-06
chrX	6295061	G	T	6.735324859619141e-06
chrX	6295062	T	A	1.1324882507324219e-06
chrX	6295062	T	C	-9.715557098388672e-06
chrX	6295062	T	G	2.086162567138672e-06
chrX	6295063	T	A	-2.3305416107177734e-05
chrX	6295063	T	C	-1.800060272216797e-05
chrX	6295063	T	G	-3.93986701965332e-05
chrX	6295064	T	A	-2.759695053100586e-05
chrX	6295064	T	C	-3.2842159271240234e-05
chrX	6295064	T	G	-2.1755695343017578e-05
chrX	6295065	T	A	-1.5497207641601562e-05
chrX	6295065	T	C	-2.1278858184814453e-05
chrX	6295065	T	G	2.568960189819336e-05
chrX	6295066	T	A	1.6689300537109375e-05
chrX	6295066	T	C	-1.901388168334961e-05
chrX	6295066	T	G	1.9252300262451172e-05
chrX	6295067	A	C	-8.404254913330078e-06
chrX	6295067	A	G	2.0444393157958984e-05
chrX	6295067	A	T	1.2040138244628906e-05
chrX	6295068	G	A	2.110004425048828e-05
chrX	6295068	G	C	2.1278858184814453e-05
chrX	6295068	G	T	-2.092123031616211e-05
chrX	6295069	C	A	-8.761882781982422e-06
chrX	6295069	C	G	8.225440979003906e-06
chrX	6295069	C	T	8.761882781982422e-06
chrX	6295070	A	C	-9.834766387939453e-06
chrX	6295070	A	G	-5.0008296966552734e-05
chrX	6295070	A	T	1.8477439880371094e-06
chrX	6295071	A	C	6.735324859619141e-06
chrX	6295071	A	G	-3.230571746826172e-05
chrX	6295071	A	T	1.4901161193847656e-06
chrX	6295072	T	A	6.496906280517578e-06
chrX	6295072	T	C	2.8133392333984375e-05
chrX	6295072	T	G	-3.337860107421875e-06
chrX	6295073	T	A	-1.2695789337158203e-05
chrX	6295073	T	C	1.5676021575927734e-05
chrX	6295073	T	G	-2.8073787689208984e-05
chrX	6295074	T	A	-8.940696716308594e-07
chrX	6295074	T	C	-3.838539123535156e-05
chrX	6295074	T	G	-1.2576580047607422e-05
chrX	6295075	G	A	-3.635883331298828e-06
chrX	6295075	G	C	-2.5451183319091797e-05
chrX	6295075	G	T	-6.496906280517578e-06
chrX	6295076	T	A	-4.416704177856445e-05
chrX	6295076	T	C	-3.1113624572753906e-05
chrX	6295076	T	G	-2.0563602447509766e-05
chrX	6295077	A	C	-3.4868717193603516e-05
chrX	6295077	A	G	-1.424551010131836e-05
chrX	6295077	A	T	-1.8417835235595703e-05
chrX	6295078	A	C	-4.4405460357666016e-05
chrX	6295078	A	G	-3.7550926208496094e-06
chrX	6295078	A	T	-1.424551010131836e-05
chrX	6295079	G	A	-1.4483928680419922e-05
chrX	6295079	G	C	-2.2292137145996094e-05
chrX	6295079	G	T	-2.682209014892578e-06
chrX	6295080	A	C	-2.0325183868408203e-05
chrX	6295080	A	G	-3.629922866821289e-05
chrX	6295080	A	T	-1.6629695892333984e-05
chrX	6295081	A	C	-3.6656856536865234e-05
chrX	6295081	A	G	2.1398067474365234e-05
chrX	6295081	A	T	2.5451183319091797e-05
chrX	6295082	C	A	-7.867813110351562e-06
chrX	6295082	C	G	-3.826618194580078e-05
chrX	6295082	C	T	3.3974647521972656e-06
chrX	6295083	T	A	-5.930662155151367e-05
chrX	6295083	T	C	-3.331899642944336e-05
chrX	6295083	T	G	-9.810924530029297e-05
chrX	6295084	T	A	-8.940696716308594e-07
chrX	6295084	T	C	-3.546476364135742e-05
chrX	6295084	T	G	-2.8789043426513672e-05
chrX	6295085	C	A	3.606081008911133e-05
chrX	6295085	C	G	4.231929779052734e-06
chrX	6295085	C	T	8.106231689453125e-06
chrX	6295086	A	C	-2.0444393157958984e-05
chrX	6295086	A	G	-2.187490463256836e-05
chrX	6295086	A	T	-3.4570693969726562e-06
chrX	6295087	A	C	-3.141164779663086e-05
chrX	6295087	A	G	-4.750490188598633e-05
chrX	6295087	A	T	-5.662441253662109e-06
chrX	6295088	T	A	2.4437904357910156e-06
chrX	6295088	T	C	7.808208465576172e-06
chrX	6295088	T	G	1.1026859283447266e-05
chrX	6295089	T	A	1.4126300811767578e-05
chrX	6295089	T	C	-4.45246696472168e-05
chrX	6295089	T	G	-8.404254913330078e-06
chrX	6295090	A	C	2.8014183044433594e-05
chrX	6295090	A	G	1.5914440155029297e-05
chrX	6295090	A	T	1.1742115020751953e-05
chrX	6295091	T	A	1.6927719116210938e-05
chrX	6295091	T	C	8.404254913330078e-06
chrX	6295091	T	G	2.9861927032470703e-05
chrX	6295092	G	A	6.735324859619141e-06
chrX	6295092	G	C	-3.123283386230469e-05
chrX	6295092	G	T	1.233816146850586e-05
chrX	6295093	A	C	1.7464160919189453e-05
chrX	6295093	A	G	3.695487976074219e-05
chrX	6295093	A	T	7.212162017822266e-06
chrX	6295094	C	A	2.8967857360839844e-05
chrX	6295094	C	G	6.979703903198242e-05
chrX	6295094	C	T	3.230571746826172e-05
chrX	6295095	G	A	3.2782554626464844e-05
chrX	6295095	G	C	2.872943878173828e-05
chrX	6295095	G	T	2.491474151611328e-05
chrX	6295096	T	A	4.291534423828125e-06
chrX	6295096	T	C	1.1980533599853516e-05
chrX	6295096	T	G	3.8683414459228516e-05
chrX	6295097	T	A	1.9371509552001953e-05
chrX	6295097	T	C	4.708766937255859e-06
chrX	6295097	T	G	2.2232532501220703e-05
chrX	6295098	T	A	1.722574234008789e-05
chrX	6295098	T	C	4.708766937255859e-06
chrX	6295098	T	G	4.309415817260742e-05
chrX	6295099	A	C	1.3768672943115234e-05
chrX	6295099	A	G	3.11732292175293e-05
chrX	6295099	A	T	3.0219554901123047e-05
chrX	6295100	G	A	2.8967857360839844e-05
chrX	6295100	G	C	7.450580596923828e-06
chrX	6295100	G	T	2.3066997528076172e-05
chrX	6295101	T	A	6.496906280517578e-06
chrX	6295101	T	C	1.5914440155029297e-05
chrX	6295101	T	G	-7.569789886474609e-06
chrX	6295102	T	A	-3.7550926208496094e-06
chrX	6295102	T	C	-3.2782554626464844e-06
chrX	6295102	T	G	-1.0192394256591797e-05
chrX	6295103	T	A	-3.415346145629883e-05
chrX	6295103	T	C	6.735324859619141e-06
chrX	6295103	T	G	-2.014636993408203e-05
chrX	6295104	T	A	-6.0498714447021484e-05
chrX	6295104	T	C	-3.522634506225586e-05
chrX	6295104	T	G	-2.4616718292236328e-05
chrX	6295105	T	A	-9.119510650634766e-06
chrX	6295105	T	C	-5.424022674560547e-06
chrX	6295105	T	G	-2.855062484741211e-05
chrX	6295106	C	A	1.424551010131836e-05
chrX	6295106	C	G	1.4066696166992188e-05
chrX	6295106	C	T	4.2498111724853516e-05
chrX	6295107	G	A	4.011392593383789e-05
chrX	6295107	G	C	5.638599395751953e-05
chrX	6295107	G	T	7.849931716918945e-05
chrX	6295108	G	A	4.559755325317383e-05
chrX	6295108	G	C	1.055002212524414e-05
chrX	6295108	G	T	3.236532211303711e-05
chrX	6295109	G	A	3.844499588012695e-05
chrX	6295109	G	C	4.5239925384521484e-05
chrX	6295109	G	T	6.395578384399414e-05
chrX	6295110	G	A	6.085634231567383e-05
chrX	6295110	G	C	3.546476364135742e-05
chrX	6295110	G	T	7.158517837524414e-05
chrX	6295111	A	C	-1.8835067749023438e-05
chrX	6295111	A	G	-2.288818359375e-05
chrX	6295111	A	T	1.7702579498291016e-05
chrX	6295112	C	A	-3.516674041748047e-06
chrX	6295112	C	G	1.2695789337158203e-05
chrX	6295112	C	T	2.7477741241455078e-05
chrX	6295113	T	A	-4.690885543823242e-05
chrX	6295113	T	C	-2.9146671295166016e-05
chrX	6295113	T	G	-3.30805778503418e-05
chrX	6295114	T	A	-2.2351741790771484e-05
chrX	6295114	T	C	3.713369369506836e-05
chrX	6295114	T	G	-2.276897430419922e-05
chrX	6295115	T	A	-3.8564205169677734e-05
chrX	6295115	T	C	4.5359134674072266e-05
chrX	6295115	T	G	-6.455183029174805e-05
chrX	6295116	T	A	-7.450580596923828e-06
chrX	6295116	T	C	-2.6047229766845703e-05
chrX	6295116	T	G	-1.0132789611816406e-05
chrX	6295117	G	A	2.008676528930664e-05
chrX	6295117	G	C	7.152557373046875e-07
chrX	6295117	G	T	4.935264587402344e-05
chrX	6295118	A	C	-2.6345252990722656e-05
chrX	6295118	A	G	-3.0994415283203125e-05
chrX	6295118	A	T	2.664327621459961e-05
chrX	6295119	A	C	-2.8908252716064453e-05
chrX	6295119	A	G	-3.844499588012695e-05
chrX	6295119	A	T	-5.364418029785156e-07
chrX	6295120	G	A	2.3305416107177734e-05
chrX	6295120	G	C	-1.7285346984863281e-06
chrX	6295120	G	T	3.5703182220458984e-05
chrX	6295121	A	C	2.962350845336914e-05
chrX	6295121	A	G	-7.748603820800781e-07
chrX	6295121	A	T	3.0934810638427734e-05
chrX	6295122	A	C	4.273653030395508e-05
chrX	6295122	A	G	-2.1517276763916016e-05
chrX	6295122	A	T	2.294778823852539e-05
chrX	6295123	T	A	-4.1425228118896484e-05
chrX	6295123	T	C	6.556510925292969e-07
chrX	6295123	T	G	-1.7762184143066406e-05
chrX	6295124	A	C	1.9848346710205078e-05
chrX	6295124	A	G	-5.8650970458984375e-05
chrX	6295124	A	T	2.0444393157958984e-05
chrX	6295125	A	C	4.4405460357666016e-05
chrX	6295125	A	G	4.112720489501953e-06
chrX	6295125	A	T	3.11732292175293e-05
chrX	6295126	T	A	-1.2218952178955078e-05
chrX	6295126	T	C	-3.892183303833008e-05
chrX	6295126	T	G	-3.814697265625e-05
chrX	6295127	A	C	2.6166439056396484e-05
chrX	6295127	A	G	-4.082918167114258e-05
chrX	6295127	A	T	2.7954578399658203e-05
chrX	6295128	A	C	5.042552947998047e-05
chrX	6295128	A	G	4.649162292480469e-06
chrX	6295128	A	T	2.1338462829589844e-05
chrX	6295129	T	A	2.193450927734375e-05
chrX	6295129	T	C	1.1622905731201172e-05
chrX	6295129	T	G	-3.439188003540039e-05
chrX	6295130	A	C	1.704692840576172e-05
chrX	6295130	A	G	-6.9141387939453125e-06
chrX	6295130	A	T	1.6629695892333984e-05
chrX	6295131	A	C	5.304813385009766e-06
chrX	6295131	A	G	-7.62939453125e-06
chrX	6295131	A	T	-2.980232238769531e-07
chrX	6295132	A	C	-2.9265880584716797e-05
chrX	6295132	A	G	-2.282857894897461e-05
chrX	6295132	A	T	-4.45246696472168e-05
chrX	6295133	A	C	-5.7637691497802734e-05
chrX	6295133	A	G	-3.260374069213867e-05
chrX	6295133	A	T	-4.5299530029296875e-05
chrX	6295134	A	C	-3.8564205169677734e-05
chrX	6295134	A	G	-1.138448715209961e-05
chrX	6295134	A	T	-1.6748905181884766e-05
chrX	6295135	A	C	4.285573959350586e-05
chrX	6295135	A	G	6.020069122314453e-06
chrX	6295135	A	T	1.7940998077392578e-05
chrX	6295136	T	A	8.821487426757812e-06
chrX	6295136	T	C	5.048513412475586e-05
chrX	6295136	T	G	9.59634780883789e-06
chrX	6295137	T	A	-3.039836883544922e-06
chrX	6295137	T	C	-3.9696693420410156e-05
chrX	6295137	T	G	9.59634780883789e-06
chrX	6295138	G	A	2.0325183868408203e-05
chrX	6295138	G	C	3.8564205169677734e-05
chrX	6295138	G	T	6.324052810668945e-05
chrX	6295139	A	C	5.424022674560547e-06
chrX	6295139	A	G	-8.165836334228516e-06
chrX	6295139	A	T	2.0503997802734375e-05
chrX	6295140	C	A	3.337860107421875e-05
chrX	6295140	C	G	2.187490463256836e-05
chrX	6295140	C	T	1.8656253814697266e-05
chrX	6295141	C	A	-2.008676528930664e-05
chrX	6295141	C	G	6.973743438720703e-06
chrX	6295141	C	T	1.3709068298339844e-05
chrX	6295142	C	A	-1.1980533599853516e-05
chrX	6295142	C	G	1.0728836059570312e-06
chrX	6295142	C	T	1.996755599975586e-05
chrX	6295143	G	A	4.285573959350586e-05
chrX	6295143	G	C	3.743171691894531e-05
chrX	6295143	G	T	4.416704177856445e-05
chrX	6295144	T	A	3.6954879760742188e-06
chrX	6295144	T	C	8.940696716308594e-06
chrX	6295144	T	G	7.092952728271484e-06
chrX	6295145	G	A	2.0205974578857422e-05
chrX	6295145	G	C	1.823902130126953e-05
chrX	6295145	G	T	9.59634780883789e-06
chrX	6295146	A	C	-6.973743438720703e-06
chrX	6295146	A	G	-7.68899917602539e-06
chrX	6295146	A	T	-1.0907649993896484e-05
chrX	6295147	G	A	3.415346145629883e-05
chrX	6295147	G	C	1.8775463104248047e-05
chrX	6295147	G	T	5.424022674560547e-06
chrX	6295148	T	A	1.4543533325195312e-05
chrX	6295148	T	C	2.086162567138672e-06
chrX	6295148	T	G	-6.258487701416016e-06
chrX	6295149	C	A	3.8683414459228516e-05
chrX	6295149	C	G	4.2498111724853516e-05
chrX	6295149	C	T	2.7358531951904297e-05
chrX	6295150	C	A	1.4841556549072266e-05
chrX	6295150	C	G	8.463859558105469e-06
chrX	6295150	C	T	1.627206802368164e-05
chrX	6295151	T	A	3.319978713989258e-05
chrX	6295151	T	C	1.1980533599853516e-05
chrX	6295151	T	G	2.580881118774414e-05
chrX	6295152	C	A	4.8100948333740234e-05
chrX	6295152	C	G	1.4007091522216797e-05
chrX	6295152	C	T	2.5272369384765625e-05
chrX	6295153	C	A	-3.11732292175293e-05
chrX	6295153	C	G	-1.5556812286376953e-05
chrX	6295153	C	T	-1.8715858459472656e-05
chrX	6295154	T	A	-1.7881393432617188e-07
chrX	6295154	T	C	4.112720489501953e-06
chrX	6295154	T	G	-1.806020736694336e-05
chrX	6295155	T	A	2.1159648895263672e-05
chrX	6295155	T	C	1.996755599975586e-05
chrX	6295155	T	G	-3.039836883544922e-06
chrX	6295156	C	A	3.314018249511719e-05
chrX	6295156	C	G	2.0205974578857422e-05
chrX	6295156	C	T	-5.424022674560547e-06
chrX	6295157	A	C	6.735324859619141e-06
chrX	6295157	A	G	-3.6656856536865234e-05
chrX	6295157	A	T	-4.589557647705078e-06
chrX	6295158	A	C	-8.165836334228516e-06
chrX	6295158	A	G	-3.0934810638427734e-05
chrX	6295158	A	T	-3.236532211303711e-05
chrX	6295159	T	A	3.451108932495117e-05
chrX	6295159	T	C	5.662441253662109e-06
chrX	6295159	T	G	-3.3974647521972656e-06
chrX	6295160	T	A	-1.1086463928222656e-05
chrX	6295160	T	C	-4.947185516357422e-06
[truncated: 14,383 more rows]
