# Supplementary material for: Modeling transcriptional regulation of model species with deep learning
Source: HighWire-hosted journal article supplement (doi:10.1101/gr.266171.120), 2021-04-22
Supplement: Supplemental_Table_S11.xlsx [file Supplemental_Table_S11.xlsx]

## Sheet: Sheet1
Supplemental Table S11: Results from conducting in silico saturated mutagenesis for SDC-3 binding (accession no. SRX2228883) at the second high-confidence DCC binding site (ce11:ChrX:14523896-14527990) on the C. elegans X Chromosome.
# Reference prediction:	0.997661
Chromosome	Position	Reference Allele	Alternative Allele	DeepArk Prediction (accession no. SRX2228883)
chrX	14523895	C	A	0
chrX	14523895	C	G	0
chrX	14523895	C	T	0
chrX	14523896	G	A	0
chrX	14523896	G	C	0
chrX	14523896	G	T	0
chrX	14523897	C	A	0
chrX	14523897	C	G	0
chrX	14523897	C	T	0
chrX	14523898	A	C	0
chrX	14523898	A	G	0
chrX	14523898	A	T	0
chrX	14523899	A	C	0
chrX	14523899	A	G	0
chrX	14523899	A	T	0
chrX	14523900	A	C	0
chrX	14523900	A	G	0
chrX	14523900	A	T	0
chrX	14523901	G	A	0
chrX	14523901	G	C	0
chrX	14523901	G	T	0
chrX	14523902	A	C	0
chrX	14523902	A	G	0
chrX	14523902	A	T	0
chrX	14523903	A	C	0
chrX	14523903	A	G	0
chrX	14523903	A	T	0
chrX	14523904	A	C	0
chrX	14523904	A	G	0
chrX	14523904	A	T	0
chrX	14523905	C	A	0
chrX	14523905	C	G	0
chrX	14523905	C	T	0
chrX	14523906	A	C	0
chrX	14523906	A	G	0
chrX	14523906	A	T	0
chrX	14523907	A	C	0
chrX	14523907	A	G	0
chrX	14523907	A	T	0
chrX	14523908	G	A	0
chrX	14523908	G	C	0
chrX	14523908	G	T	0
chrX	14523909	A	C	0
chrX	14523909	A	G	0
chrX	14523909	A	T	0
chrX	14523910	A	C	0
chrX	14523910	A	G	0
chrX	14523910	A	T	0
chrX	14523911	T	A	0
chrX	14523911	T	C	0
chrX	14523911	T	G	0
chrX	14523912	T	A	0
chrX	14523912	T	C	0
chrX	14523912	T	G	0
chrX	14523913	C	A	5.96046e-08
chrX	14523913	C	G	5.96046e-08
chrX	14523913	C	T	5.96046e-08
chrX	14523914	A	C	0
chrX	14523914	A	G	0
chrX	14523914	A	T	0
chrX	14523915	A	C	0
chrX	14523915	A	G	0
chrX	14523915	A	T	0
chrX	14523916	G	A	0
chrX	14523916	G	C	0
chrX	14523916	G	T	5.96046e-08
chrX	14523917	A	C	0
chrX	14523917	A	G	0
chrX	14523917	A	T	5.96046e-08
chrX	14523918	T	A	5.96046e-08
chrX	14523918	T	C	0
chrX	14523918	T	G	0
chrX	14523919	G	A	5.96046e-08
chrX	14523919	G	C	5.96046e-08
chrX	14523919	G	T	5.96046e-08
chrX	14523920	A	C	0
chrX	14523920	A	G	0
chrX	14523920	A	T	0
chrX	14523921	C	A	0
chrX	14523921	C	G	0
chrX	14523921	C	T	5.96046e-08
chrX	14523922	A	C	5.96046e-08
chrX	14523922	A	G	5.96046e-08
chrX	14523922	A	T	5.96046e-08
chrX	14523923	G	A	0
chrX	14523923	G	C	5.96046e-08
chrX	14523923	G	T	5.96046e-08
chrX	14523924	G	A	-5.96046e-08
chrX	14523924	G	C	-5.96046e-08
chrX	14523924	G	T	-5.96046e-08
chrX	14523925	A	C	0
chrX	14523925	A	G	0
chrX	14523925	A	T	0
chrX	14523926	T	A	0
chrX	14523926	T	C	-5.96046e-08
chrX	14523926	T	G	5.96046e-08
chrX	14523927	G	A	5.96046e-08
chrX	14523927	G	C	5.96046e-08
chrX	14523927	G	T	0
chrX	14523928	C	A	1.19209e-07
chrX	14523928	C	G	5.96046e-08
chrX	14523928	C	T	5.96046e-08
chrX	14523929	A	C	1.19209e-07
chrX	14523929	A	G	5.96046e-08
chrX	14523929	A	T	0
chrX	14523930	A	C	5.96046e-08
chrX	14523930	A	G	5.96046e-08
chrX	14523930	A	T	5.96046e-08
chrX	14523931	C	A	-5.96046e-08
chrX	14523931	C	G	-5.96046e-08
chrX	14523931	C	T	0
chrX	14523932	C	A	5.96046e-08
chrX	14523932	C	G	5.96046e-08
chrX	14523932	C	T	0
chrX	14523933	G	A	5.96046e-08
chrX	14523933	G	C	0
chrX	14523933	G	T	5.96046e-08
chrX	14523934	T	A	0
chrX	14523934	T	C	0
chrX	14523934	T	G	5.96046e-08
chrX	14523935	C	A	5.96046e-08
chrX	14523935	C	G	0
chrX	14523935	C	T	5.96046e-08
chrX	14523936	G	A	5.96046e-08
chrX	14523936	G	C	-5.96046e-08
chrX	14523936	G	T	5.96046e-08
chrX	14523937	T	A	5.96046e-08
chrX	14523937	T	C	0
chrX	14523937	T	G	5.96046e-08
chrX	14523938	T	A	0
chrX	14523938	T	C	5.96046e-08
chrX	14523938	T	G	0
chrX	14523939	A	C	5.96046e-08
chrX	14523939	A	G	5.96046e-08
chrX	14523939	A	T	1.19209e-07
chrX	14523940	C	A	1.19209e-07
chrX	14523940	C	G	1.78814e-07
chrX	14523940	C	T	1.78814e-07
chrX	14523941	C	A	1.19209e-07
chrX	14523941	C	G	5.96046e-08
chrX	14523941	C	T	1.19209e-07
chrX	14523942	T	A	5.96046e-08
chrX	14523942	T	C	0
chrX	14523942	T	G	0
chrX	14523943	C	A	1.19209e-07
chrX	14523943	C	G	1.78814e-07
chrX	14523943	C	T	1.19209e-07
chrX	14523944	A	C	-5.96046e-08
chrX	14523944	A	G	5.96046e-08
chrX	14523944	A	T	0
chrX	14523945	A	C	-5.96046e-08
chrX	14523945	A	G	0
chrX	14523945	A	T	5.96046e-08
chrX	14523946	T	A	0
chrX	14523946	T	C	-5.96046e-08
chrX	14523946	T	G	0
chrX	14523947	C	A	5.96046e-08
chrX	14523947	C	G	0
chrX	14523947	C	T	0
chrX	14523948	T	A	5.96046e-08
chrX	14523948	T	C	0
chrX	14523948	T	G	0
chrX	14523949	T	A	0
chrX	14523949	T	C	-5.96046e-08
chrX	14523949	T	G	5.96046e-08
chrX	14523950	G	A	5.96046e-08
chrX	14523950	G	C	0
chrX	14523950	G	T	0
chrX	14523951	A	C	-5.96046e-08
chrX	14523951	A	G	-5.96046e-08
chrX	14523951	A	T	-5.96046e-08
chrX	14523952	T	A	0
chrX	14523952	T	C	-1.19209e-07
chrX	14523952	T	G	0
chrX	14523953	T	A	5.96046e-08
chrX	14523953	T	C	-5.96046e-08
chrX	14523953	T	G	0
chrX	14523954	A	C	0
chrX	14523954	A	G	-1.19209e-07
chrX	14523954	A	T	0
chrX	14523955	A	C	-1.19209e-07
chrX	14523955	A	G	-5.96046e-08
chrX	14523955	A	T	0
chrX	14523956	T	A	1.78814e-07
chrX	14523956	T	C	0
chrX	14523956	T	G	5.96046e-08
chrX	14523957	A	C	5.96046e-08
chrX	14523957	A	G	5.96046e-08
chrX	14523957	A	T	0
chrX	14523958	C	A	1.78814e-07
chrX	14523958	C	G	1.19209e-07
chrX	14523958	C	T	1.78814e-07
chrX	14523959	T	A	5.96046e-08
chrX	14523959	T	C	5.96046e-08
chrX	14523959	T	G	1.19209e-07
chrX	14523960	C	A	1.19209e-07
chrX	14523960	C	G	0
chrX	14523960	C	T	1.78814e-07
chrX	14523961	T	A	1.78814e-07
chrX	14523961	T	C	1.19209e-07
chrX	14523961	T	G	2.38419e-07
chrX	14523962	A	C	1.19209e-07
chrX	14523962	A	G	1.19209e-07
chrX	14523962	A	T	1.78814e-07
chrX	14523963	A	C	5.96046e-08
chrX	14523963	A	G	1.19209e-07
chrX	14523963	A	T	1.19209e-07
chrX	14523964	A	C	5.96046e-08
chrX	14523964	A	G	0
chrX	14523964	A	T	0
chrX	14523965	T	A	5.96046e-08
chrX	14523965	T	C	1.19209e-07
chrX	14523965	T	G	1.19209e-07
chrX	14523966	T	A	1.19209e-07
chrX	14523966	T	C	1.78814e-07
chrX	14523966	T	G	1.19209e-07
chrX	14523967	G	A	0
chrX	14523967	G	C	1.19209e-07
chrX	14523967	G	T	0
chrX	14523968	T	A	5.96046e-08
chrX	14523968	T	C	1.19209e-07
chrX	14523968	T	G	5.96046e-08
chrX	14523969	C	A	-5.96046e-08
chrX	14523969	C	G	0
chrX	14523969	C	T	5.96046e-08
chrX	14523970	A	C	1.19209e-07
chrX	14523970	A	G	2.38419e-07
chrX	14523970	A	T	5.96046e-08
chrX	14523971	A	C	1.19209e-07
chrX	14523971	A	G	0
chrX	14523971	A	T	0
chrX	14523972	T	A	5.96046e-08
chrX	14523972	T	C	1.19209e-07
chrX	14523972	T	G	5.96046e-08
chrX	14523973	T	A	1.19209e-07
chrX	14523973	T	C	2.38419e-07
chrX	14523973	T	G	1.19209e-07
chrX	14523974	C	A	1.19209e-07
chrX	14523974	C	G	1.19209e-07
chrX	14523974	C	T	1.78814e-07
chrX	14523975	A	C	1.19209e-07
chrX	14523975	A	G	1.78814e-07
chrX	14523975	A	T	-5.96046e-08
chrX	14523976	A	C	0
chrX	14523976	A	G	1.19209e-07
chrX	14523976	A	T	0
chrX	14523977	A	C	5.96046e-08
chrX	14523977	A	G	0
chrX	14523977	A	T	1.19209e-07
chrX	14523978	T	A	0
chrX	14523978	T	C	1.19209e-07
chrX	14523978	T	G	5.96046e-08
chrX	14523979	A	C	1.78814e-07
chrX	14523979	A	G	2.98023e-07
chrX	14523979	A	T	5.96046e-08
chrX	14523980	A	C	1.19209e-07
chrX	14523980	A	G	1.78814e-07
chrX	14523980	A	T	5.96046e-08
chrX	14523981	A	C	1.19209e-07
chrX	14523981	A	G	2.38419e-07
chrX	14523981	A	T	0
chrX	14523982	C	A	0
chrX	14523982	C	G	1.19209e-07
chrX	14523982	C	T	0
chrX	14523983	A	C	1.19209e-07
chrX	14523983	A	G	1.19209e-07
chrX	14523983	A	T	-5.96046e-08
chrX	14523984	A	C	1.19209e-07
chrX	14523984	A	G	1.78814e-07
chrX	14523984	A	T	0
chrX	14523985	T	A	0
chrX	14523985	T	C	5.96046e-08
chrX	14523985	T	G	5.96046e-08
chrX	14523986	T	A	-5.96046e-08
chrX	14523986	T	C	1.78814e-07
chrX	14523986	T	G	1.19209e-07
chrX	14523987	C	A	-1.78814e-07
chrX	14523987	C	G	5.96046e-08
chrX	14523987	C	T	-1.78814e-07
chrX	14523988	A	C	1.78814e-07
chrX	14523988	A	G	1.78814e-07
chrX	14523988	A	T	-2.38419e-07
chrX	14523989	A	C	-1.78814e-07
chrX	14523989	A	G	1.19209e-07
chrX	14523989	A	T	-1.19209e-07
chrX	14523990	A	C	5.96046e-08
chrX	14523990	A	G	0
chrX	14523990	A	T	-1.19209e-07
chrX	14523991	T	A	-1.19209e-07
chrX	14523991	T	C	0
chrX	14523991	T	G	-1.19209e-07
chrX	14523992	T	A	-1.19209e-07
chrX	14523992	T	C	1.19209e-07
chrX	14523992	T	G	-5.96046e-08
chrX	14523993	C	A	0
chrX	14523993	C	G	0
chrX	14523993	C	T	-5.96046e-08
chrX	14523994	A	C	2.98023e-07
chrX	14523994	A	G	4.76837e-07
chrX	14523994	A	T	-1.19209e-07
chrX	14523995	A	C	-1.19209e-07
chrX	14523995	A	G	1.19209e-07
chrX	14523995	A	T	-1.19209e-07
chrX	14523996	A	C	5.96046e-08
chrX	14523996	A	G	2.38419e-07
chrX	14523996	A	T	-1.78814e-07
chrX	14523997	G	A	-5.36442e-07
chrX	14523997	G	C	-2.38419e-07
chrX	14523997	G	T	-2.38419e-07
chrX	14523998	C	A	0
chrX	14523998	C	G	-2.38419e-07
chrX	14523998	C	T	-4.17233e-07
chrX	14523999	T	A	0
chrX	14523999	T	C	-1.19209e-07
chrX	14523999	T	G	0
chrX	14524000	T	A	0
chrX	14524000	T	C	1.19209e-07
chrX	14524000	T	G	1.19209e-07
chrX	14524001	T	A	0
chrX	14524001	T	C	5.96046e-08
chrX	14524001	T	G	-1.19209e-07
chrX	14524002	T	A	-2.38419e-07
chrX	14524002	T	C	3.57628e-07
chrX	14524002	T	G	0
chrX	14524003	G	A	-5.96046e-08
chrX	14524003	G	C	5.96046e-08
chrX	14524003	G	T	-2.38419e-07
chrX	14524004	T	A	1.78814e-07
chrX	14524004	T	C	2.98023e-07
chrX	14524004	T	G	1.19209e-07
chrX	14524005	T	A	1.78814e-07
chrX	14524005	T	C	3.57628e-07
chrX	14524005	T	G	2.38419e-07
chrX	14524006	T	A	0
chrX	14524006	T	C	4.17233e-07
chrX	14524006	T	G	1.78814e-07
chrX	14524007	T	A	0
chrX	14524007	T	C	1.78814e-07
chrX	14524007	T	G	5.96046e-08
chrX	14524008	G	A	-2.98023e-07
chrX	14524008	G	C	-4.76837e-07
chrX	14524008	G	T	-2.98023e-07
chrX	14524009	A	C	-1.19209e-07
chrX	14524009	A	G	4.76837e-07
chrX	14524009	A	T	-3.57628e-07
chrX	14524010	A	C	-3.57628e-07
chrX	14524010	A	G	-1.19209e-07
chrX	14524010	A	T	-4.17233e-07
chrX	14524011	T	A	5.96046e-08
chrX	14524011	T	C	0
chrX	14524011	T	G	4.76837e-07
chrX	14524012	T	A	5.96046e-08
chrX	14524012	T	C	2.38419e-07
chrX	14524012	T	G	-5.96046e-08
chrX	14524013	T	A	-1.19209e-07
chrX	14524013	T	C	5.96046e-08
chrX	14524013	T	G	1.19209e-07
chrX	14524014	C	A	0
chrX	14524014	C	G	5.96046e-08
chrX	14524014	C	T	-1.78814e-07
chrX	14524015	A	C	-5.96046e-07
chrX	14524015	A	G	1.19209e-07
chrX	14524015	A	T	-1.19209e-07
chrX	14524016	A	C	-4.17233e-07
chrX	14524016	A	G	2.38419e-07
chrX	14524016	A	T	-4.17233e-07
chrX	14524017	C	A	2.98023e-07
chrX	14524017	C	G	-1.19209e-07
chrX	14524017	C	T	0
chrX	14524018	T	A	2.98023e-07
chrX	14524018	T	C	0
chrX	14524018	T	G	4.17233e-07
chrX	14524019	A	C	-1.19209e-07
chrX	14524019	A	G	-2.98023e-07
chrX	14524019	A	T	-5.96046e-08
chrX	14524020	T	A	5.96046e-08
chrX	14524020	T	C	1.78814e-07
chrX	14524020	T	G	4.17233e-07
chrX	14524021	C	A	0
chrX	14524021	C	G	-1.19209e-07
chrX	14524021	C	T	-2.38419e-07
chrX	14524022	T	A	5.96046e-08
chrX	14524022	T	C	3.57628e-07
chrX	14524022	T	G	2.98023e-07
chrX	14524023	A	C	0
chrX	14524023	A	G	4.76837e-07
chrX	14524023	A	T	0
chrX	14524024	T	A	-2.38419e-07
chrX	14524024	T	C	4.76837e-07
chrX	14524024	T	G	5.36442e-07
chrX	14524025	A	C	-4.76837e-07
chrX	14524025	A	G	3.57628e-07
chrX	14524025	A	T	-1.19209e-07
chrX	14524026	A	C	1.78814e-07
chrX	14524026	A	G	2.38419e-07
chrX	14524026	A	T	-2.38419e-07
chrX	14524027	A	C	-4.76837e-07
chrX	14524027	A	G	-1.19209e-07
chrX	14524027	A	T	-1.19209e-07
chrX	14524028	T	A	-5.96046e-08
chrX	14524028	T	C	1.78814e-07
chrX	14524028	T	G	2.38419e-07
chrX	14524029	T	A	4.17233e-07
chrX	14524029	T	C	4.17233e-07
chrX	14524029	T	G	5.96046e-07
chrX	14524030	A	C	1.78814e-07
chrX	14524030	A	G	2.98023e-07
chrX	14524030	A	T	-7.7486e-07
chrX	14524031	T	A	2.98023e-07
chrX	14524031	T	C	9.53674e-07
chrX	14524031	T	G	1.19209e-06
chrX	14524032	C	A	2.38419e-07
chrX	14524032	C	G	6.55651e-07
chrX	14524032	C	T	-1.19209e-07
chrX	14524033	T	A	3.57628e-07
chrX	14524033	T	C	2.38419e-07
chrX	14524033	T	G	5.36442e-07
chrX	14524034	T	A	8.34465e-07
chrX	14524034	T	C	6.55651e-07
chrX	14524034	T	G	9.53674e-07
chrX	14524035	T	A	1.2517e-06
chrX	14524035	T	C	1.13249e-06
chrX	14524035	T	G	1.72853e-06
chrX	14524036	A	C	1.13249e-06
chrX	14524036	A	G	1.01328e-06
chrX	14524036	A	T	5.36442e-07
chrX	14524037	T	A	1.19209e-06
chrX	14524037	T	C	1.54972e-06
chrX	14524037	T	G	1.43051e-06
chrX	14524038	C	A	1.01328e-06
chrX	14524038	C	G	1.19209e-06
chrX	14524038	C	T	5.96046e-07
chrX	14524039	A	C	1.60933e-06
chrX	14524039	A	G	4.76837e-07
chrX	14524039	A	T	5.96046e-07
chrX	14524040	A	C	4.17233e-07
chrX	14524040	A	G	-5.96046e-08
chrX	14524040	A	T	1.19209e-07
chrX	14524041	T	A	1.2517e-06
chrX	14524041	T	C	1.43051e-06
chrX	14524041	T	G	2.20537e-06
chrX	14524042	T	A	7.15256e-07
chrX	14524042	T	C	1.01328e-06
chrX	14524042	T	G	1.13249e-06
chrX	14524043	T	A	8.9407e-07
chrX	14524043	T	C	8.34465e-07
chrX	14524043	T	G	1.07288e-06
chrX	14524044	C	A	1.01328e-06
chrX	14524044	C	G	8.9407e-07
chrX	14524044	C	T	1.78814e-07
chrX	14524045	T	A	5.96046e-08
chrX	14524045	T	C	0
chrX	14524045	T	G	1.01328e-06
chrX	14524046	G	A	4.76837e-07
chrX	14524046	G	C	-5.96046e-08
chrX	14524046	G	T	-6.55651e-07
chrX	14524047	C	A	-3.57628e-07
chrX	14524047	C	G	-5.96046e-08
chrX	14524047	C	T	-5.36442e-07
chrX	14524048	T	A	-1.78814e-07
chrX	14524048	T	C	-3.57628e-07
chrX	14524048	T	G	4.17233e-07
chrX	14524049	A	C	1.19209e-07
chrX	14524049	A	G	-2.38419e-07
chrX	14524049	A	T	-5.96046e-07
chrX	14524050	T	A	-1.19209e-07
chrX	14524050	T	C	0
chrX	14524050	T	G	5.36442e-07
chrX	14524051	G	A	-4.76837e-07
chrX	14524051	G	C	-4.76837e-07
chrX	14524051	G	T	-4.76837e-07
chrX	14524052	A	C	0
chrX	14524052	A	G	5.96046e-07
chrX	14524052	A	T	3.57628e-07
chrX	14524053	A	C	2.98023e-07
chrX	14524053	A	G	3.57628e-07
chrX	14524053	A	T	0
chrX	14524054	A	C	5.96046e-07
chrX	14524054	A	G	8.9407e-07
chrX	14524054	A	T	5.36442e-07
chrX	14524055	A	C	0
chrX	14524055	A	G	8.34465e-07
chrX	14524055	A	T	-5.96046e-08
chrX	14524056	C	A	5.36442e-07
chrX	14524056	C	G	1.2517e-06
chrX	14524056	C	T	2.98023e-07
chrX	14524057	T	A	9.53674e-07
chrX	14524057	T	C	-1.78814e-07
chrX	14524057	T	G	1.07288e-06
chrX	14524058	G	A	-1.19209e-07
chrX	14524058	G	C	5.96046e-08
chrX	14524058	G	T	-1.78814e-07
chrX	14524059	A	C	-5.36442e-07
chrX	14524059	A	G	1.19209e-06
chrX	14524059	A	T	5.36442e-07
chrX	14524060	A	C	-6.55651e-07
chrX	14524060	A	G	1.72853e-06
chrX	14524060	A	T	1.78814e-07
chrX	14524061	C	A	-8.34465e-07
chrX	14524061	C	G	1.13249e-06
chrX	14524061	C	T	-1.78814e-07
chrX	14524062	A	C	-3.57628e-07
chrX	14524062	A	G	5.96046e-08
chrX	14524062	A	T	-7.7486e-07
chrX	14524063	T	A	4.76837e-07
chrX	14524063	T	C	-1.3113e-06
chrX	14524063	T	G	1.07288e-06
chrX	14524064	T	A	0
chrX	14524064	T	C	7.7486e-07
chrX	14524064	T	G	9.53674e-07
chrX	14524065	C	A	8.34465e-07
chrX	14524065	C	G	8.9407e-07
chrX	14524065	C	T	8.34465e-07
chrX	14524066	C	A	3.57628e-07
chrX	14524066	C	G	5.36442e-07
chrX	14524066	C	T	5.96046e-07
chrX	14524067	A	C	-7.15256e-07
chrX	14524067	A	G	8.9407e-07
chrX	14524067	A	T	-3.57628e-07
chrX	14524068	A	C	0
chrX	14524068	A	G	2.98023e-07
chrX	14524068	A	T	-5.96046e-08
chrX	14524069	A	C	2.38419e-07
chrX	14524069	A	G	-2.38419e-07
chrX	14524069	A	T	4.17233e-07
chrX	14524070	G	A	-5.96046e-08
chrX	14524070	G	C	-2.38419e-07
chrX	14524070	G	T	-2.38419e-07
chrX	14524071	T	A	9.53674e-07
chrX	14524071	T	C	7.7486e-07
chrX	14524071	T	G	1.3113e-06
chrX	14524072	T	A	1.43051e-06
chrX	14524072	T	C	1.54972e-06
chrX	14524072	T	G	1.13249e-06
chrX	14524073	T	A	6.55651e-07
chrX	14524073	T	C	8.9407e-07
chrX	14524073	T	G	6.55651e-07
chrX	14524074	C	A	4.76837e-07
chrX	14524074	C	G	9.53674e-07
chrX	14524074	C	T	-1.2517e-06
chrX	14524075	C	A	1.43051e-06
chrX	14524075	C	G	2.02656e-06
chrX	14524075	C	T	5.96046e-07
chrX	14524076	A	C	-8.34465e-07
chrX	14524076	A	G	5.96046e-07
chrX	14524076	A	T	1.37091e-06
chrX	14524077	G	A	2.98023e-07
chrX	14524077	G	C	6.55651e-07
chrX	14524077	G	T	-7.15256e-07
chrX	14524078	C	A	-2.38419e-07
chrX	14524078	C	G	2.38419e-07
chrX	14524078	C	T	1.13249e-06
chrX	14524079	A	C	-5.96046e-07
chrX	14524079	A	G	4.76837e-07
chrX	14524079	A	T	-2.98023e-07
chrX	14524080	A	C	-1.01328e-06
chrX	14524080	A	G	-5.96046e-07
chrX	14524080	A	T	1.19209e-07
chrX	14524081	T	A	-1.78814e-07
chrX	14524081	T	C	-3.57628e-07
chrX	14524081	T	G	-5.96046e-08
chrX	14524082	T	A	-3.57628e-07
chrX	14524082	T	C	-1.49012e-06
chrX	14524082	T	G	-4.76837e-07
chrX	14524083	T	A	7.7486e-07
chrX	14524083	T	C	-1.07288e-06
chrX	14524083	T	G	-5.96046e-08
chrX	14524084	G	A	2.38419e-07
chrX	14524084	G	C	-1.13249e-06
chrX	14524084	G	T	2.38419e-07
chrX	14524085	T	A	-8.9407e-07
chrX	14524085	T	C	-4.17233e-07
chrX	14524085	T	G	-8.34465e-07
chrX	14524086	T	A	-8.9407e-07
chrX	14524086	T	C	-1.01328e-06
chrX	14524086	T	G	-6.55651e-07
chrX	14524087	T	A	4.17233e-07
chrX	14524087	T	C	4.17233e-07
chrX	14524087	T	G	1.78814e-07
chrX	14524088	C	A	-2.98023e-07
chrX	14524088	C	G	-1.07288e-06
chrX	14524088	C	T	6.55651e-07
chrX	14524089	A	C	3.57628e-07
chrX	14524089	A	G	-3.57628e-07
chrX	14524089	A	T	-4.17233e-07
chrX	14524090	A	C	0
chrX	14524090	A	G	1.78814e-07
chrX	14524090	A	T	-1.19209e-07
chrX	14524091	T	A	-1.78814e-07
chrX	14524091	T	C	1.19209e-07
chrX	14524091	T	G	1.13249e-06
chrX	14524092	C	A	6.55651e-07
chrX	14524092	C	G	-5.96046e-08
chrX	14524092	C	T	8.34465e-07
chrX	14524093	A	C	2.98023e-07
chrX	14524093	A	G	-1.43051e-06
chrX	14524093	A	T	1.90735e-06
chrX	14524094	A	C	5.96046e-07
chrX	14524094	A	G	-1.49012e-06
chrX	14524094	A	T	1.78814e-07
chrX	14524095	A	C	-1.2517e-06
chrX	14524095	A	G	0
chrX	14524095	A	T	-1.3113e-06
chrX	14524096	G	A	-2.98023e-07
chrX	14524096	G	C	-2.98023e-07
chrX	14524096	G	T	1.78814e-07
chrX	14524097	A	C	-2.98023e-07
chrX	14524097	A	G	1.19209e-07
chrX	14524097	A	T	4.17233e-07
chrX	14524098	A	C	-8.9407e-07
chrX	14524098	A	G	-2.08616e-06
chrX	14524098	A	T	3.57628e-07
chrX	14524099	A	C	-5.96046e-08
chrX	14524099	A	G	4.17233e-07
chrX	14524099	A	T	-5.36442e-07
chrX	14524100	C	A	-8.9407e-07
chrX	14524100	C	G	2.38419e-07
chrX	14524100	C	T	0
chrX	14524101	A	C	-5.36442e-07
chrX	14524101	A	G	-1.78814e-07
chrX	14524101	A	T	-1.13249e-06
chrX	14524102	A	C	-1.01328e-06
chrX	14524102	A	G	-5.36442e-07
chrX	14524102	A	T	-2.98023e-07
chrX	14524103	C	A	-1.07288e-06
chrX	14524103	C	G	-5.96046e-08
chrX	14524103	C	T	-5.36442e-07
chrX	14524104	A	C	-1.78814e-07
chrX	14524104	A	G	-3.57628e-07
chrX	14524104	A	T	-4.17233e-07
chrX	14524105	A	C	-1.01328e-06
chrX	14524105	A	G	-1.13249e-06
chrX	14524105	A	T	2.38419e-07
chrX	14524106	A	C	-2.98023e-07
chrX	14524106	A	G	-4.17233e-07
chrX	14524106	A	T	-1.19209e-07
chrX	14524107	A	C	-1.78814e-07
chrX	14524107	A	G	-1.13249e-06
chrX	14524107	A	T	-1.78814e-07
chrX	14524108	A	C	1.2517e-06
chrX	14524108	A	G	-4.17233e-07
chrX	14524108	A	T	4.76837e-07
chrX	14524109	T	A	-1.78814e-06
chrX	14524109	T	C	-7.15256e-07
chrX	14524109	T	G	-4.17233e-07
chrX	14524110	A	C	-5.36442e-07
chrX	14524110	A	G	-4.17233e-07
chrX	14524110	A	T	-1.3113e-06
chrX	14524111	C	A	-7.7486e-07
chrX	14524111	C	G	-7.15256e-07
chrX	14524111	C	T	-4.76837e-07
chrX	14524112	T	A	-1.78814e-07
chrX	14524112	T	C	2.98023e-07
chrX	14524112	T	G	-7.15256e-07
chrX	14524113	A	C	-4.76837e-07
chrX	14524113	A	G	-8.34465e-07
chrX	14524113	A	T	-1.07288e-06
chrX	14524114	T	A	-1.01328e-06
chrX	14524114	T	C	-1.72853e-06
chrX	14524114	T	G	-1.60933e-06
chrX	14524115	G	A	2.98023e-07
chrX	14524115	G	C	-7.15256e-07
chrX	14524115	G	T	-4.76837e-07
chrX	14524116	G	A	-1.3113e-06
chrX	14524116	G	C	-2.44379e-06
chrX	14524116	G	T	-2.563e-06
chrX	14524117	G	A	-5.96046e-07
chrX	14524117	G	C	-8.34465e-07
chrX	14524117	G	T	-6.55651e-07
chrX	14524118	A	C	-5.96046e-08
chrX	14524118	A	G	1.78814e-07
chrX	14524118	A	T	-5.96046e-08
chrX	14524119	A	C	7.7486e-07
chrX	14524119	A	G	7.7486e-07
chrX	14524119	A	T	5.36442e-07
chrX	14524120	A	C	1.2517e-06
chrX	14524120	A	G	5.36442e-07
chrX	14524120	A	T	3.57628e-07
chrX	14524121	A	C	1.72853e-06
chrX	14524121	A	G	-1.78814e-07
chrX	14524121	A	T	8.9407e-07
chrX	14524122	C	A	-8.34465e-07
chrX	14524122	C	G	1.19209e-06
chrX	14524122	C	T	1.19209e-07
chrX	14524123	G	A	-1.19209e-06
chrX	14524123	G	C	-2.80142e-06
chrX	14524123	G	T	-1.66893e-06
chrX	14524124	T	A	-1.19209e-07
chrX	14524124	T	C	-1.72853e-06
chrX	14524124	T	G	0
chrX	14524125	A	C	-2.98023e-06
chrX	14524125	A	G	-1.54972e-06
chrX	14524125	A	T	-1.49012e-06
chrX	14524126	A	C	-2.98023e-07
chrX	14524126	A	G	-1.84774e-06
chrX	14524126	A	T	4.76837e-07
chrX	14524127	G	A	-1.78814e-07
chrX	14524127	G	C	4.17233e-07
chrX	14524127	G	T	3.57628e-07
chrX	14524128	T	A	7.15256e-07
chrX	14524128	T	C	1.19209e-06
chrX	14524128	T	G	1.13249e-06
chrX	14524129	C	A	-8.9407e-07
chrX	14524129	C	G	-9.53674e-07
chrX	14524129	C	T	-1.19209e-06
chrX	14524130	A	C	1.72853e-06
chrX	14524130	A	G	1.19209e-07
chrX	14524130	A	T	1.84774e-06
chrX	14524131	G	A	9.53674e-07
chrX	14524131	G	C	-8.34465e-07
chrX	14524131	G	T	1.49012e-06
chrX	14524132	T	A	2.38419e-07
chrX	14524132	T	C	-8.9407e-07
chrX	14524132	T	G	-3.57628e-07
chrX	14524133	T	A	1.78814e-07
chrX	14524133	T	C	-5.96046e-07
chrX	14524133	T	G	-1.84774e-06
chrX	14524134	G	A	-2.6226e-06
chrX	14524134	G	C	-3.8147e-06
chrX	14524134	G	T	-1.54972e-06
chrX	14524135	A	C	1.19209e-07
chrX	14524135	A	G	-3.57628e-06
chrX	14524135	A	T	-2.14577e-06
chrX	14524136	G	A	-1.78814e-07
chrX	14524136	G	C	-1.54972e-06
chrX	14524136	G	T	-5.36442e-07
chrX	14524137	T	A	-2.38419e-07
chrX	14524137	T	C	-2.44379e-06
chrX	14524137	T	G	-1.07288e-06
chrX	14524138	G	A	-3.63588e-06
chrX	14524138	G	C	-2.98023e-07
chrX	14524138	G	T	-2.92063e-06
chrX	14524139	C	A	1.78814e-06
chrX	14524139	C	G	4.76837e-07
chrX	14524139	C	T	8.34465e-07
chrX	14524140	T	A	5.96046e-08
chrX	14524140	T	C	-1.19209e-06
chrX	14524140	T	G	1.60933e-06
chrX	14524141	G	A	-2.38419e-07
chrX	14524141	G	C	-1.78814e-07
chrX	14524141	G	T	-1.78814e-06
chrX	14524142	T	A	-1.19209e-07
chrX	14524142	T	C	1.72853e-06
chrX	14524142	T	G	1.78814e-07
chrX	14524143	G	A	-8.34465e-07
chrX	14524143	G	C	5.96046e-07
chrX	14524143	G	T	1.13249e-06
chrX	14524144	G	A	9.53674e-07
chrX	14524144	G	C	-1.78814e-06
chrX	14524144	G	T	4.17233e-07
chrX	14524145	A	C	-1.37091e-06
chrX	14524145	A	G	2.98023e-07
chrX	14524145	A	T	-2.02656e-06
chrX	14524146	C	A	-1.78814e-07
chrX	14524146	C	G	2.68221e-06
chrX	14524146	C	T	2.08616e-06
chrX	14524147	T	A	-1.19209e-06
chrX	14524147	T	C	3.27826e-06
chrX	14524147	T	G	-8.9407e-07
chrX	14524148	A	C	1.84774e-06
chrX	14524148	A	G	1.2517e-06
chrX	14524148	A	T	1.49012e-06
chrX	14524149	C	A	-5.36442e-07
chrX	14524149	C	G	1.13249e-06
chrX	14524149	C	T	2.38419e-07
chrX	14524150	T	A	-1.19209e-07
chrX	14524150	T	C	1.60933e-06
chrX	14524150	T	G	1.3113e-06
chrX	14524151	A	C	3.51667e-06
chrX	14524151	A	G	5.96046e-07
chrX	14524151	A	T	1.43051e-06
chrX	14524152	C	A	4.76837e-07
chrX	14524152	C	G	1.19209e-07
chrX	14524152	C	T	-4.17233e-07
chrX	14524153	C	A	1.72853e-06
chrX	14524153	C	G	1.2517e-06
chrX	14524153	C	T	1.01328e-06
chrX	14524154	G	A	-7.15256e-07
chrX	14524154	G	C	1.78814e-07
chrX	14524154	G	T	6.55651e-07
chrX	14524155	C	A	5.36442e-07
chrX	14524155	C	G	2.32458e-06
chrX	14524155	C	T	-5.96046e-07
chrX	14524156	T	A	5.96046e-07
chrX	14524156	T	C	1.78814e-06
chrX	14524156	T	G	-1.01328e-06
chrX	14524157	T	A	1.96695e-06
chrX	14524157	T	C	4.11272e-06
chrX	14524157	T	G	1.96695e-06
chrX	14524158	T	A	2.08616e-06
chrX	14524158	T	C	2.08616e-06
chrX	14524158	T	G	3.15905e-06
chrX	14524159	A	C	1.2517e-06
chrX	14524159	A	G	2.38419e-07
chrX	14524159	A	T	-5.96046e-08
chrX	14524160	G	A	7.15256e-07
chrX	14524160	G	C	1.37091e-06
chrX	14524160	G	T	-4.17233e-07
chrX	14524161	T	A	1.84774e-06
chrX	14524161	T	C	3.33786e-06
chrX	14524161	T	G	1.3113e-06
chrX	14524162	T	A	1.66893e-06
chrX	14524162	T	C	1.2517e-06
chrX	14524162	T	G	6.25849e-06
chrX	14524163	T	A	3.51667e-06
chrX	14524163	T	C	6.85453e-06
chrX	14524163	T	G	6.97374e-06
chrX	14524164	T	A	3.15905e-06
chrX	14524164	T	C	3.99351e-06
chrX	14524164	T	G	2.80142e-06
chrX	14524165	T	A	1.96695e-06
chrX	14524165	T	C	3.03984e-06
chrX	14524165	T	G	4.35114e-06
chrX	14524166	C	A	1.66893e-06
chrX	14524166	C	G	2.563e-06
chrX	14524166	C	T	-1.19209e-07
chrX	14524167	T	A	1.43051e-06
chrX	14524167	T	C	1.49012e-06
chrX	14524167	T	G	4.76837e-07
chrX	14524168	G	A	9.53674e-07
chrX	14524168	G	C	2.80142e-06
chrX	14524168	G	T	3.8743e-06
chrX	14524169	C	A	-1.07288e-06
chrX	14524169	C	G	1.60933e-06
chrX	14524169	C	T	-1.78814e-07
chrX	14524170	C	A	4.47035e-06
chrX	14524170	C	G	3.57628e-07
chrX	14524170	C	T	2.44379e-06
chrX	14524171	A	C	-5.36442e-07
chrX	14524171	A	G	-5.36442e-07
chrX	14524171	A	T	-1.78814e-07
chrX	14524172	G	A	-1.54972e-06
chrX	14524172	G	C	-1.13249e-06
chrX	14524172	G	T	1.19209e-07
chrX	14524173	A	C	-1.2517e-06
chrX	14524173	A	G	1.19209e-06
chrX	14524173	A	T	5.36442e-07
chrX	14524174	A	C	-4.17233e-07
chrX	14524174	A	G	1.66893e-06
chrX	14524174	A	T	-5.36442e-07
chrX	14524175	T	A	5.96046e-07
chrX	14524175	T	C	-1.66893e-06
chrX	14524175	T	G	1.19209e-07
chrX	14524176	T	A	1.01328e-06
chrX	14524176	T	C	-2.86102e-06
chrX	14524176	T	G	5.96046e-07
chrX	14524177	G	A	6.55651e-07
chrX	14524177	G	C	-5.96046e-07
chrX	14524177	G	T	3.63588e-06
chrX	14524178	G	A	2.68221e-06
chrX	14524178	G	C	-1.3113e-06
chrX	14524178	G	T	1.01328e-06
chrX	14524179	A	C	-8.9407e-07
chrX	14524179	A	G	6.55651e-07
chrX	14524179	A	T	5.36442e-07
chrX	14524180	G	A	1.60933e-06
chrX	14524180	G	C	-2.5034e-06
chrX	14524180	G	T	4.76837e-07
chrX	14524181	T	A	2.20537e-06
chrX	14524181	T	C	1.78814e-06
chrX	14524181	T	G	4.17233e-07
chrX	14524182	T	A	-4.17233e-07
chrX	14524182	T	C	-7.15256e-07
chrX	14524182	T	G	9.53674e-07
chrX	14524183	T	A	-1.01924e-05
chrX	14524183	T	C	2.26498e-06
chrX	14524183	T	G	1.43051e-06
chrX	14524184	T	A	-2.32458e-06
chrX	14524184	T	C	2.44379e-06
chrX	14524184	T	G	-8.34465e-07
chrX	14524185	C	A	0
chrX	14524185	C	G	0
chrX	14524185	C	T	1.78814e-07
chrX	14524186	A	C	4.47035e-06
chrX	14524186	A	G	-8.34465e-07
chrX	14524186	A	T	-2.6226e-06
chrX	14524187	A	C	7.15256e-07
chrX	14524187	A	G	-5.96046e-08
chrX	14524187	A	T	5.36442e-07
chrX	14524188	T	A	-1.19209e-06
chrX	14524188	T	C	1.84774e-06
chrX	14524188	T	G	1.37091e-06
chrX	14524189	T	A	1.37091e-06
chrX	14524189	T	C	3.15905e-06
chrX	14524189	T	G	2.86102e-06
chrX	14524190	T	A	9.53674e-07
chrX	14524190	T	C	-5.96046e-07
chrX	14524190	T	G	-1.07288e-06
chrX	14524191	T	A	-1.19209e-07
chrX	14524191	T	C	-8.9407e-07
chrX	14524191	T	G	4.17233e-07
chrX	14524192	G	A	-3.57628e-07
chrX	14524192	G	C	-4.11272e-06
chrX	14524192	G	T	-7.15256e-07
chrX	14524193	A	C	-6.25849e-06
chrX	14524193	A	G	-5.96046e-08
chrX	14524193	A	T	-2.68221e-06
chrX	14524194	G	A	-1.60933e-06
chrX	14524194	G	C	-2.563e-06
chrX	14524194	G	T	-1.49012e-06
chrX	14524195	T	A	-1.19209e-07
chrX	14524195	T	C	2.38419e-07
chrX	14524195	T	G	8.9407e-07
chrX	14524196	T	A	4.17233e-07
chrX	14524196	T	C	-1.43051e-06
chrX	14524196	T	G	-2.98023e-07
chrX	14524197	A	C	-5.96046e-08
chrX	14524197	A	G	1.43051e-06
chrX	14524197	A	T	1.37091e-06
chrX	14524198	T	A	-2.5034e-06
chrX	14524198	T	C	-2.6226e-06
chrX	14524198	T	G	-8.9407e-07
chrX	14524199	A	C	-2.5034e-06
chrX	14524199	A	G	-2.26498e-06
chrX	14524199	A	T	-1.19209e-06
chrX	14524200	A	C	4.76837e-07
chrX	14524200	A	G	4.17233e-07
chrX	14524200	A	T	3.57628e-07
chrX	14524201	T	A	-7.15256e-07
chrX	14524201	T	C	-2.14577e-06
chrX	14524201	T	G	-2.80142e-06
chrX	14524202	T	A	-3.57628e-07
chrX	14524202	T	C	-3.8743e-06
chrX	14524202	T	G	-2.02656e-06
chrX	14524203	A	C	1.84774e-06
chrX	14524203	A	G	2.38419e-06
chrX	14524203	A	T	2.20537e-06
chrX	14524204	C	A	-6.55651e-07
chrX	14524204	C	G	2.02656e-06
chrX	14524204	C	T	2.98023e-07
chrX	14524205	A	C	5.1856e-06
chrX	14524205	A	G	7.15256e-07
chrX	14524205	A	T	2.20537e-06
chrX	14524206	T	A	7.15256e-07
chrX	14524206	T	C	2.38419e-07
chrX	14524206	T	G	3.57628e-07
chrX	14524207	G	A	1.66893e-06
chrX	14524207	G	C	8.9407e-07
chrX	14524207	G	T	2.14577e-06
chrX	14524208	G	A	-1.78814e-07
chrX	14524208	G	C	2.92063e-06
chrX	14524208	G	T	1.19209e-06
chrX	14524209	C	A	1.96695e-06
chrX	14524209	C	G	1.3113e-06
chrX	14524209	C	T	1.43051e-06
chrX	14524210	G	A	2.20537e-06
chrX	14524210	G	C	-5.96046e-07
chrX	14524210	G	T	3.27826e-06
chrX	14524211	T	A	8.34465e-07
chrX	14524211	T	C	7.15256e-07
chrX	14524211	T	G	-2.98023e-07
chrX	14524212	T	A	1.19209e-07
chrX	14524212	T	C	2.08616e-06
chrX	14524212	T	G	-3.51667e-06
chrX	14524213	T	A	-4.11272e-06
chrX	14524213	T	C	1.37091e-06
chrX	14524213	T	G	-2.80142e-06
chrX	14524214	T	A	-2.20537e-06
chrX	14524214	T	C	2.80142e-06
chrX	14524214	T	G	-1.60933e-06
chrX	14524215	G	A	1.72853e-06
chrX	14524215	G	C	2.20537e-06
chrX	14524215	G	T	2.92063e-06
chrX	14524216	A	C	5.36442e-07
chrX	14524216	A	G	-2.26498e-06
chrX	14524216	A	T	2.563e-06
chrX	14524217	C	A	1.3113e-06
chrX	14524217	C	G	-3.57628e-07
chrX	14524217	C	T	2.92063e-06
chrX	14524218	G	A	2.08616e-06
chrX	14524218	G	C	3.03984e-06
chrX	14524218	G	T	4.94719e-06
chrX	14524219	C	A	4.70877e-06
chrX	14524219	C	G	2.44379e-06
chrX	14524219	C	T	3.27826e-06
chrX	14524220	C	A	-2.26498e-06
chrX	14524220	C	G	2.98023e-07
chrX	14524220	C	T	-2.98023e-07
chrX	14524221	T	A	2.38419e-07
chrX	14524221	T	C	1.49012e-06
chrX	14524221	T	G	6.55651e-07
chrX	14524222	A	C	3.63588e-06
chrX	14524222	A	G	2.32458e-06
chrX	14524222	A	T	1.84774e-06
chrX	14524223	G	A	5.36442e-07
chrX	14524223	G	C	1.72853e-06
chrX	14524223	G	T	2.32458e-06
chrX	14524224	A	C	3.27826e-06
chrX	14524224	A	G	1.90735e-06
chrX	14524224	A	T	2.86102e-06
chrX	14524225	A	C	1.60933e-06
chrX	14524225	A	G	1.84774e-06
chrX	14524225	A	T	1.84774e-06
chrX	14524226	A	C	3.21865e-06
chrX	14524226	A	G	1.37091e-06
chrX	14524226	A	T	1.54972e-06
chrX	14524227	A	C	2.68221e-06
chrX	14524227	A	G	2.68221e-06
chrX	14524227	A	T	2.6226e-06
chrX	14524228	A	C	2.80142e-06
chrX	14524228	A	G	2.14577e-06
chrX	14524228	A	T	1.72853e-06
chrX	14524229	A	C	2.08616e-06
chrX	14524229	A	G	1.54972e-06
chrX	14524229	A	T	-5.96046e-08
chrX	14524230	A	C	8.34465e-07
chrX	14524230	A	G	2.20537e-06
chrX	14524230	A	T	1.49012e-06
chrX	14524231	C	A	2.38419e-07
chrX	14524231	C	G	2.44379e-06
chrX	14524231	C	T	9.53674e-07
chrX	14524232	A	C	-1.78814e-07
chrX	14524232	A	G	5.96046e-07
chrX	14524232	A	T	3.57628e-07
chrX	14524233	G	A	5.96046e-08
chrX	14524233	G	C	1.84774e-06
chrX	14524233	G	T	0
chrX	14524234	T	A	1.49012e-06
chrX	14524234	T	C	6.25849e-06
chrX	14524234	T	G	1.72853e-06
chrX	14524235	T	A	6.55651e-07
chrX	14524235	T	C	5.1856e-06
chrX	14524235	T	G	4.94719e-06
chrX	14524236	T	A	8.9407e-07
chrX	14524236	T	C	6.97374e-06
chrX	14524236	T	G	3.45707e-06
chrX	14524237	T	A	3.15905e-06
chrX	14524237	T	C	5.78165e-06
chrX	14524237	T	G	5.42402e-06
chrX	14524238	T	A	3.69549e-06
chrX	14524238	T	C	-1.2517e-06
chrX	14524238	T	G	2.74181e-06
chrX	14524239	C	A	-1.66893e-06
chrX	14524239	C	G	3.57628e-07
chrX	14524239	C	T	8.9407e-07
chrX	14524240	C	A	2.38419e-07
chrX	14524240	C	G	1.66893e-06
chrX	14524240	C	T	4.17233e-07
chrX	14524241	C	A	4.23193e-06
chrX	14524241	C	G	2.5034e-06
chrX	14524241	C	T	2.563e-06
chrX	14524242	T	A	-2.98023e-07
chrX	14524242	T	C	-4.23193e-06
chrX	14524242	T	G	-2.5034e-06
chrX	14524243	C	A	-1.07288e-06
chrX	14524243	C	G	-1.78814e-06
chrX	14524243	C	T	1.3113e-06
chrX	14524244	G	A	5.96046e-07
chrX	14524244	G	C	-2.38419e-07
chrX	14524244	G	T	1.01328e-06
chrX	14524245	A	C	-5.06639e-06
chrX	14524245	A	G	-2.80142e-06
chrX	14524245	A	T	-1.66893e-06
chrX	14524246	G	A	2.38419e-07
chrX	14524246	G	C	1.3113e-06
chrX	14524246	G	T	3.57628e-07
chrX	14524247	A	C	2.98023e-07
chrX	14524247	A	G	-4.11272e-06
chrX	14524247	A	T	-1.01328e-06
chrX	14524248	G	A	-8.34465e-07
chrX	14524248	G	C	-2.32458e-06
chrX	14524248	G	T	1.01328e-06
chrX	14524249	A	C	2.98023e-07
chrX	14524249	A	G	-2.02656e-06
chrX	14524249	A	T	8.34465e-07
chrX	14524250	T	A	-2.26498e-06
chrX	14524250	T	C	-2.08616e-06
chrX	14524250	T	G	-1.54972e-06
chrX	14524251	A	C	1.72853e-06
chrX	14524251	A	G	2.38419e-06
chrX	14524251	A	T	-1.19209e-07
chrX	14524252	A	C	-3.09944e-06
chrX	14524252	A	G	1.19209e-06
chrX	14524252	A	T	1.01328e-06
chrX	14524253	C	A	2.02656e-06
chrX	14524253	C	G	2.44379e-06
chrX	14524253	C	T	3.75509e-06
chrX	14524254	C	A	-2.44379e-06
chrX	14524254	C	G	-5.96046e-08
chrX	14524254	C	T	1.07288e-06
chrX	14524255	C	A	5.36442e-07
chrX	14524255	C	G	1.13249e-06
chrX	14524255	C	T	1.84774e-06
chrX	14524256	T	A	1.96695e-06
chrX	14524256	T	C	-1.01328e-06
chrX	14524256	T	G	4.17233e-07
chrX	14524257	T	A	-6.55651e-07
chrX	14524257	T	C	1.49012e-06
chrX	14524257	T	G	-8.34465e-07
chrX	14524258	T	A	-6.61612e-06
chrX	14524258	T	C	7.7486e-07
chrX	14524258	T	G	-3.03984e-06
chrX	14524259	G	A	3.15905e-06
chrX	14524259	G	C	2.80142e-06
chrX	14524259	G	T	1.84774e-06
chrX	14524260	A	C	2.32458e-06
chrX	14524260	A	G	-1.60933e-06
chrX	14524260	A	T	-8.34465e-07
chrX	14524261	G	A	-4.17233e-07
chrX	14524261	G	C	-2.44379e-06
chrX	14524261	G	T	-2.68221e-06
chrX	14524262	A	C	-1.13249e-06
chrX	14524262	A	G	-1.78814e-07
chrX	14524262	A	T	-2.92063e-06
chrX	14524263	T	A	8.9407e-07
chrX	14524263	T	C	-4.35114e-06
chrX	14524263	T	G	-1.2517e-06
chrX	14524264	T	A	0
chrX	14524264	T	C	-4.17233e-07
chrX	14524264	T	G	-7.15256e-07
chrX	14524265	A	C	5.78165e-06
chrX	14524265	A	G	1.66893e-06
chrX	14524265	A	T	1.60933e-06
chrX	14524266	C	A	4.17233e-07
chrX	14524266	C	G	-5.96046e-07
chrX	14524266	C	T	5.96046e-08
chrX	14524267	T	A	-2.74181e-06
chrX	14524267	T	C	2.92063e-06
chrX	14524267	T	G	4.17233e-07
chrX	14524268	G	A	1.3113e-06
chrX	14524268	G	C	2.80142e-06
chrX	14524268	G	T	3.39746e-06
chrX	14524269	A	C	5.06639e-06
chrX	14524269	A	G	2.32458e-06
chrX	14524269	A	T	1.2517e-06
chrX	14524270	C	A	4.11272e-06
chrX	14524270	C	G	6.55651e-07
chrX	14524270	C	T	-4.17233e-07
chrX	14524271	A	C	2.68221e-06
chrX	14524271	A	G	2.68221e-06
chrX	14524271	A	T	4.35114e-06
chrX	14524272	A	C	2.98023e-07
chrX	14524272	A	G	-1.49012e-06
chrX	14524272	A	T	1.13249e-06
chrX	14524273	A	C	8.34465e-07
chrX	14524273	A	G	-9.53674e-07
chrX	14524273	A	T	1.72853e-06
chrX	14524274	T	A	8.34465e-07
chrX	14524274	T	C	6.55651e-07
chrX	14524274	T	G	-8.34465e-07
chrX	14524275	G	A	8.34465e-07
chrX	14524275	G	C	-1.07288e-06
chrX	14524275	G	T	9.53674e-07
chrX	14524276	T	A	1.3113e-06
chrX	14524276	T	C	8.34465e-07
chrX	14524276	T	G	-1.96695e-06
chrX	14524277	T	A	-1.96695e-06
chrX	14524277	T	C	-8.9407e-07
chrX	14524277	T	G	-1.54972e-06
chrX	14524278	G	A	2.68221e-06
chrX	14524278	G	C	1.3113e-06
chrX	14524278	G	T	2.32458e-06
chrX	14524279	T	A	-8.9407e-07
chrX	14524279	T	C	1.19209e-06
chrX	14524279	T	G	-2.5034e-06
chrX	14524280	C	A	-2.38419e-06
chrX	14524280	C	G	-2.14577e-06
chrX	14524280	C	T	3.8743e-06
chrX	14524281	C	A	2.563e-06
chrX	14524281	C	G	2.68221e-06
chrX	14524281	C	T	2.44379e-06
chrX	14524282	T	A	2.44379e-06
chrX	14524282	T	C	4.76837e-07
chrX	14524282	T	G	8.34465e-07
chrX	14524283	T	A	3.57628e-07
chrX	14524283	T	C	-5.96046e-08
chrX	14524283	T	G	2.86102e-06
chrX	14524284	T	A	3.57628e-07
chrX	14524284	T	C	-1.60933e-06
chrX	14524284	T	G	-1.19209e-06
chrX	14524285	T	A	2.02656e-06
chrX	14524285	T	C	-1.49012e-06
chrX	14524285	T	G	-8.34465e-07
chrX	14524286	T	A	1.49012e-06
chrX	14524286	T	C	3.8743e-06
chrX	14524286	T	G	-1.13249e-06
chrX	14524287	T	A	2.38419e-07
chrX	14524287	T	C	-2.20537e-06
chrX	14524287	T	G	-4.94719e-06
chrX	14524288	A	C	-4.94719e-06
chrX	14524288	A	G	-2.563e-06
chrX	14524288	A	T	-6.3777e-06
chrX	14524289	C	A	5.96046e-07
chrX	14524289	C	G	3.57628e-07
chrX	14524289	C	T	1.90735e-06
chrX	14524290	A	C	-8.34465e-07
chrX	14524290	A	G	-1.3113e-06
chrX	14524290	A	T	7.33137e-06
chrX	14524291	A	C	8.34465e-07
chrX	14524291	A	G	1.49012e-06
chrX	14524291	A	T	6.55651e-07
chrX	14524292	A	C	1.84774e-06
chrX	14524292	A	G	1.66893e-06
chrX	14524292	A	T	1.3113e-06
chrX	14524293	A	C	2.98023e-07
chrX	14524293	A	G	5.36442e-07
chrX	14524293	A	T	0
chrX	14524294	A	C	-5.96046e-08
chrX	14524294	A	G	5.96046e-07
chrX	14524294	A	T	1.90735e-06
chrX	14524295	A	C	1.13249e-06
chrX	14524295	A	G	-3.57628e-07
chrX	14524295	A	T	8.9407e-07
chrX	14524296	T	A	-1.01328e-06
chrX	14524296	T	C	-2.32458e-06
chrX	14524296	T	G	-2.98023e-07
chrX	14524297	A	C	-1.90735e-06
chrX	14524297	A	G	-1.2517e-06
chrX	14524297	A	T	-5.96046e-07
chrX	14524298	A	C	-2.80142e-06
chrX	14524298	A	G	-2.92063e-06
chrX	14524298	A	T	-2.98023e-07
chrX	14524299	T	A	-2.38419e-07
chrX	14524299	T	C	-4.17233e-07
chrX	14524299	T	G	-4.76837e-07
chrX	14524300	A	C	-3.39746e-06
chrX	14524300	A	G	-1.78814e-07
chrX	14524300	A	T	8.34465e-07
chrX	14524301	T	A	2.20537e-06
chrX	14524301	T	C	2.38419e-07
chrX	14524301	T	G	1.37091e-06
chrX	14524302	T	A	1.49012e-06
chrX	14524302	T	C	-2.14577e-06
chrX	14524302	T	G	1.2517e-06
chrX	14524303	T	A	5.96046e-07
chrX	14524303	T	C	-7.15256e-07
chrX	14524303	T	G	-1.01328e-06
chrX	14524304	C	A	2.08616e-06
chrX	14524304	C	G	2.68221e-06
chrX	14524304	C	T	2.32458e-06
chrX	14524305	T	A	2.44379e-06
chrX	14524305	T	C	-3.75509e-06
chrX	14524305	T	G	-4.76837e-07
chrX	14524306	T	A	3.39746e-06
chrX	14524306	T	C	-5.06639e-06
chrX	14524306	T	G	5.36442e-07
chrX	14524307	T	A	-2.98023e-07
chrX	14524307	T	C	-5.42402e-06
chrX	14524307	T	G	-2.68221e-06
chrX	14524308	A	C	-2.98023e-07
chrX	14524308	A	G	-3.15905e-06
chrX	14524308	A	T	2.98023e-07
chrX	14524309	A	C	5.96046e-08
chrX	14524309	A	G	-1.78814e-07
chrX	14524309	A	T	2.80142e-06
chrX	14524310	A	C	-2.68221e-06
chrX	14524310	A	G	-1.72853e-06
chrX	14524310	A	T	2.80142e-06
chrX	14524311	C	A	2.44379e-06
chrX	14524311	C	G	2.02656e-06
chrX	14524311	C	T	1.96695e-06
chrX	14524312	A	C	-2.44379e-06
chrX	14524312	A	G	-2.20537e-06
chrX	14524312	A	T	-5.96046e-08
chrX	14524313	T	A	-1.60933e-06
chrX	14524313	T	C	-5.96046e-08
chrX	14524313	T	G	-1.01328e-06
chrX	14524314	A	C	-1.72853e-06
chrX	14524314	A	G	1.2517e-06
chrX	14524314	A	T	1.49012e-06
chrX	14524315	G	A	-3.75509e-06
chrX	14524315	G	C	-7.15256e-07
chrX	14524315	G	T	0
chrX	14524316	A	C	-1.60933e-06
chrX	14524316	A	G	1.66893e-06
chrX	14524316	A	T	-3.57628e-07
chrX	14524317	A	C	-1.19209e-07
chrX	14524317	A	G	-8.9407e-07
chrX	14524317	A	T	-2.98023e-07
chrX	14524318	T	A	-1.90735e-06
chrX	14524318	T	C	-5.96046e-08
chrX	14524318	T	G	-1.07288e-06
chrX	14524319	A	C	-1.37091e-06
chrX	14524319	A	G	8.34465e-07
chrX	14524319	A	T	5.96046e-07
chrX	14524320	G	A	-7.15256e-07
chrX	14524320	G	C	-2.08616e-06
chrX	14524320	G	T	-1.07288e-06
chrX	14524321	T	A	-1.13249e-06
chrX	14524321	T	C	-1.49012e-06
chrX	14524321	T	G	8.34465e-07
chrX	14524322	A	C	-1.37091e-06
chrX	14524322	A	G	1.19209e-07
chrX	14524322	A	T	-8.34465e-07
chrX	14524323	A	C	-3.15905e-06
chrX	14524323	A	G	-2.80142e-06
chrX	14524323	A	T	8.34465e-07
chrX	14524324	T	A	-1.49012e-06
chrX	14524324	T	C	1.19209e-07
chrX	14524324	T	G	-2.92063e-06
chrX	14524325	T	A	-1.54972e-06
chrX	14524325	T	C	-1.60933e-06
chrX	14524325	T	G	-3.27826e-06
chrX	14524326	T	A	-7.7486e-07
chrX	14524326	T	C	-2.5034e-06
chrX	14524326	T	G	-3.75509e-06
chrX	14524327	T	A	-1.3113e-06
chrX	14524327	T	C	-5.66244e-06
chrX	14524327	T	G	-7.7486e-07
chrX	14524328	G	A	-1.72853e-06
chrX	14524328	G	C	-3.15905e-06
chrX	14524328	G	T	-2.5034e-06
chrX	14524329	T	A	1.78814e-07
chrX	14524329	T	C	-2.02656e-06
chrX	14524329	T	G	0
chrX	14524330	T	A	-1.19209e-07
chrX	14524330	T	C	-3.51667e-06
chrX	14524330	T	G	-1.2517e-06
chrX	14524331	C	A	-2.44379e-06
chrX	14524331	C	G	-8.34465e-07
chrX	14524331	C	T	-2.02656e-06
chrX	14524332	T	A	-1.43051e-06
chrX	14524332	T	C	-1.96695e-06
chrX	14524332	T	G	-2.44379e-06
chrX	14524333	A	C	-3.15905e-06
chrX	14524333	A	G	1.13249e-06
chrX	14524333	A	T	1.19209e-07
chrX	14524334	A	C	-4.11272e-06
chrX	14524334	A	G	-3.03984e-06
chrX	14524334	A	T	9.53674e-07
chrX	14524335	A	C	-3.15905e-06
chrX	14524335	A	G	-3.45707e-06
chrX	14524335	A	T	-1.78814e-06
chrX	14524336	C	A	-1.90735e-06
chrX	14524336	C	G	-3.27826e-06
chrX	14524336	C	T	-4.47035e-06
chrX	14524337	C	A	-2.80142e-06
chrX	14524337	C	G	-3.15905e-06
chrX	14524337	C	T	-2.68221e-06
chrX	14524338	G	A	-3.39746e-06
chrX	14524338	G	C	-1.72853e-06
chrX	14524338	G	T	-5.66244e-06
chrX	14524339	A	C	-9.47714e-06
chrX	14524339	A	G	-2.68221e-06
chrX	14524339	A	T	-3.63588e-06
chrX	14524340	G	A	-4.47035e-06
chrX	14524340	G	C	-3.27826e-06
chrX	14524340	G	T	-4.35114e-06
chrX	14524341	A	C	-4.47035e-06
chrX	14524341	A	G	-2.68221e-06
chrX	14524341	A	T	-2.563e-06
chrX	14524342	A	C	-1.43051e-06
chrX	14524342	A	G	-2.98023e-07
chrX	14524342	A	T	-1.07288e-06
chrX	14524343	T	A	1.19209e-07
chrX	14524343	T	C	-2.5034e-06
chrX	14524343	T	G	-2.38419e-07
chrX	14524344	T	A	-5.36442e-07
chrX	14524344	T	C	-3.57628e-07
chrX	14524344	T	G	-9.53674e-07
chrX	14524345	G	A	-8.9407e-07
chrX	14524345	G	C	-2.80142e-06
chrX	14524345	G	T	-4.29153e-06
chrX	14524346	G	A	-2.68221e-06
chrX	14524346	G	C	-1.90735e-06
chrX	14524346	G	T	-2.14577e-06
chrX	14524347	A	C	5.96046e-08
chrX	14524347	A	G	-2.98023e-06
chrX	14524347	A	T	5.96046e-08
chrX	14524348	A	C	-1.78814e-06
chrX	14524348	A	G	-6.55651e-07
chrX	14524348	A	T	-7.15256e-07
chrX	14524349	A	C	-2.86102e-06
chrX	14524349	A	G	-2.98023e-07
chrX	14524349	A	T	7.15256e-07
chrX	14524350	T	A	-5.36442e-07
chrX	14524350	T	C	-8.9407e-07
chrX	14524350	T	G	-1.78814e-06
chrX	14524351	T	A	-8.9407e-07
chrX	14524351	T	C	-4.76837e-07
chrX	14524351	T	G	-4.17233e-07
chrX	14524352	G	A	-5.72205e-06
chrX	14524352	G	C	-5.42402e-06
chrX	14524352	G	T	-5.54323e-06
chrX	14524353	A	C	-1.3113e-06
chrX	14524353	A	G	-2.86102e-06
chrX	14524353	A	T	-4.05312e-06
chrX	14524354	A	C	-3.15905e-06
chrX	14524354	A	G	-3.69549e-06
chrX	14524354	A	T	-4.17233e-07
chrX	14524355	G	A	-1.84774e-06
chrX	14524355	G	C	-1.055e-05
chrX	14524355	G	T	-7.7486e-07
chrX	14524356	C	A	3.57628e-07
chrX	14524356	C	G	-1.72853e-06
chrX	14524356	C	T	-3.63588e-06
chrX	14524357	A	C	4.17233e-07
chrX	14524357	A	G	-4.23193e-06
chrX	14524357	A	T	-1.19209e-07
chrX	14524358	C	A	1.01328e-06
chrX	14524358	C	G	1.78814e-06
chrX	14524358	C	T	2.68221e-06
chrX	14524359	G	A	3.93391e-06
chrX	14524359	G	C	1.3113e-06
chrX	14524359	G	T	2.563e-06
chrX	14524360	G	A	1.90735e-06
chrX	14524360	G	C	-1.19209e-07
chrX	14524360	G	T	4.94719e-06
chrX	14524361	C	A	2.14577e-06
chrX	14524361	C	G	2.563e-06
chrX	14524361	C	T	3.39746e-06
chrX	14524362	C	A	2.86102e-06
chrX	14524362	C	G	2.02656e-06
chrX	14524362	C	T	1.49012e-06
chrX	14524363	A	C	8.9407e-07
chrX	14524363	A	G	-9.53674e-07
chrX	14524363	A	T	7.7486e-07
chrX	14524364	A	C	-9.53674e-07
chrX	14524364	A	G	4.17233e-07
chrX	14524364	A	T	8.34465e-07
chrX	14524365	A	C	-2.08616e-06
chrX	14524365	A	G	6.55651e-07
chrX	14524365	A	T	4.76837e-07
chrX	14524366	A	C	-2.68221e-06
chrX	14524366	A	G	-4.76837e-07
chrX	14524366	A	T	5.36442e-07
chrX	14524367	C	A	-1.07288e-06
chrX	14524367	C	G	-1.37091e-06
chrX	14524367	C	T	-2.20537e-06
chrX	14524368	T	A	-5.96046e-08
chrX	14524368	T	C	-3.15905e-06
chrX	14524368	T	G	-6.55651e-07
chrX	14524369	A	C	-1.78814e-06
chrX	14524369	A	G	-2.74181e-06
chrX	14524369	A	T	-1.78814e-06
chrX	14524370	C	A	-3.8147e-06
chrX	14524370	C	G	-4.47035e-06
chrX	14524370	C	T	-3.33786e-06
chrX	14524371	A	C	1.78814e-07
chrX	14524371	A	G	1.01328e-06
chrX	14524371	A	T	-1.84774e-06
chrX	14524372	A	C	-3.75509e-06
chrX	14524372	A	G	-2.44379e-06
chrX	14524372	A	T	-1.13249e-06
chrX	14524373	T	A	-4.17233e-07
chrX	14524373	T	C	-1.19209e-06
chrX	14524373	T	G	-3.51667e-06
chrX	14524374	T	A	-1.43051e-06
chrX	14524374	T	C	1.13249e-06
chrX	14524374	T	G	-2.44379e-06
chrX	14524375	G	A	1.13249e-06
chrX	14524375	G	C	-1.37091e-06
chrX	14524375	G	T	1.78814e-07
chrX	14524376	T	A	-5.96046e-08
chrX	14524376	T	C	-7.15256e-07
chrX	14524376	T	G	-4.70877e-06
chrX	14524377	A	C	-3.33786e-06
chrX	14524377	A	G	-2.14577e-06
chrX	14524377	A	T	-2.68221e-06
chrX	14524378	T	A	-5.36442e-07
chrX	14524378	T	C	-1.2517e-06
chrX	14524378	T	G	-3.8147e-06
chrX	14524379	T	A	-7.7486e-07
chrX	14524379	T	C	-4.76837e-07
chrX	14524379	T	G	-3.8743e-06
chrX	14524380	A	C	4.76837e-07
chrX	14524380	A	G	-1.3113e-06
chrX	14524380	A	T	2.08616e-06
chrX	14524381	G	A	3.99351e-06
chrX	14524381	G	C	2.563e-06
chrX	14524381	G	T	5.06639e-06
chrX	14524382	G	A	5.36442e-07
chrX	14524382	G	C	8.9407e-07
chrX	14524382	G	T	1.49012e-06
chrX	14524383	G	A	3.63588e-06
chrX	14524383	G	C	2.20537e-06
chrX	14524383	G	T	-2.563e-06
chrX	14524384	T	A	-1.54972e-06
chrX	14524384	T	C	-1.43051e-06
chrX	14524384	T	G	-2.98023e-06
chrX	14524385	T	A	-3.15905e-06
chrX	14524385	T	C	-3.57628e-06
chrX	14524385	T	G	-2.74181e-06
chrX	14524386	C	A	-1.84774e-06
chrX	14524386	C	G	1.13249e-06
chrX	14524386	C	T	-2.44379e-06
chrX	14524387	C	A	-5.1856e-06
chrX	14524387	C	G	1.90735e-06
chrX	14524387	C	T	-3.63588e-06
chrX	14524388	A	C	-1.13249e-06
chrX	14524388	A	G	3.27826e-06
chrX	14524388	A	T	-4.76837e-07
chrX	14524389	A	C	8.9407e-07
chrX	14524389	A	G	5.06639e-06
chrX	14524389	A	T	4.35114e-06
chrX	14524390	A	C	-1.3113e-06
chrX	14524390	A	G	1.01328e-06
chrX	14524390	A	T	3.63588e-06
chrX	14524391	T	A	-4.41074e-06
chrX	14524391	T	C	3.57628e-07
chrX	14524391	T	G	-2.563e-06
chrX	14524392	A	C	2.08616e-06
chrX	14524392	A	G	2.98023e-07
chrX	14524392	A	T	-2.6226e-06
chrX	14524393	A	C	8.9407e-07
chrX	14524393	A	G	1.19209e-06
chrX	14524393	A	T	2.02656e-06
chrX	14524394	G	A	2.38419e-07
chrX	14524394	G	C	1.78814e-07
chrX	14524394	G	T	7.7486e-07
chrX	14524395	T	A	-2.14577e-06
chrX	14524395	T	C	-4.76837e-07
chrX	14524395	T	G	-2.44379e-06
chrX	14524396	T	A	7.7486e-07
chrX	14524396	T	C	2.44379e-06
chrX	14524396	T	G	-2.26498e-06
chrX	14524397	C	A	-1.07288e-06
chrX	14524397	C	G	-3.75509e-06
chrX	14524397	C	T	-5.1856e-06
chrX	14524398	T	A	-2.5034e-06
chrX	14524398	T	C	-2.38419e-06
chrX	14524398	T	G	-6.25849e-06
chrX	14524399	G	A	-4.17233e-07
chrX	14524399	G	C	-2.5034e-06
chrX	14524399	G	T	1.90735e-06
chrX	14524400	G	A	2.98023e-06
chrX	14524400	G	C	2.98023e-07
chrX	14524400	G	T	4.11272e-06
chrX	14524401	G	A	3.75509e-06
chrX	14524401	G	C	5.96046e-08
chrX	14524401	G	T	4.47035e-06
chrX	14524402	G	A	2.563e-06
chrX	14524402	G	C	2.08616e-06
chrX	14524402	G	T	5.30481e-06
chrX	14524403	A	C	-2.98023e-06
chrX	14524403	A	G	-2.26498e-06
chrX	14524403	A	T	1.72853e-06
chrX	14524404	A	C	5.96046e-08
chrX	14524404	A	G	-3.8743e-06
chrX	14524404	A	T	4.23193e-06
chrX	14524405	A	C	3.15905e-06
chrX	14524405	A	G	2.44379e-06
chrX	14524405	A	T	2.38419e-06
chrX	14524406	A	C	8.34465e-07
chrX	14524406	A	G	2.02656e-06
chrX	14524406	A	T	2.68221e-06
chrX	14524407	A	C	8.34465e-07
chrX	14524407	A	G	1.07288e-06
chrX	14524407	A	T	1.78814e-07
chrX	14524408	T	A	2.38419e-07
chrX	14524408	T	C	1.60933e-06
chrX	14524408	T	G	2.38419e-07
chrX	14524409	T	A	-8.9407e-07
chrX	14524409	T	C	-3.8147e-06
chrX	14524409	T	G	-1.78814e-06
chrX	14524410	C	A	1.49012e-06
chrX	14524410	C	G	-4.82798e-06
chrX	14524410	C	T	2.563e-06
chrX	14524411	A	C	-8.76188e-06
chrX	14524411	A	G	-2.5034e-06
chrX	14524411	A	T	-1.66893e-06
chrX	14524412	T	A	-1.38283e-05
chrX	14524412	T	C	-3.15905e-06
chrX	14524412	T	G	-2.02656e-06
chrX	14524413	A	C	-1.96695e-06
chrX	14524413	A	G	-1.2517e-06
chrX	14524413	A	T	1.13249e-06
chrX	14524414	A	C	-1.19209e-06
chrX	14524414	A	G	-1.43051e-06
chrX	14524414	A	T	7.15256e-07
chrX	14524415	T	A	-1.96695e-06
chrX	14524415	T	C	-4.94719e-06
chrX	14524415	T	G	-3.15905e-06
chrX	14524416	T	A	1.54972e-06
chrX	14524416	T	C	-2.14577e-06
chrX	14524416	T	G	-1.19209e-06
chrX	14524417	T	A	7.15256e-07
chrX	14524417	T	C	-1.84774e-06
chrX	14524417	T	G	-1.96695e-06
chrX	14524418	T	A	-5.96046e-08
chrX	14524418	T	C	-2.68221e-06
chrX	14524418	T	G	-4.11272e-06
chrX	14524419	T	A	1.07288e-06
chrX	14524419	T	C	-4.47035e-06
chrX	14524419	T	G	-5.54323e-06
chrX	14524420	T	A	4.76837e-07
chrX	14524420	T	C	-5.54323e-06
chrX	14524420	T	G	-3.27826e-06
chrX	14524421	T	A	8.34465e-07
chrX	14524421	T	C	-7.92742e-06
chrX	14524421	T	G	-4.82798e-06
chrX	14524422	A	C	-9.11951e-06
chrX	14524422	A	G	-8.28505e-06
chrX	14524422	A	T	-4.76837e-07
chrX	14524423	T	A	5.36442e-07
chrX	14524423	T	C	-4.58956e-06
chrX	14524423	T	G	9.53674e-07
chrX	14524424	T	A	1.72853e-06
chrX	14524424	T	C	-6.73532e-06
chrX	14524424	T	G	-2.74181e-06
chrX	14524425	T	A	7.7486e-07
chrX	14524425	T	C	-3.09944e-06
chrX	14524425	T	G	-4.17233e-06
chrX	14524426	G	A	4.70877e-06
chrX	14524426	G	C	4.23193e-06
chrX	14524426	G	T	3.39746e-06
chrX	14524427	C	A	5.90086e-06
chrX	14524427	C	G	4.23193e-06
chrX	14524427	C	T	4.58956e-06
chrX	14524428	G	A	6.49691e-06
chrX	14524428	G	C	3.51667e-06
chrX	14524428	G	T	2.68221e-06
chrX	14524429	T	A	-5.96046e-07
chrX	14524429	T	C	-6.13928e-06
chrX	14524429	T	G	1.2517e-06
chrX	14524430	A	C	-2.14577e-06
chrX	14524430	A	G	-5.1856e-06
chrX	14524430	A	T	3.39746e-06
chrX	14524431	T	A	8.34465e-07
chrX	14524431	T	C	-4.35114e-06
chrX	14524431	T	G	-5.1856e-06
chrX	14524432	C	A	2.80142e-06
chrX	14524432	C	G	3.99351e-06
chrX	14524432	C	T	5.06639e-06
chrX	14524433	A	C	-1.72853e-06
chrX	14524433	A	G	-1.59144e-05
chrX	14524433	A	T	6.55651e-07
chrX	14524434	A	C	-4.23193e-06
chrX	14524434	A	G	-6.3777e-06
chrX	14524434	A	T	-2.08616e-06
chrX	14524435	T	A	-3.15905e-06
chrX	14524435	T	C	-1.01328e-06
chrX	14524435	T	G	-5.96046e-08
chrX	14524436	T	A	2.02656e-06
chrX	14524436	T	C	-1.19209e-07
chrX	14524436	T	G	-3.09944e-06
chrX	14524437	T	A	2.38419e-07
chrX	14524437	T	C	-2.98023e-07
chrX	14524437	T	G	-7.21216e-06
chrX	14524438	A	C	-5.96046e-08
chrX	14524438	A	G	-1.07884e-05
chrX	14524438	A	T	-3.39746e-06
chrX	14524439	T	A	-2.14577e-06
chrX	14524439	T	C	-2.86102e-06
chrX	14524439	T	G	-4.82798e-06
chrX	14524440	A	C	-4.29153e-06
chrX	14524440	A	G	-1.2517e-06
chrX	14524440	A	T	3.15905e-06
chrX	14524441	A	C	-1.01328e-06
chrX	14524441	A	G	2.98023e-07
chrX	14524441	A	T	2.32458e-06
chrX	14524442	A	C	-3.03984e-06
chrX	14524442	A	G	-2.80142e-06
chrX	14524442	A	T	-2.38419e-07
chrX	14524443	A	C	-4.47035e-06
chrX	14524443	A	G	-1.66893e-06
chrX	14524443	A	T	2.68221e-06
chrX	14524444	T	A	-2.20537e-06
chrX	14524444	T	C	-2.38419e-06
chrX	14524444	T	G	-1.84774e-06
chrX	14524445	G	A	3.63588e-06
chrX	14524445	G	C	-1.66893e-06
chrX	14524445	G	T	3.27826e-06
chrX	14524446	T	A	-1.43051e-06
chrX	14524446	T	C	-2.80142e-06
chrX	14524446	T	G	-5.96046e-07
chrX	14524447	T	A	-8.34465e-07
chrX	14524447	T	C	-1.00732e-05
chrX	14524447	T	G	-3.39746e-06
chrX	14524448	G	A	2.68221e-06
chrX	14524448	G	C	2.20537e-06
chrX	14524448	G	T	1.37091e-06
chrX	14524449	T	A	-1.3113e-06
chrX	14524449	T	C	-2.38419e-06
chrX	14524449	T	G	-1.07288e-06
chrX	14524450	C	A	-1.01328e-06
chrX	14524450	C	G	2.02656e-06
chrX	14524450	C	T	3.75509e-06
chrX	14524451	A	C	-1.00136e-05
chrX	14524451	A	G	-4.23193e-06
chrX	14524451	A	T	-1.07288e-06
chrX	14524452	A	C	-6.02007e-06
chrX	14524452	A	G	-1.19209e-07
chrX	14524452	A	T	-3.27826e-06
chrX	14524453	C	A	-3.21865e-06
chrX	14524453	C	G	4.35114e-06
chrX	14524453	C	T	4.11272e-06
chrX	14524454	A	C	-2.74181e-06
chrX	14524454	A	G	4.70877e-06
chrX	14524454	A	T	-2.38419e-07
chrX	14524455	A	C	-3.27826e-06
chrX	14524455	A	G	3.03984e-06
chrX	14524455	A	T	2.44379e-06
chrX	14524456	A	C	-2.80142e-06
chrX	14524456	A	G	4.76837e-07
chrX	14524456	A	T	9.53674e-07
chrX	14524457	G	A	-5.96046e-07
chrX	14524457	G	C	-6.13928e-06
chrX	14524457	G	T	-1.66893e-06
chrX	14524458	T	A	3.45707e-06
chrX	14524458	T	C	-1.13249e-06
chrX	14524458	T	G	4.11272e-06
chrX	14524459	T	A	1.3113e-06
chrX	14524459	T	C	-4.70877e-06
chrX	14524459	T	G	-2.563e-06
chrX	14524460	T	A	-1.60933e-06
chrX	14524460	T	C	-4.17233e-07
chrX	14524460	T	G	-4.94719e-06
chrX	14524461	T	A	5.66244e-06
chrX	14524461	T	C	5.96046e-08
chrX	14524461	T	G	3.21865e-06
chrX	14524462	T	A	-9.71556e-06
chrX	14524462	T	C	-2.80142e-06
chrX	14524462	T	G	7.7486e-07
chrX	14524463	T	A	-1.84774e-06
chrX	14524463	T	C	-8.34465e-07
chrX	14524463	T	G	-6.55651e-07
chrX	14524464	C	A	2.74181e-06
chrX	14524464	C	G	-3.03984e-06
chrX	14524464	C	T	4.17233e-07
chrX	14524465	A	C	-7.80821e-06
chrX	14524465	A	G	1.07288e-06
chrX	14524465	A	T	-5.66244e-06
chrX	14524466	T	A	-2.86102e-06
chrX	14524466	T	C	-4.94719e-06
chrX	14524466	T	G	1.01328e-06
chrX	14524467	T	A	-7.56979e-06
chrX	14524467	T	C	-7.15256e-07
chrX	14524467	T	G	-3.03984e-06
chrX	14524468	T	A	-7.689e-06
chrX	14524468	T	C	-7.45058e-06
chrX	14524468	T	G	-6.61612e-06
chrX	14524469	C	A	-3.63588e-06
chrX	14524469	C	G	-7.45058e-06
chrX	14524469	C	T	-2.44379e-06
chrX	14524470	G	A	-2.20537e-06
chrX	14524470	G	C	1.66893e-06
chrX	14524470	G	T	-3.03984e-06
chrX	14524471	A	C	-1.2517e-05
chrX	14524471	A	G	-3.93391e-06
chrX	14524471	A	T	-3.33786e-06
chrX	14524472	G	A	5.36442e-07
chrX	14524472	G	C	-4.52995e-06
chrX	14524472	G	T	0
chrX	14524473	G	A	1.54972e-06
chrX	14524473	G	C	5.36442e-07
chrX	14524473	G	T	2.98023e-07
chrX	14524474	T	A	5.78165e-06
chrX	14524474	T	C	2.08616e-06
chrX	14524474	T	G	6.55651e-07
chrX	14524475	A	C	-4.58956e-06
chrX	14524475	A	G	1.01328e-06
chrX	14524475	A	T	-2.98023e-06
chrX	14524476	G	A	1.96695e-06
chrX	14524476	G	C	6.55651e-07
chrX	14524476	G	T	-1.49012e-06
chrX	14524477	T	A	1.96695e-06
chrX	14524477	T	C	5.96046e-08
chrX	14524477	T	G	-2.08616e-06
chrX	14524478	T	A	5.90086e-06
chrX	14524478	T	C	-3.51667e-06
chrX	14524478	T	G	1.90735e-06
chrX	14524479	T	A	1.49012e-06
chrX	14524479	T	C	-5.60284e-06
chrX	14524479	T	G	-1.2517e-06
chrX	14524480	T	A	-4.82798e-06
chrX	14524480	T	C	-1.00136e-05
chrX	14524480	T	G	-1.01924e-05
chrX	14524481	A	C	-7.09295e-06
chrX	14524481	A	G	-5.30481e-06
chrX	14524481	A	T	-2.08616e-06
chrX	14524482	A	C	-7.21216e-06
chrX	14524482	A	G	-1.96695e-06
chrX	14524482	A	T	-1.54972e-06
chrX	14524483	A	C	-4.47035e-06
chrX	14524483	A	G	1.01328e-06
chrX	14524483	A	T	-5.36442e-07
chrX	14524484	A	C	-9.95398e-06
chrX	14524484	A	G	-6.61612e-06
chrX	14524484	A	T	-3.51667e-06
chrX	14524485	A	C	-5.1856e-06
chrX	14524485	A	G	-7.7486e-07
chrX	14524485	A	T	-3.51667e-06
chrX	14524486	C	A	9.53674e-07
chrX	14524486	C	G	-1.13249e-06
chrX	14524486	C	T	-4.41074e-06
chrX	14524487	C	A	1.2517e-06
chrX	14524487	C	G	-7.80821e-06
chrX	14524487	C	T	1.96695e-06
chrX	14524488	T	A	-2.5034e-06
chrX	14524488	T	C	-6.49691e-06
chrX	14524488	T	G	-8.46386e-06
chrX	14524489	A	C	-8.04663e-06
chrX	14524489	A	G	-8.9407e-06
chrX	14524489	A	T	-7.689e-06
chrX	14524490	T	A	-4.11272e-06
chrX	14524490	T	C	1.78814e-07
chrX	14524490	T	G	-5.90086e-06
chrX	14524491	T	A	-1.10269e-05
chrX	14524491	T	C	-6.3777e-06
chrX	14524491	T	G	-3.75509e-06
chrX	14524492	A	C	1.13249e-06
chrX	14524492	A	G	-6.73532e-06
chrX	14524492	A	T	-4.35114e-06
chrX	14524493	A	C	8.34465e-07
chrX	14524493	A	G	-4.47035e-06
chrX	14524493	A	T	-5.06639e-06
chrX	14524494	C	A	3.15905e-06
chrX	14524494	C	G	-6.55651e-07
chrX	14524494	C	T	1.13249e-06
chrX	14524495	A	C	-5.54323e-06
chrX	14524495	A	G	-9.77516e-06
chrX	14524495	A	T	-1.19209e-06
chrX	14524496	C	A	3.99351e-06
chrX	14524496	C	G	2.38419e-06
chrX	14524496	C	T	6.25849e-06
chrX	14524497	C	A	-2.6226e-06
chrX	14524497	C	G	-9.0003e-06
chrX	14524497	C	T	1.72853e-06
chrX	14524498	C	A	5.66244e-06
chrX	14524498	C	G	-1.43051e-06
chrX	14524498	C	T	8.76188e-06
chrX	14524499	T	A	-4.58956e-06
chrX	14524499	T	C	-5.66244e-06
chrX	14524499	T	G	-5.54323e-06
chrX	14524500	C	A	-4.11272e-06
chrX	14524500	C	G	-3.09944e-06
chrX	14524500	C	T	-4.82798e-06
chrX	14524501	A	C	-6.02007e-06
chrX	14524501	A	G	-4.64916e-06
chrX	14524501	A	T	2.08616e-06
chrX	14524502	G	A	-3.57628e-07
chrX	14524502	G	C	5.96046e-07
chrX	14524502	G	T	2.98023e-07
chrX	14524503	A	C	8.9407e-07
chrX	14524503	A	G	4.94719e-06
chrX	14524503	A	T	-4.11272e-06
chrX	14524504	T	A	2.44379e-06
chrX	14524504	T	C	-3.99351e-06
chrX	14524504	T	G	-1.54972e-06
chrX	14524505	T	A	-5.1856e-06
chrX	14524505	T	C	-8.34465e-07
chrX	14524505	T	G	-2.80142e-06
chrX	14524506	C	A	-2.563e-06
chrX	14524506	C	G	-3.39746e-06
chrX	14524506	C	T	-1.07288e-06
chrX	14524507	C	A	-2.20537e-06
chrX	14524507	C	G	-6.49691e-06
chrX	14524507	C	T	-3.27826e-06
chrX	14524508	C	A	9.71556e-06
chrX	14524508	C	G	-1.37091e-06
chrX	14524508	C	T	-2.32458e-06
chrX	14524509	T	A	4.94719e-06
chrX	14524509	T	C	1.43051e-06
chrX	14524509	T	G	-3.03984e-06
chrX	14524510	A	C	-4.58956e-06
chrX	14524510	A	G	-3.57628e-07
chrX	14524510	A	T	-4.11272e-06
chrX	14524511	T	A	1.3113e-06
chrX	14524511	T	C	5.30481e-06
chrX	14524511	T	G	-3.39746e-06
chrX	14524512	T	A	2.44379e-06
chrX	14524512	T	C	4.11272e-06
chrX	14524512	T	G	-1.3113e-06
chrX	14524513	T	A	2.86102e-06
chrX	14524513	T	C	7.15256e-07
chrX	14524513	T	G	-1.19209e-07
chrX	14524514	G	A	-9.53674e-07
chrX	14524514	G	C	-8.22544e-06
chrX	14524514	G	T	-1.72853e-06
chrX	14524515	G	A	3.51667e-06
chrX	14524515	G	C	-8.9407e-06
chrX	14524515	G	T	-3.09944e-06
chrX	14524516	A	C	-3.74913e-05
chrX	14524516	A	G	-1.44839e-05
chrX	14524516	A	T	-5.84126e-06
chrX	14524517	G	A	-2.14577e-06
chrX	14524517	G	C	-9.23872e-06
chrX	14524517	G	T	3.63588e-06
chrX	14524518	C	A	-1.88947e-05
chrX	14524518	C	G	-1.40071e-05
chrX	14524518	C	T	-1.60336e-05
chrX	14524519	C	A	2.26498e-06
chrX	14524519	C	G	-1.46031e-05
chrX	14524519	C	T	-1.66893e-06
chrX	14524520	A	C	-4.11272e-06
chrX	14524520	A	G	-6.25849e-06
chrX	14524520	A	T	-3.8743e-06
chrX	14524521	C	A	3.69549e-06
chrX	14524521	C	G	1.96695e-06
chrX	14524521	C	T	1.84774e-06
chrX	14524522	T	A	3.27826e-06
chrX	14524522	T	C	-8.04663e-06
chrX	14524522	T	G	-2.20537e-06
chrX	14524523	T	A	3.03984e-06
chrX	14524523	T	C	6.55651e-07
chrX	14524523	T	G	-4.52995e-06
chrX	14524524	A	C	1.78814e-06
chrX	14524524	A	G	5.78165e-06
chrX	14524524	A	T	-4.82798e-06
chrX	14524525	T	A	-1.01328e-06
chrX	14524525	T	C	-4.35114e-06
chrX	14524525	T	G	-1.16825e-05
chrX	14524526	T	A	9.53674e-07
chrX	14524526	T	C	-6.3777e-06
chrX	14524526	T	G	4.70877e-06
chrX	14524527	T	A	1.19209e-06
chrX	14524527	T	C	-1.96695e-06
chrX	14524527	T	G	2.92063e-06
chrX	14524528	T	A	-7.7486e-07
chrX	14524528	T	C	6.55651e-07
chrX	14524528	T	G	4.76837e-07
chrX	14524529	A	C	-8.70228e-06
chrX	14524529	A	G	-2.38419e-07
chrX	14524529	A	T	-2.38419e-07
chrX	14524530	G	A	-6.49691e-06
chrX	14524530	G	C	4.17233e-07
chrX	14524530	G	T	3.51667e-06
chrX	14524531	A	C	-4.70877e-06
chrX	14524531	A	G	1.37091e-06
chrX	14524531	A	T	-3.57628e-07
chrX	14524532	C	A	-9.23872e-06
chrX	14524532	C	G	2.80142e-06
chrX	14524532	C	T	-5.42402e-06
chrX	14524533	T	A	-2.98023e-06
chrX	14524533	T	C	-9.83477e-06
chrX	14524533	T	G	-4.70877e-06
chrX	14524534	T	A	-2.68221e-06
chrX	14524534	T	C	5.96046e-08
chrX	14524534	T	G	-2.38419e-07
chrX	14524535	C	A	3.75509e-06
chrX	14524535	C	G	1.01328e-06
chrX	14524535	C	T	-1.96695e-06
chrX	14524536	T	A	7.15256e-07
chrX	14524536	T	C	-7.33137e-06
chrX	14524536	T	G	-1.01924e-05
chrX	14524537	G	A	-2.38419e-07
chrX	14524537	G	C	-7.09295e-06
chrX	14524537	G	T	-5.90086e-06
chrX	14524538	T	A	-1.0252e-05
chrX	14524538	T	C	-1.65105e-05
chrX	14524538	T	G	-1.46627e-05
chrX	14524539	C	A	2.32458e-06
chrX	14524539	C	G	-7.09295e-06
chrX	14524539	C	T	-5.96046e-08
chrX	14524540	C	A	-3.8743e-06
chrX	14524540	C	G	-1.41859e-05
chrX	14524540	C	T	9.53674e-07
chrX	14524541	G	A	-2.08616e-06
chrX	14524541	G	C	3.09944e-06
chrX	14524541	G	T	3.45707e-06
chrX	14524542	A	C	-2.83122e-05
chrX	14524542	A	G	-1.37091e-06
chrX	14524542	A	T	2.563e-06
chrX	14524543	T	A	-5.54323e-06
chrX	14524543	T	C	-1.66297e-05
chrX	14524543	T	G	-4.23193e-06
chrX	14524544	C	A	4.11272e-06
chrX	14524544	C	G	3.57628e-07
chrX	14524544	C	T	-3.15905e-06
chrX	14524545	C	A	1.24574e-05
chrX	14524545	C	G	3.03984e-06
chrX	14524545	C	T	5.42402e-06
chrX	14524546	G	A	3.39746e-06
chrX	14524546	G	C	-1.13249e-06
chrX	14524546	G	T	3.57628e-07
chrX	14524547	A	C	-3.99351e-06
chrX	14524547	A	G	-3.8743e-06
chrX	14524547	A	T	3.39746e-06
chrX	14524548	T	A	-8.34465e-07
chrX	14524548	T	C	-1.46031e-05
chrX	14524548	T	G	-6.02007e-06
chrX	14524549	C	A	3.99351e-06
chrX	14524549	C	G	3.63588e-06
chrX	14524549	C	T	8.64267e-06
chrX	14524550	G	A	6.73532e-06
chrX	14524550	G	C	-6.02007e-06
chrX	14524550	G	T	1.78814e-06
chrX	14524551	C	A	8.9407e-07
chrX	14524551	C	G	-4.29153e-06
chrX	14524551	C	T	2.86102e-06
chrX	14524552	A	C	-4.11272e-06
chrX	14524552	A	G	-6.13928e-06
chrX	14524552	A	T	-2.98023e-07
chrX	14524553	C	A	3.57628e-07
chrX	14524553	C	G	-2.14577e-06
chrX	14524553	C	T	-2.08616e-06
chrX	14524554	T	A	2.32458e-06
chrX	14524554	T	C	-1.09076e-05
chrX	14524554	T	G	-8.34465e-06
chrX	14524555	T	A	-4.11272e-06
chrX	14524555	T	C	-2.80142e-06
chrX	14524555	T	G	-1.20997e-05
chrX	14524556	C	A	-1.07288e-05
chrX	14524556	C	G	-8.58307e-06
chrX	14524556	C	T	-1.90139e-05
chrX	14524557	T	A	-3.63588e-06
chrX	14524557	T	C	-1.43051e-06
chrX	14524557	T	G	-1.88947e-05
chrX	14524558	T	A	-9.53674e-06
chrX	14524558	T	C	-1.20997e-05
chrX	14524558	T	G	-4.70877e-06
chrX	14524559	G	A	-6.97374e-06
chrX	14524559	G	C	-8.28505e-06
chrX	14524559	G	T	-1.10865e-05
chrX	14524560	T	A	5.06639e-06
chrX	14524560	T	C	-7.45058e-06
[truncated: 10,288 more rows]
