# Supplementary material for: Modeling transcriptional regulation of model species with deep learning
Source: HighWire-hosted journal article supplement (doi:10.1101/gr.266171.120), 2021-04-22
Supplement: Supplemental_Table_S12.xlsx [file Supplemental_Table_S12.xlsx]

## Sheet: Sheet1
Supplemental Table S12: Results from conducting in silico saturated mutagenesis for SDC-3 binding (accession no. SRX2228883) at the third high-confidence DCC binding site (ce11:ChrX:11092096-11096190) on the C. elegans X Chromosome.
# Reference prediction:	0.997728
Chromosome	Position	Reference Allele	Alternative Allele	DeepArk Prediction (accession no. SRX2228883)
chrX	11092095	A	C	0
chrX	11092095	A	G	0
chrX	11092095	A	T	0
chrX	11092096	A	C	0
chrX	11092096	A	G	0
chrX	11092096	A	T	0
chrX	11092097	T	A	0
chrX	11092097	T	C	0
chrX	11092097	T	G	0
chrX	11092098	A	C	0
chrX	11092098	A	G	0
chrX	11092098	A	T	0
chrX	11092099	T	A	0
chrX	11092099	T	C	0
chrX	11092099	T	G	0
chrX	11092100	A	C	0
chrX	11092100	A	G	0
chrX	11092100	A	T	0
chrX	11092101	C	A	0
chrX	11092101	C	G	0
chrX	11092101	C	T	0
chrX	11092102	G	A	0
chrX	11092102	G	C	0
chrX	11092102	G	T	0
chrX	11092103	C	A	0
chrX	11092103	C	G	0
chrX	11092103	C	T	0
chrX	11092104	A	C	0
chrX	11092104	A	G	0
chrX	11092104	A	T	0
chrX	11092105	A	C	0
chrX	11092105	A	G	0
chrX	11092105	A	T	0
chrX	11092106	G	A	0
chrX	11092106	G	C	0
chrX	11092106	G	T	0
chrX	11092107	A	C	0
chrX	11092107	A	G	0
chrX	11092107	A	T	0
chrX	11092108	A	C	0
chrX	11092108	A	G	0
chrX	11092108	A	T	0
chrX	11092109	C	A	0
chrX	11092109	C	G	0
chrX	11092109	C	T	0
chrX	11092110	A	C	0
chrX	11092110	A	G	0
chrX	11092110	A	T	0
chrX	11092111	A	C	0
chrX	11092111	A	G	0
chrX	11092111	A	T	0
chrX	11092112	A	C	0
chrX	11092112	A	G	0
chrX	11092112	A	T	0
chrX	11092113	G	A	-5.96046e-08
chrX	11092113	G	C	0
chrX	11092113	G	T	0
chrX	11092114	A	C	0
chrX	11092114	A	G	0
chrX	11092114	A	T	0
chrX	11092115	T	A	0
chrX	11092115	T	C	-5.96046e-08
chrX	11092115	T	G	0
chrX	11092116	G	A	-5.96046e-08
chrX	11092116	G	C	0
chrX	11092116	G	T	-5.96046e-08
chrX	11092117	C	A	-5.96046e-08
chrX	11092117	C	G	-5.96046e-08
chrX	11092117	C	T	-5.96046e-08
chrX	11092118	G	A	0
chrX	11092118	G	C	0
chrX	11092118	G	T	0
chrX	11092119	T	A	0
chrX	11092119	T	C	-5.96046e-08
chrX	11092119	T	G	0
chrX	11092120	G	A	-5.96046e-08
chrX	11092120	G	C	0
chrX	11092120	G	T	0
chrX	11092121	A	C	0
chrX	11092121	A	G	0
chrX	11092121	A	T	0
chrX	11092122	C	A	0
chrX	11092122	C	G	-5.96046e-08
chrX	11092122	C	T	0
chrX	11092123	G	A	0
chrX	11092123	G	C	0
chrX	11092123	G	T	0
chrX	11092124	T	A	-5.96046e-08
chrX	11092124	T	C	0
chrX	11092124	T	G	-5.96046e-08
chrX	11092125	G	A	0
chrX	11092125	G	C	-5.96046e-08
chrX	11092125	G	T	0
chrX	11092126	T	A	-5.96046e-08
chrX	11092126	T	C	5.96046e-08
chrX	11092126	T	G	0
chrX	11092127	G	A	-5.96046e-08
chrX	11092127	G	C	-5.96046e-08
chrX	11092127	G	T	-5.96046e-08
chrX	11092128	A	C	0
chrX	11092128	A	G	-5.96046e-08
chrX	11092128	A	T	-5.96046e-08
chrX	11092129	G	A	0
chrX	11092129	G	C	-5.96046e-08
chrX	11092129	G	T	5.96046e-08
chrX	11092130	C	A	-1.19209e-07
chrX	11092130	C	G	-5.96046e-08
chrX	11092130	C	T	-1.19209e-07
chrX	11092131	T	A	-5.96046e-08
chrX	11092131	T	C	0
chrX	11092131	T	G	-1.78814e-07
chrX	11092132	A	C	5.96046e-08
chrX	11092132	A	G	0
chrX	11092132	A	T	0
chrX	11092133	C	A	-1.19209e-07
chrX	11092133	C	G	-5.96046e-08
chrX	11092133	C	T	-1.19209e-07
chrX	11092134	A	C	-5.96046e-08
chrX	11092134	A	G	0
chrX	11092134	A	T	0
chrX	11092135	T	A	-1.19209e-07
chrX	11092135	T	C	-5.96046e-08
chrX	11092135	T	G	5.96046e-08
chrX	11092136	A	C	0
chrX	11092136	A	G	-5.96046e-08
chrX	11092136	A	T	-5.96046e-08
chrX	11092137	T	A	0
chrX	11092137	T	C	-5.96046e-08
chrX	11092137	T	G	0
chrX	11092138	T	A	0
chrX	11092138	T	C	0
chrX	11092138	T	G	5.96046e-08
chrX	11092139	T	A	0
chrX	11092139	T	C	0
chrX	11092139	T	G	0
chrX	11092140	T	A	0
chrX	11092140	T	C	0
chrX	11092140	T	G	-5.96046e-08
chrX	11092141	A	C	5.96046e-08
chrX	11092141	A	G	-5.96046e-08
chrX	11092141	A	T	-5.96046e-08
chrX	11092142	T	A	5.96046e-08
chrX	11092142	T	C	5.96046e-08
chrX	11092142	T	G	5.96046e-08
chrX	11092143	G	A	0
chrX	11092143	G	C	-5.96046e-08
chrX	11092143	G	T	0
chrX	11092144	A	C	1.19209e-07
chrX	11092144	A	G	1.19209e-07
chrX	11092144	A	T	1.19209e-07
chrX	11092145	T	A	-5.96046e-08
chrX	11092145	T	C	0
chrX	11092145	T	G	0
chrX	11092146	A	C	1.19209e-07
chrX	11092146	A	G	5.96046e-08
chrX	11092146	A	T	0
chrX	11092147	C	A	-1.78814e-07
chrX	11092147	C	G	0
chrX	11092147	C	T	-5.96046e-08
chrX	11092148	A	C	1.19209e-07
chrX	11092148	A	G	5.96046e-08
chrX	11092148	A	T	1.19209e-07
chrX	11092149	A	C	1.19209e-07
chrX	11092149	A	G	1.19209e-07
chrX	11092149	A	T	1.78814e-07
chrX	11092150	A	C	2.38419e-07
chrX	11092150	A	G	1.78814e-07
chrX	11092150	A	T	1.78814e-07
chrX	11092151	A	C	1.19209e-07
chrX	11092151	A	G	1.78814e-07
chrX	11092151	A	T	1.78814e-07
chrX	11092152	A	C	1.78814e-07
chrX	11092152	A	G	2.38419e-07
chrX	11092152	A	T	1.19209e-07
chrX	11092153	A	C	1.19209e-07
chrX	11092153	A	G	1.78814e-07
chrX	11092153	A	T	1.19209e-07
chrX	11092154	T	A	-5.96046e-08
chrX	11092154	T	C	5.96046e-08
chrX	11092154	T	G	5.96046e-08
chrX	11092155	T	A	-5.96046e-08
chrX	11092155	T	C	5.96046e-08
chrX	11092155	T	G	5.96046e-08
chrX	11092156	G	A	-1.19209e-07
chrX	11092156	G	C	-1.78814e-07
chrX	11092156	G	T	0
chrX	11092157	C	A	-2.38419e-07
chrX	11092157	C	G	-1.19209e-07
chrX	11092157	C	T	-5.96046e-08
chrX	11092158	G	A	-5.96046e-08
chrX	11092158	G	C	5.96046e-08
chrX	11092158	G	T	5.96046e-08
chrX	11092159	T	A	0
chrX	11092159	T	C	-2.98023e-07
chrX	11092159	T	G	-5.96046e-08
chrX	11092160	A	C	-1.78814e-07
chrX	11092160	A	G	-5.96046e-08
chrX	11092160	A	T	-5.96046e-08
chrX	11092161	A	C	-1.78814e-07
chrX	11092161	A	G	-1.78814e-07
chrX	11092161	A	T	-5.96046e-08
chrX	11092162	T	A	-1.19209e-07
chrX	11092162	T	C	0
chrX	11092162	T	G	-1.19209e-07
chrX	11092163	G	A	-5.96046e-08
chrX	11092163	G	C	1.19209e-07
chrX	11092163	G	T	5.96046e-08
chrX	11092164	G	A	-2.38419e-07
chrX	11092164	G	C	5.96046e-08
chrX	11092164	G	T	-5.96046e-08
chrX	11092165	T	A	5.96046e-08
chrX	11092165	T	C	1.19209e-07
chrX	11092165	T	G	0
chrX	11092166	C	A	5.96046e-08
chrX	11092166	C	G	0
chrX	11092166	C	T	5.96046e-08
chrX	11092167	A	C	2.38419e-07
chrX	11092167	A	G	2.38419e-07
chrX	11092167	A	T	0
chrX	11092168	A	C	1.78814e-07
chrX	11092168	A	G	-5.96046e-08
chrX	11092168	A	T	0
chrX	11092169	A	C	0
chrX	11092169	A	G	1.19209e-07
chrX	11092169	A	T	-5.96046e-08
chrX	11092170	G	A	1.19209e-07
chrX	11092170	G	C	2.38419e-07
chrX	11092170	G	T	2.38419e-07
chrX	11092171	T	A	-1.19209e-07
chrX	11092171	T	C	0
chrX	11092171	T	G	0
chrX	11092172	G	A	1.19209e-07
chrX	11092172	G	C	3.57628e-07
chrX	11092172	G	T	3.57628e-07
chrX	11092173	A	C	4.76837e-07
chrX	11092173	A	G	3.57628e-07
chrX	11092173	A	T	2.38419e-07
chrX	11092174	G	A	-5.96046e-08
chrX	11092174	G	C	1.19209e-07
chrX	11092174	G	T	-1.19209e-07
chrX	11092175	A	C	4.76837e-07
chrX	11092175	A	G	3.57628e-07
chrX	11092175	A	T	2.38419e-07
chrX	11092176	A	C	1.19209e-07
chrX	11092176	A	G	-1.19209e-07
chrX	11092176	A	T	-5.96046e-08
chrX	11092177	T	A	-1.19209e-07
chrX	11092177	T	C	1.19209e-07
chrX	11092177	T	G	1.19209e-07
chrX	11092178	T	A	1.19209e-07
chrX	11092178	T	C	2.38419e-07
chrX	11092178	T	G	4.76837e-07
chrX	11092179	G	A	3.57628e-07
chrX	11092179	G	C	1.19209e-07
chrX	11092179	G	T	1.78814e-07
chrX	11092180	A	C	4.76837e-07
chrX	11092180	A	G	2.38419e-07
chrX	11092180	A	T	-2.98023e-07
chrX	11092181	T	A	3.57628e-07
chrX	11092181	T	C	2.38419e-07
chrX	11092181	T	G	3.57628e-07
chrX	11092182	A	C	1.19209e-07
chrX	11092182	A	G	-5.96046e-08
chrX	11092182	A	T	3.57628e-07
chrX	11092183	T	A	1.19209e-07
chrX	11092183	T	C	3.57628e-07
chrX	11092183	T	G	3.57628e-07
chrX	11092184	C	A	1.19209e-07
chrX	11092184	C	G	1.19209e-07
chrX	11092184	C	T	-1.78814e-07
chrX	11092185	A	C	4.76837e-07
chrX	11092185	A	G	2.38419e-07
chrX	11092185	A	T	3.57628e-07
chrX	11092186	T	A	-5.96046e-08
chrX	11092186	T	C	2.38419e-07
chrX	11092186	T	G	2.38419e-07
chrX	11092187	C	A	5.96046e-08
chrX	11092187	C	G	5.96046e-08
chrX	11092187	C	T	1.19209e-07
chrX	11092188	A	C	5.96046e-08
chrX	11092188	A	G	1.19209e-07
chrX	11092188	A	T	1.19209e-07
chrX	11092189	G	A	-2.38419e-07
chrX	11092189	G	C	-1.78814e-07
chrX	11092189	G	T	-1.78814e-07
chrX	11092190	A	C	1.19209e-07
chrX	11092190	A	G	1.19209e-07
chrX	11092190	A	T	-1.19209e-07
chrX	11092191	A	C	-2.98023e-07
chrX	11092191	A	G	-4.17233e-07
chrX	11092191	A	T	-1.19209e-07
chrX	11092192	T	A	-4.17233e-07
chrX	11092192	T	C	-4.17233e-07
chrX	11092192	T	G	1.19209e-07
chrX	11092193	A	C	0
chrX	11092193	A	G	-1.78814e-07
chrX	11092193	A	T	2.98023e-07
chrX	11092194	A	C	5.96046e-07
chrX	11092194	A	G	3.57628e-07
chrX	11092194	A	T	1.78814e-07
chrX	11092195	T	A	0
chrX	11092195	T	C	1.78814e-07
chrX	11092195	T	G	4.76837e-07
chrX	11092196	G	A	-2.38419e-07
chrX	11092196	G	C	-4.76837e-07
chrX	11092196	G	T	-1.19209e-07
chrX	11092197	A	C	4.76837e-07
chrX	11092197	A	G	3.57628e-07
chrX	11092197	A	T	5.96046e-08
chrX	11092198	A	C	5.96046e-07
chrX	11092198	A	G	4.76837e-07
chrX	11092198	A	T	-5.96046e-08
chrX	11092199	T	A	-2.38419e-07
chrX	11092199	T	C	4.17233e-07
chrX	11092199	T	G	1.78814e-07
chrX	11092200	A	C	0
chrX	11092200	A	G	1.78814e-07
chrX	11092200	A	T	3.57628e-07
chrX	11092201	A	C	1.78814e-07
chrX	11092201	A	G	1.19209e-07
chrX	11092201	A	T	3.57628e-07
chrX	11092202	A	C	5.96046e-08
chrX	11092202	A	G	0
chrX	11092202	A	T	2.38419e-07
chrX	11092203	A	C	2.98023e-07
chrX	11092203	A	G	4.17233e-07
chrX	11092203	A	T	4.76837e-07
chrX	11092204	A	C	1.78814e-07
chrX	11092204	A	G	2.38419e-07
chrX	11092204	A	T	3.57628e-07
chrX	11092205	A	C	3.57628e-07
chrX	11092205	A	G	5.96046e-08
chrX	11092205	A	T	3.57628e-07
chrX	11092206	T	A	-2.98023e-07
chrX	11092206	T	C	-4.17233e-07
chrX	11092206	T	G	0
chrX	11092207	A	C	5.96046e-08
chrX	11092207	A	G	1.78814e-07
chrX	11092207	A	T	1.19209e-07
chrX	11092208	A	C	-5.96046e-08
chrX	11092208	A	G	-1.19209e-07
chrX	11092208	A	T	3.57628e-07
chrX	11092209	T	A	-3.57628e-07
chrX	11092209	T	C	-7.7486e-07
chrX	11092209	T	G	-2.98023e-07
chrX	11092210	T	A	-4.76837e-07
chrX	11092210	T	C	0
chrX	11092210	T	G	-3.57628e-07
chrX	11092211	G	A	-4.17233e-07
chrX	11092211	G	C	-1.78814e-07
chrX	11092211	G	T	2.38419e-07
chrX	11092212	C	A	2.38419e-07
chrX	11092212	C	G	3.57628e-07
chrX	11092212	C	T	5.96046e-08
chrX	11092213	A	C	-1.13249e-06
chrX	11092213	A	G	-8.9407e-07
chrX	11092213	A	T	-2.38419e-07
chrX	11092214	T	A	2.38419e-07
chrX	11092214	T	C	-1.19209e-07
chrX	11092214	T	G	4.76837e-07
chrX	11092215	G	A	-3.57628e-07
chrX	11092215	G	C	-2.98023e-07
chrX	11092215	G	T	-1.78814e-07
chrX	11092216	C	A	-1.07288e-06
chrX	11092216	C	G	-3.57628e-07
chrX	11092216	C	T	-3.57628e-07
chrX	11092217	T	A	-3.57628e-07
chrX	11092217	T	C	-5.36442e-07
chrX	11092217	T	G	-4.17233e-07
chrX	11092218	A	C	-4.17233e-07
chrX	11092218	A	G	-1.2517e-06
chrX	11092218	A	T	-5.96046e-08
chrX	11092219	A	C	-9.53674e-07
chrX	11092219	A	G	-5.36442e-07
chrX	11092219	A	T	0
chrX	11092220	T	A	-5.96046e-08
chrX	11092220	T	C	-7.15256e-07
chrX	11092220	T	G	3.57628e-07
chrX	11092221	G	A	-1.19209e-07
chrX	11092221	G	C	-1.78814e-07
chrX	11092221	G	T	4.76837e-07
chrX	11092222	T	A	-4.76837e-07
chrX	11092222	T	C	-1.78814e-07
chrX	11092222	T	G	7.15256e-07
chrX	11092223	G	A	-4.76837e-07
chrX	11092223	G	C	-2.38419e-07
chrX	11092223	G	T	-5.96046e-08
chrX	11092224	A	C	2.98023e-07
chrX	11092224	A	G	3.57628e-07
chrX	11092224	A	T	-2.38419e-07
chrX	11092225	A	C	-8.9407e-07
chrX	11092225	A	G	0
chrX	11092225	A	T	-8.9407e-07
chrX	11092226	A	C	-1.78814e-07
chrX	11092226	A	G	-2.38419e-07
chrX	11092226	A	T	4.76837e-07
chrX	11092227	T	A	0
chrX	11092227	T	C	-1.19209e-07
chrX	11092227	T	G	-1.19209e-07
chrX	11092228	G	A	0
chrX	11092228	G	C	-1.78814e-07
chrX	11092228	G	T	5.96046e-07
chrX	11092229	T	A	-1.72853e-06
chrX	11092229	T	C	2.38419e-07
chrX	11092229	T	G	-5.36442e-07
chrX	11092230	T	A	-9.53674e-07
chrX	11092230	T	C	-8.9407e-07
chrX	11092230	T	G	-6.55651e-07
chrX	11092231	T	A	-5.96046e-07
chrX	11092231	T	C	-7.7486e-07
chrX	11092231	T	G	-8.34465e-07
chrX	11092232	T	A	-8.9407e-07
chrX	11092232	T	C	-2.38419e-07
chrX	11092232	T	G	-1.19209e-07
chrX	11092233	G	A	4.76837e-07
chrX	11092233	G	C	5.96046e-07
chrX	11092233	G	T	7.15256e-07
chrX	11092234	A	C	4.76837e-07
chrX	11092234	A	G	-4.17233e-07
chrX	11092234	A	T	1.78814e-07
chrX	11092235	T	A	-3.57628e-07
chrX	11092235	T	C	-5.36442e-07
chrX	11092235	T	G	-5.96046e-07
chrX	11092236	A	C	8.34465e-07
chrX	11092236	A	G	5.96046e-08
chrX	11092236	A	T	-2.38419e-07
chrX	11092237	C	A	-1.72853e-06
chrX	11092237	C	G	-8.9407e-07
chrX	11092237	C	T	-1.37091e-06
chrX	11092238	T	A	-3.57628e-07
chrX	11092238	T	C	-2.38419e-07
chrX	11092238	T	G	-1.54972e-06
chrX	11092239	T	A	2.38419e-07
chrX	11092239	T	C	-1.19209e-07
chrX	11092239	T	G	3.57628e-07
chrX	11092240	G	A	-4.76837e-07
chrX	11092240	G	C	7.15256e-07
chrX	11092240	G	T	1.19209e-07
chrX	11092241	T	A	3.57628e-07
chrX	11092241	T	C	1.07288e-06
chrX	11092241	T	G	0
chrX	11092242	T	A	-5.96046e-07
chrX	11092242	T	C	8.34465e-07
chrX	11092242	T	G	-7.7486e-07
chrX	11092243	T	A	-6.55651e-07
chrX	11092243	T	C	2.38419e-07
chrX	11092243	T	G	-5.96046e-08
chrX	11092244	C	A	-5.36442e-07
chrX	11092244	C	G	-1.19209e-07
chrX	11092244	C	T	2.38419e-07
chrX	11092245	A	C	4.76837e-07
chrX	11092245	A	G	-4.17233e-07
chrX	11092245	A	T	8.34465e-07
chrX	11092246	A	C	0
chrX	11092246	A	G	8.34465e-07
chrX	11092246	A	T	5.96046e-08
chrX	11092247	A	C	0
chrX	11092247	A	G	6.55651e-07
chrX	11092247	A	T	-4.76837e-07
chrX	11092248	A	C	7.15256e-07
chrX	11092248	A	G	-1.19209e-07
chrX	11092248	A	T	2.38419e-07
chrX	11092249	T	A	-5.96046e-07
chrX	11092249	T	C	5.96046e-08
chrX	11092249	T	G	-7.15256e-07
chrX	11092250	A	C	8.34465e-07
chrX	11092250	A	G	-2.38419e-07
chrX	11092250	A	T	5.96046e-07
chrX	11092251	T	A	-9.53674e-07
chrX	11092251	T	C	-2.98023e-07
chrX	11092251	T	G	-7.7486e-07
chrX	11092252	A	C	7.15256e-07
chrX	11092252	A	G	8.34465e-07
chrX	11092252	A	T	7.15256e-07
chrX	11092253	C	A	1.19209e-07
chrX	11092253	C	G	3.57628e-07
chrX	11092253	C	T	5.96046e-07
chrX	11092254	T	A	1.78814e-07
chrX	11092254	T	C	-2.38419e-07
chrX	11092254	T	G	0
chrX	11092255	G	A	-2.98023e-07
chrX	11092255	G	C	-1.07288e-06
chrX	11092255	G	T	-2.98023e-07
chrX	11092256	G	A	-1.07288e-06
chrX	11092256	G	C	-1.19209e-07
chrX	11092256	G	T	-1.19209e-07
chrX	11092257	T	A	-2.98023e-07
chrX	11092257	T	C	1.19209e-06
chrX	11092257	T	G	4.17233e-07
chrX	11092258	T	A	-4.17233e-07
chrX	11092258	T	C	-1.13249e-06
chrX	11092258	T	G	-1.13249e-06
chrX	11092259	T	A	-5.96046e-08
chrX	11092259	T	C	-4.76837e-07
chrX	11092259	T	G	-8.34465e-07
chrX	11092260	A	C	-1.19209e-07
chrX	11092260	A	G	5.96046e-08
chrX	11092260	A	T	-6.55651e-07
chrX	11092261	T	A	1.78814e-07
chrX	11092261	T	C	-1.54972e-06
chrX	11092261	T	G	-1.37091e-06
chrX	11092262	T	A	-1.78814e-07
chrX	11092262	T	C	3.57628e-07
chrX	11092262	T	G	1.19209e-06
chrX	11092263	C	A	-1.2517e-06
chrX	11092263	C	G	-1.60933e-06
chrX	11092263	C	T	-1.54972e-06
chrX	11092264	T	A	-8.34465e-07
chrX	11092264	T	C	8.34465e-07
chrX	11092264	T	G	1.07288e-06
chrX	11092265	T	A	0
chrX	11092265	T	C	3.57628e-07
chrX	11092265	T	G	-1.78814e-07
chrX	11092266	A	C	1.3113e-06
chrX	11092266	A	G	1.54972e-06
chrX	11092266	A	T	0
chrX	11092267	T	A	-1.19209e-07
chrX	11092267	T	C	-5.96046e-08
chrX	11092267	T	G	2.98023e-07
chrX	11092268	A	C	1.90735e-06
chrX	11092268	A	G	1.54972e-06
chrX	11092268	A	T	9.53674e-07
chrX	11092269	C	A	-1.01328e-06
chrX	11092269	C	G	1.19209e-07
chrX	11092269	C	T	-4.17233e-07
chrX	11092270	A	C	7.15256e-07
chrX	11092270	A	G	1.19209e-06
chrX	11092270	A	T	1.66893e-06
chrX	11092271	C	A	3.57628e-07
chrX	11092271	C	G	4.76837e-07
chrX	11092271	C	T	1.07288e-06
chrX	11092272	A	C	-1.19209e-07
chrX	11092272	A	G	2.38419e-07
chrX	11092272	A	T	-5.96046e-07
chrX	11092273	C	A	1.19209e-07
chrX	11092273	C	G	-1.07288e-06
chrX	11092273	C	T	-1.78814e-07
chrX	11092274	G	A	-9.53674e-07
chrX	11092274	G	C	-7.7486e-07
chrX	11092274	G	T	-5.36442e-07
chrX	11092275	G	A	4.76837e-07
chrX	11092275	G	C	-2.38419e-07
chrX	11092275	G	T	-2.38419e-07
chrX	11092276	T	A	2.38419e-07
chrX	11092276	T	C	1.19209e-07
chrX	11092276	T	G	-3.57628e-07
chrX	11092277	T	A	8.34465e-07
chrX	11092277	T	C	9.53674e-07
chrX	11092277	T	G	2.38419e-07
chrX	11092278	A	C	1.90735e-06
chrX	11092278	A	G	1.3113e-06
chrX	11092278	A	T	3.57628e-07
chrX	11092279	T	A	2.38419e-07
chrX	11092279	T	C	1.19209e-06
chrX	11092279	T	G	1.19209e-06
chrX	11092280	A	C	8.34465e-07
chrX	11092280	A	G	8.34465e-07
chrX	11092280	A	T	-1.19209e-07
chrX	11092281	T	A	-4.76837e-07
chrX	11092281	T	C	-2.98023e-07
chrX	11092281	T	G	3.57628e-07
chrX	11092282	A	C	5.96046e-08
chrX	11092282	A	G	1.19209e-07
chrX	11092282	A	T	4.76837e-07
chrX	11092283	A	C	8.34465e-07
chrX	11092283	A	G	1.3113e-06
chrX	11092283	A	T	5.96046e-08
chrX	11092284	C	A	-2.20537e-06
chrX	11092284	C	G	-2.6226e-06
chrX	11092284	C	T	-1.19209e-06
chrX	11092285	T	A	-1.13249e-06
chrX	11092285	T	C	-8.34465e-07
chrX	11092285	T	G	-2.02656e-06
chrX	11092286	A	C	1.66893e-06
chrX	11092286	A	G	-5.36442e-07
chrX	11092286	A	T	2.5034e-06
chrX	11092287	C	A	4.76837e-07
chrX	11092287	C	G	-2.14577e-06
chrX	11092287	C	T	4.76837e-07
chrX	11092288	A	C	1.90735e-06
chrX	11092288	A	G	-1.54972e-06
chrX	11092288	A	T	1.78814e-06
chrX	11092289	G	A	2.14577e-06
chrX	11092289	G	C	9.53674e-07
chrX	11092289	G	T	1.3113e-06
chrX	11092290	G	A	2.38419e-07
chrX	11092290	G	C	2.14577e-06
chrX	11092290	G	T	2.02656e-06
chrX	11092291	G	A	8.34465e-07
chrX	11092291	G	C	2.38419e-06
chrX	11092291	G	T	1.43051e-06
chrX	11092292	T	A	-8.34465e-07
chrX	11092292	T	C	9.53674e-07
chrX	11092292	T	G	-2.26498e-06
chrX	11092293	G	A	9.53674e-07
chrX	11092293	G	C	9.53674e-07
chrX	11092293	G	T	1.07288e-06
chrX	11092294	A	C	9.53674e-07
chrX	11092294	A	G	-1.78814e-07
chrX	11092294	A	T	-1.19209e-07
chrX	11092295	C	A	0
chrX	11092295	C	G	2.38419e-07
chrX	11092295	C	T	2.38419e-07
chrX	11092296	A	C	2.14577e-06
chrX	11092296	A	G	1.07288e-06
chrX	11092296	A	T	1.43051e-06
chrX	11092297	A	C	2.38419e-06
chrX	11092297	A	G	1.3113e-06
chrX	11092297	A	T	1.3113e-06
chrX	11092298	T	A	0
chrX	11092298	T	C	3.45707e-06
chrX	11092298	T	G	8.34465e-07
chrX	11092299	T	A	-8.34465e-07
chrX	11092299	T	C	-1.2517e-06
chrX	11092299	T	G	-4.76837e-07
chrX	11092300	A	C	9.53674e-07
chrX	11092300	A	G	-5.36442e-07
chrX	11092300	A	T	9.53674e-07
chrX	11092301	A	C	3.93391e-06
chrX	11092301	A	G	5.96046e-07
chrX	11092301	A	T	1.90735e-06
chrX	11092302	T	A	-4.76837e-07
chrX	11092302	T	C	2.6226e-06
chrX	11092302	T	G	-5.96046e-07
chrX	11092303	T	A	-1.72853e-06
chrX	11092303	T	C	5.96046e-08
chrX	11092303	T	G	-1.01328e-06
chrX	11092304	A	C	2.5034e-06
chrX	11092304	A	G	-2.98023e-07
chrX	11092304	A	T	7.15256e-07
chrX	11092305	T	A	-1.60933e-06
chrX	11092305	T	C	1.90735e-06
chrX	11092305	T	G	-2.92063e-06
chrX	11092306	G	A	1.19209e-07
chrX	11092306	G	C	1.54972e-06
chrX	11092306	G	T	1.07288e-06
chrX	11092307	G	A	-1.43051e-06
chrX	11092307	G	C	1.3113e-06
chrX	11092307	G	T	0
chrX	11092308	G	A	7.15256e-07
chrX	11092308	G	C	5.96046e-07
chrX	11092308	G	T	1.19209e-06
chrX	11092309	A	C	-1.78814e-07
chrX	11092309	A	G	-1.54972e-06
chrX	11092309	A	T	2.38419e-07
chrX	11092310	A	C	1.07288e-06
chrX	11092310	A	G	4.17233e-07
chrX	11092310	A	T	8.34465e-07
chrX	11092311	G	A	8.34465e-07
chrX	11092311	G	C	2.38419e-06
chrX	11092311	G	T	1.43051e-06
chrX	11092312	T	A	-2.38419e-07
chrX	11092312	T	C	1.66893e-06
chrX	11092312	T	G	4.76837e-07
chrX	11092313	C	A	-2.02656e-06
chrX	11092313	C	G	-2.14577e-06
chrX	11092313	C	T	2.38419e-07
chrX	11092314	G	A	-1.90735e-06
chrX	11092314	G	C	2.98023e-06
chrX	11092314	G	T	7.15256e-07
chrX	11092315	T	A	2.38419e-07
chrX	11092315	T	C	3.21865e-06
chrX	11092315	T	G	-8.9407e-07
chrX	11092316	A	C	3.93391e-06
chrX	11092316	A	G	8.9407e-07
chrX	11092316	A	T	4.76837e-07
chrX	11092317	A	C	1.66893e-06
chrX	11092317	A	G	1.90735e-06
chrX	11092317	A	T	3.57628e-07
chrX	11092318	A	C	3.8147e-06
chrX	11092318	A	G	2.80142e-06
chrX	11092318	A	T	1.60933e-06
chrX	11092319	A	C	5.84126e-06
chrX	11092319	A	G	8.9407e-07
chrX	11092319	A	T	2.74181e-06
chrX	11092320	A	C	2.98023e-06
chrX	11092320	A	G	1.90735e-06
chrX	11092320	A	T	9.53674e-07
chrX	11092321	C	A	2.38419e-07
chrX	11092321	C	G	-1.84774e-06
chrX	11092321	C	T	3.57628e-07
chrX	11092322	G	A	-4.17233e-07
chrX	11092322	G	C	1.54972e-06
chrX	11092322	G	T	1.90735e-06
chrX	11092323	C	A	-1.72853e-06
chrX	11092323	C	G	-8.34465e-07
chrX	11092323	C	T	1.19209e-07
chrX	11092324	C	A	-2.32458e-06
chrX	11092324	C	G	-5.96046e-07
chrX	11092324	C	T	-1.19209e-07
chrX	11092325	A	C	2.5034e-06
chrX	11092325	A	G	1.19209e-06
chrX	11092325	A	T	1.78814e-06
chrX	11092326	T	A	1.54972e-06
chrX	11092326	T	C	2.6226e-06
chrX	11092326	T	G	1.66893e-06
chrX	11092327	A	C	3.8147e-06
chrX	11092327	A	G	1.54972e-06
chrX	11092327	A	T	1.07288e-06
chrX	11092328	A	C	1.54972e-06
chrX	11092328	A	G	1.66893e-06
chrX	11092328	A	T	5.96046e-07
chrX	11092329	A	C	3.09944e-06
chrX	11092329	A	G	2.74181e-06
chrX	11092329	A	T	1.07288e-06
chrX	11092330	A	C	2.02656e-06
chrX	11092330	A	G	1.78814e-06
chrX	11092330	A	T	1.54972e-06
chrX	11092331	A	C	1.07288e-06
chrX	11092331	A	G	2.02656e-06
chrX	11092331	A	T	7.15256e-07
chrX	11092332	C	A	-1.19209e-06
chrX	11092332	C	G	-5.96046e-07
chrX	11092332	C	T	-1.2517e-06
chrX	11092333	G	A	-4.17233e-07
chrX	11092333	G	C	1.19209e-06
chrX	11092333	G	T	1.3113e-06
chrX	11092334	T	A	-1.72853e-06
chrX	11092334	T	C	3.57628e-07
chrX	11092334	T	G	-8.9407e-07
chrX	11092335	T	A	0
chrX	11092335	T	C	1.90735e-06
chrX	11092335	T	G	5.96046e-07
chrX	11092336	G	A	-7.7486e-07
chrX	11092336	G	C	1.19209e-06
chrX	11092336	G	T	-4.76837e-07
chrX	11092337	C	A	-1.43051e-06
chrX	11092337	C	G	-2.02656e-06
chrX	11092337	C	T	-1.66893e-06
chrX	11092338	A	C	2.02656e-06
chrX	11092338	A	G	1.43051e-06
chrX	11092338	A	T	-7.15256e-07
chrX	11092339	A	C	5.96046e-07
chrX	11092339	A	G	-8.34465e-07
chrX	11092339	A	T	-4.17233e-07
chrX	11092340	C	A	-1.72853e-06
chrX	11092340	C	G	0
chrX	11092340	C	T	0
chrX	11092341	T	A	-2.32458e-06
chrX	11092341	T	C	-1.78814e-07
chrX	11092341	T	G	-4.76837e-07
chrX	11092342	T	A	-1.3113e-06
chrX	11092342	T	C	-2.6226e-06
chrX	11092342	T	G	-2.68221e-06
chrX	11092343	G	A	-3.03984e-06
chrX	11092343	G	C	1.19209e-07
chrX	11092343	G	T	-1.07288e-06
chrX	11092344	A	C	-1.84774e-06
chrX	11092344	A	G	-2.5034e-06
chrX	11092344	A	T	-1.60933e-06
chrX	11092345	G	A	-3.15905e-06
chrX	11092345	G	C	-2.5034e-06
chrX	11092345	G	T	-2.92063e-06
chrX	11092346	A	C	1.19209e-07
chrX	11092346	A	G	2.74181e-06
chrX	11092346	A	T	-1.01328e-06
chrX	11092347	T	A	-5.96046e-07
chrX	11092347	T	C	-1.3113e-06
chrX	11092347	T	G	-5.96046e-07
chrX	11092348	A	C	2.38419e-07
chrX	11092348	A	G	-5.96046e-08
chrX	11092348	A	T	-1.43051e-06
chrX	11092349	A	C	1.19209e-06
chrX	11092349	A	G	3.21865e-06
chrX	11092349	A	T	0
chrX	11092350	T	A	2.38419e-07
chrX	11092350	T	C	1.43051e-06
chrX	11092350	T	G	1.54972e-06
chrX	11092351	G	A	-1.54972e-06
chrX	11092351	G	C	1.19209e-06
chrX	11092351	G	T	1.66893e-06
chrX	11092352	T	A	-3.03984e-06
chrX	11092352	T	C	2.98023e-06
chrX	11092352	T	G	2.98023e-07
chrX	11092353	T	A	-1.19209e-07
chrX	11092353	T	C	1.90735e-06
chrX	11092353	T	G	3.45707e-06
chrX	11092354	A	C	7.7486e-06
chrX	11092354	A	G	4.05312e-06
chrX	11092354	A	T	4.52995e-06
chrX	11092355	C	A	2.02656e-06
chrX	11092355	C	G	3.45707e-06
chrX	11092355	C	T	-5.96046e-07
chrX	11092356	A	C	3.57628e-06
chrX	11092356	A	G	2.74181e-06
chrX	11092356	A	T	-7.15256e-07
chrX	11092357	A	C	-2.38419e-07
chrX	11092357	A	G	-2.68221e-06
chrX	11092357	A	T	-3.27826e-06
chrX	11092358	A	C	1.78814e-06
chrX	11092358	A	G	2.02656e-06
chrX	11092358	A	T	1.19209e-07
chrX	11092359	A	C	2.14577e-06
chrX	11092359	A	G	3.57628e-07
chrX	11092359	A	T	7.15256e-07
chrX	11092360	T	A	-5.96046e-07
chrX	11092360	T	C	5.96046e-07
chrX	11092360	T	G	-9.53674e-07
chrX	11092361	T	A	-1.78814e-06
chrX	11092361	T	C	4.05312e-06
chrX	11092361	T	G	-2.38419e-07
chrX	11092362	T	A	-2.68221e-06
chrX	11092362	T	C	3.33786e-06
chrX	11092362	T	G	4.17233e-07
chrX	11092363	T	A	-3.63588e-06
chrX	11092363	T	C	1.66893e-06
chrX	11092363	T	G	4.76837e-07
chrX	11092364	T	A	-2.44379e-06
chrX	11092364	T	C	2.6226e-06
chrX	11092364	T	G	2.26498e-06
chrX	11092365	A	C	9.41753e-06
chrX	11092365	A	G	4.52995e-06
chrX	11092365	A	T	3.57628e-06
chrX	11092366	A	C	5.36442e-06
chrX	11092366	A	G	1.66893e-06
chrX	11092366	A	T	3.45707e-06
chrX	11092367	C	A	-3.69549e-06
chrX	11092367	C	G	3.57628e-07
chrX	11092367	C	T	-2.5034e-06
chrX	11092368	T	A	-1.01328e-06
chrX	11092368	T	C	3.09944e-06
chrX	11092368	T	G	9.53674e-07
chrX	11092369	G	A	-5.36442e-07
chrX	11092369	G	C	3.45707e-06
chrX	11092369	G	T	1.54972e-06
chrX	11092370	C	A	-4.76837e-06
chrX	11092370	C	G	-2.5034e-06
chrX	11092370	C	T	3.57628e-07
chrX	11092371	A	C	1.78814e-06
chrX	11092371	A	G	1.3113e-06
chrX	11092371	A	T	1.54972e-06
chrX	11092372	A	C	6.67572e-06
chrX	11092372	A	G	2.74181e-06
chrX	11092372	A	T	3.69549e-06
chrX	11092373	A	C	7.62939e-06
chrX	11092373	A	G	7.39098e-06
chrX	11092373	A	T	5.126e-06
chrX	11092374	T	A	-8.34465e-07
chrX	11092374	T	C	4.41074e-06
chrX	11092374	T	G	4.29153e-06
chrX	11092375	T	A	-2.38419e-06
chrX	11092375	T	C	2.74181e-06
chrX	11092375	T	G	2.38419e-07
chrX	11092376	A	C	2.74181e-06
chrX	11092376	A	G	2.26498e-06
chrX	11092376	A	T	2.74181e-06
chrX	11092377	A	C	5.00679e-06
chrX	11092377	A	G	2.74181e-06
chrX	11092377	A	T	2.98023e-06
chrX	11092378	G	A	1.43051e-06
chrX	11092378	G	C	2.98023e-06
chrX	11092378	G	T	-5.96046e-07
chrX	11092379	A	C	4.64916e-06
chrX	11092379	A	G	2.6226e-06
chrX	11092379	A	T	3.45707e-06
chrX	11092380	A	C	3.8147e-06
chrX	11092380	A	G	2.86102e-06
chrX	11092380	A	T	2.38419e-06
chrX	11092381	A	C	2.44379e-06
chrX	11092381	A	G	2.563e-06
chrX	11092381	A	T	2.5034e-06
chrX	11092382	A	C	3.33786e-06
chrX	11092382	A	G	3.93391e-06
chrX	11092382	A	T	1.54972e-06
chrX	11092383	T	A	-1.2517e-06
chrX	11092383	T	C	-6.55651e-07
chrX	11092383	T	G	1.2517e-06
chrX	11092384	A	C	8.9407e-07
chrX	11092384	A	G	1.72853e-06
chrX	11092384	A	T	4.05312e-06
chrX	11092385	T	A	-3.09944e-06
chrX	11092385	T	C	-6.55651e-07
chrX	11092385	T	G	7.15256e-07
chrX	11092386	T	A	-4.17233e-06
chrX	11092386	T	C	-8.34465e-07
chrX	11092386	T	G	5.36442e-07
chrX	11092387	T	A	-2.44379e-06
chrX	11092387	T	C	-2.26498e-06
chrX	11092387	T	G	1.07288e-06
chrX	11092388	C	A	-2.563e-06
chrX	11092388	C	G	7.7486e-07
chrX	11092388	C	T	3.33786e-06
chrX	11092389	T	A	4.76837e-07
chrX	11092389	T	C	1.54972e-06
chrX	11092389	T	G	1.2517e-06
chrX	11092390	G	A	-1.07288e-06
chrX	11092390	G	C	2.6226e-06
chrX	11092390	G	T	1.07288e-06
chrX	11092391	A	C	4.76837e-06
chrX	11092391	A	G	3.57628e-06
chrX	11092391	A	T	2.98023e-06
chrX	11092392	T	A	1.19209e-07
chrX	11092392	T	C	3.93391e-06
chrX	11092392	T	G	2.86102e-06
chrX	11092393	T	A	-1.3113e-06
chrX	11092393	T	C	1.19209e-06
chrX	11092393	T	G	-5.96046e-08
chrX	11092394	A	C	-8.34465e-07
chrX	11092394	A	G	1.19209e-06
chrX	11092394	A	T	4.88758e-06
chrX	11092395	T	A	-2.26498e-06
chrX	11092395	T	C	-5.96046e-08
chrX	11092395	T	G	-1.01328e-06
chrX	11092396	A	C	1.37091e-06
chrX	11092396	A	G	2.38419e-07
chrX	11092396	A	T	1.3113e-06
chrX	11092397	T	A	-1.43051e-06
chrX	11092397	T	C	5.96046e-08
chrX	11092397	T	G	-4.76837e-07
chrX	11092398	A	C	1.84774e-06
chrX	11092398	A	G	-4.76837e-07
chrX	11092398	A	T	1.3113e-06
chrX	11092399	T	A	-1.78814e-06
chrX	11092399	T	C	4.76837e-07
chrX	11092399	T	G	5.36442e-07
chrX	11092400	T	A	-2.86102e-06
chrX	11092400	T	C	7.15256e-07
chrX	11092400	T	G	-1.37091e-06
chrX	11092401	C	A	-5.66244e-06
chrX	11092401	C	G	-3.15905e-06
chrX	11092401	C	T	9.53674e-07
chrX	11092402	T	A	-3.75509e-06
chrX	11092402	T	C	1.78814e-07
chrX	11092402	T	G	-1.13249e-06
chrX	11092403	C	A	-4.17233e-06
chrX	11092403	C	G	-2.74181e-06
chrX	11092403	C	T	-2.02656e-06
chrX	11092404	A	C	2.02656e-06
chrX	11092404	A	G	-3.45707e-06
chrX	11092404	A	T	0
chrX	11092405	A	C	4.17233e-06
chrX	11092405	A	G	1.66893e-06
chrX	11092405	A	T	0
chrX	11092406	G	A	1.90735e-06
chrX	11092406	G	C	9.53674e-07
chrX	11092406	G	T	-2.98023e-06
chrX	11092407	A	C	2.20537e-06
chrX	11092407	A	G	1.3113e-06
chrX	11092407	A	T	2.26498e-06
chrX	11092408	A	C	-3.57628e-07
chrX	11092408	A	G	-2.02656e-06
chrX	11092408	A	T	5.96046e-07
chrX	11092409	A	C	3.93391e-06
chrX	11092409	A	G	1.3113e-06
chrX	11092409	A	T	3.09944e-06
chrX	11092410	T	A	-1.84774e-06
chrX	11092410	T	C	-2.38419e-07
chrX	11092410	T	G	-1.43051e-06
chrX	11092411	G	A	-7.15256e-07
chrX	11092411	G	C	-1.78814e-07
chrX	11092411	G	T	5.84126e-06
chrX	11092412	T	A	-1.01328e-06
chrX	11092412	T	C	-5.96046e-07
chrX	11092412	T	G	-2.80142e-06
chrX	11092413	T	A	-2.38419e-07
chrX	11092413	T	C	2.14577e-06
chrX	11092413	T	G	-4.23193e-06
chrX	11092414	T	A	-1.19209e-06
chrX	11092414	T	C	-3.57628e-07
chrX	11092414	T	G	7.7486e-07
chrX	11092415	G	A	-1.2517e-06
chrX	11092415	G	C	1.90735e-06
chrX	11092415	G	T	9.53674e-07
chrX	11092416	T	A	-1.19209e-06
chrX	11092416	T	C	-5.30481e-06
chrX	11092416	T	G	-2.08616e-06
chrX	11092417	G	A	9.53674e-07
chrX	11092417	G	C	-1.84774e-06
chrX	11092417	G	T	-1.78814e-06
chrX	11092418	C	A	-2.5034e-06
chrX	11092418	C	G	-3.8147e-06
chrX	11092418	C	T	-2.80142e-06
chrX	11092419	T	A	-1.60933e-06
chrX	11092419	T	C	2.74181e-06
chrX	11092419	T	G	-5.96046e-07
chrX	11092420	T	A	1.66893e-06
chrX	11092420	T	C	-7.15256e-07
chrX	11092420	T	G	4.17233e-07
chrX	11092421	T	A	4.76837e-07
chrX	11092421	T	C	-5.30481e-06
chrX	11092421	T	G	-3.21865e-06
chrX	11092422	T	A	-1.07288e-06
chrX	11092422	T	C	-5.72205e-06
chrX	11092422	T	G	-4.94719e-06
chrX	11092423	T	A	-2.563e-06
chrX	11092423	T	C	-5.00679e-06
chrX	11092423	T	G	-5.30481e-06
chrX	11092424	T	A	-3.09944e-06
chrX	11092424	T	C	-5.72205e-06
chrX	11092424	T	G	-6.67572e-06
chrX	11092425	T	A	-3.75509e-06
chrX	11092425	T	C	-2.38419e-07
chrX	11092425	T	G	-5.96046e-06
chrX	11092426	T	A	-2.98023e-06
chrX	11092426	T	C	2.6226e-06
chrX	11092426	T	G	-3.09944e-06
chrX	11092427	T	A	-2.44379e-06
chrX	11092427	T	C	2.5034e-06
chrX	11092427	T	G	1.13249e-06
chrX	11092428	T	A	5.36442e-07
chrX	11092428	T	C	7.15256e-07
chrX	11092428	T	G	-6.55651e-07
chrX	11092429	A	C	-4.76837e-07
chrX	11092429	A	G	2.98023e-06
chrX	11092429	A	T	-1.3113e-06
chrX	11092430	C	A	-2.92063e-06
chrX	11092430	C	G	1.90735e-06
chrX	11092430	C	T	-8.16584e-06
chrX	11092431	C	A	-3.09944e-06
chrX	11092431	C	G	1.07288e-06
chrX	11092431	C	T	-1.01328e-06
chrX	11092432	A	C	5.96046e-06
chrX	11092432	A	G	2.74181e-06
chrX	11092432	A	T	1.21593e-05
chrX	11092433	A	C	9.05991e-06
chrX	11092433	A	G	6.49691e-06
chrX	11092433	A	T	4.17233e-07
chrX	11092434	C	A	-5.42402e-06
chrX	11092434	C	G	-2.6226e-06
chrX	11092434	C	T	-4.76837e-06
chrX	11092435	G	A	5.96046e-08
chrX	11092435	G	C	7.7486e-06
chrX	11092435	G	T	7.27177e-06
chrX	11092436	A	C	7.86781e-06
chrX	11092436	A	G	0
chrX	11092436	A	T	2.38419e-06
chrX	11092437	C	A	1.07288e-06
chrX	11092437	C	G	5.96046e-07
chrX	11092437	C	T	4.52995e-06
chrX	11092438	G	A	1.19209e-07
chrX	11092438	G	C	3.8147e-06
chrX	11092438	G	T	5.24521e-06
chrX	11092439	A	C	4.41074e-06
chrX	11092439	A	G	6.67572e-06
chrX	11092439	A	T	1.3113e-06
chrX	11092440	C	A	-5.06639e-06
chrX	11092440	C	G	-2.19345e-05
chrX	11092440	C	T	-9.41753e-06
chrX	11092441	A	C	5.96046e-06
chrX	11092441	A	G	1.90735e-06
chrX	11092441	A	T	2.5034e-06
chrX	11092442	G	A	4.17233e-06
chrX	11092442	G	C	-1.78814e-06
chrX	11092442	G	T	3.57628e-06
chrX	11092443	G	A	-2.86102e-06
chrX	11092443	G	C	-2.02656e-06
chrX	11092443	G	T	-2.38419e-06
chrX	11092444	C	A	1.3113e-06
chrX	11092444	C	G	4.41074e-06
chrX	11092444	C	T	3.57628e-07
chrX	11092445	C	A	2.02656e-06
chrX	11092445	C	G	-2.14577e-06
chrX	11092445	C	T	3.45707e-06
chrX	11092446	T	A	1.19209e-07
chrX	11092446	T	C	-3.57628e-07
chrX	11092446	T	G	-3.45707e-06
chrX	11092447	C	A	2.6226e-06
chrX	11092447	C	G	7.56979e-06
chrX	11092447	C	T	1.54972e-06
chrX	11092448	C	A	-1.13249e-06
chrX	11092448	C	G	-2.49147e-05
chrX	11092448	C	T	5.48363e-06
chrX	11092449	A	C	3.21865e-06
chrX	11092449	A	G	5.96046e-07
chrX	11092449	A	T	2.86102e-06
chrX	11092450	A	C	2.5034e-06
chrX	11092450	A	G	1.66893e-06
chrX	11092450	A	T	-4.76837e-07
chrX	11092451	A	C	-9.53674e-07
chrX	11092451	A	G	8.22544e-06
chrX	11092451	A	T	6.55651e-07
chrX	11092452	G	A	-4.41074e-06
chrX	11092452	G	C	8.46386e-06
chrX	11092452	G	T	1.54972e-06
chrX	11092453	T	A	-5.30481e-06
chrX	11092453	T	C	3.57628e-07
chrX	11092453	T	G	3.09944e-06
chrX	11092454	A	C	-6.79493e-06
chrX	11092454	A	G	6.07967e-06
chrX	11092454	A	T	1.19209e-07
chrX	11092455	G	A	-7.39098e-06
chrX	11092455	G	C	4.52995e-06
chrX	11092455	G	T	-6.55651e-06
chrX	11092456	A	C	8.70228e-06
chrX	11092456	A	G	8.88109e-06
chrX	11092456	A	T	8.9407e-07
chrX	11092457	T	A	-5.96046e-08
chrX	11092457	T	C	5.60284e-06
chrX	11092457	T	G	-2.12193e-05
chrX	11092458	T	A	-6.3777e-06
chrX	11092458	T	C	1.37091e-06
chrX	11092458	T	G	-7.7486e-07
chrX	11092459	G	A	1.66893e-06
chrX	11092459	G	C	2.74181e-06
chrX	11092459	G	T	-5.48363e-06
chrX	11092460	A	C	3.57628e-07
chrX	11092460	A	G	-2.563e-06
chrX	11092460	A	T	-1.3113e-06
chrX	11092461	T	A	-8.34465e-07
chrX	11092461	T	C	1.10865e-05
chrX	11092461	T	G	-1.19209e-07
chrX	11092462	T	A	2.38419e-07
chrX	11092462	T	C	1.39475e-05
chrX	11092462	T	G	-1.78814e-07
chrX	11092463	T	A	3.69549e-06
chrX	11092463	T	C	1.12057e-05
chrX	11092463	T	G	-4.47035e-06
chrX	11092464	C	A	2.02656e-06
chrX	11092464	C	G	-2.86102e-06
chrX	11092464	C	T	6.55651e-07
chrX	11092465	A	C	8.10623e-06
chrX	11092465	A	G	1.09673e-05
chrX	11092465	A	T	1.78814e-06
chrX	11092466	C	A	6.19888e-06
chrX	11092466	C	G	3.21865e-06
chrX	11092466	C	T	1.66893e-06
chrX	11092467	A	C	7.03335e-06
chrX	11092467	A	G	2.98023e-07
chrX	11092467	A	T	1.90735e-06
chrX	11092468	G	A	2.86102e-06
chrX	11092468	G	C	-5.126e-06
chrX	11092468	G	T	4.35114e-06
chrX	11092469	A	C	-4.17233e-07
chrX	11092469	A	G	-5.96046e-06
chrX	11092469	A	T	-7.15256e-06
chrX	11092470	G	A	5.84126e-06
chrX	11092470	G	C	-3.33786e-06
chrX	11092470	G	T	6.55651e-07
chrX	11092471	C	A	-4.81606e-05
chrX	11092471	C	G	-4.52995e-06
chrX	11092471	C	T	-1.72853e-06
chrX	11092472	C	A	2.5034e-06
chrX	11092472	C	G	-1.10865e-05
chrX	11092472	C	T	8.70228e-06
chrX	11092473	G	A	4.17233e-06
chrX	11092473	G	C	7.92742e-06
chrX	11092473	G	T	6.55651e-06
chrX	11092474	C	A	9.77516e-06
chrX	11092474	C	G	1.63317e-05
chrX	11092474	C	T	1.16825e-05
chrX	11092475	A	C	1.90735e-06
chrX	11092475	A	G	9.89437e-06
chrX	11092475	A	T	-3.75509e-06
chrX	11092476	A	C	-4.35114e-06
chrX	11092476	A	G	-4.05312e-06
chrX	11092476	A	T	-1.62721e-05
chrX	11092477	G	A	-8.70228e-06
chrX	11092477	G	C	-2.19345e-05
chrX	11092477	G	T	-7.27177e-06
chrX	11092478	C	A	9.53674e-07
chrX	11092478	C	G	-1.01328e-06
chrX	11092478	C	T	5.30481e-06
chrX	11092479	T	A	-5.66244e-06
chrX	11092479	T	C	-9.83477e-06
chrX	11092479	T	G	-2.12193e-05
chrX	11092480	T	A	2.38419e-07
chrX	11092480	T	C	3.57628e-06
chrX	11092480	T	G	-1.0848e-05
chrX	11092481	T	A	1.19209e-06
chrX	11092481	T	C	6.4373e-06
chrX	11092481	T	G	-2.22921e-05
chrX	11092482	T	A	-4.76837e-07
chrX	11092482	T	C	3.69549e-06
chrX	11092482	T	G	-1.69277e-05
chrX	11092483	T	A	3.57628e-07
chrX	11092483	T	C	-2.03848e-05
chrX	11092483	T	G	-1.2517e-06
chrX	11092484	G	A	4.17233e-06
chrX	11092484	G	C	1.07884e-05
chrX	11092484	G	T	1.50204e-05
chrX	11092485	T	A	1.19209e-06
chrX	11092485	T	C	-1.66893e-06
chrX	11092485	T	G	-1.66893e-06
chrX	11092486	A	C	1.20997e-05
chrX	11092486	A	G	4.94719e-06
chrX	11092486	A	T	8.9407e-06
chrX	11092487	C	A	5.48363e-06
chrX	11092487	C	G	1.14441e-05
chrX	11092487	C	T	8.28505e-06
chrX	11092488	G	A	1.35899e-05
chrX	11092488	G	C	1.57356e-05
chrX	11092488	G	T	1.47223e-05
chrX	11092489	A	C	-7.27177e-06
chrX	11092489	A	G	6.91414e-06
chrX	11092489	A	T	5.42402e-06
chrX	11092490	A	C	3.93391e-06
chrX	11092490	A	G	5.96046e-06
chrX	11092490	A	T	5.96046e-06
chrX	11092491	A	C	7.689e-06
chrX	11092491	A	G	5.00679e-06
chrX	11092491	A	T	1.51396e-05
chrX	11092492	T	A	1.81198e-05
chrX	11092492	T	C	1.23978e-05
chrX	11092492	T	G	1.78814e-06
chrX	11092493	A	C	1.5974e-05
chrX	11092493	A	G	1.83582e-05
chrX	11092493	A	T	1.16229e-05
chrX	11092494	G	A	2.30074e-05
chrX	11092494	G	C	2.58088e-05
chrX	11092494	G	T	2.28286e-05
chrX	11092495	T	A	1.07884e-05
chrX	11092495	T	C	9.53674e-06
chrX	11092495	T	G	1.71661e-05
chrX	11092496	G	A	1.64509e-05
chrX	11092496	G	C	1.09673e-05
chrX	11092496	G	T	2.06828e-05
chrX	11092497	T	A	1.00732e-05
chrX	11092497	T	C	1.83582e-05
chrX	11092497	T	G	1.29938e-05
chrX	11092498	C	A	-6.55651e-06
chrX	11092498	C	G	3.57628e-06
chrX	11092498	C	T	1.38879e-05
chrX	11092499	C	A	-4.05312e-06
chrX	11092499	C	G	1.75238e-05
chrX	11092499	C	T	-1.06096e-05
chrX	11092500	G	A	-1.3113e-06
chrX	11092500	G	C	3.69549e-06
chrX	11092500	G	T	3.09944e-06
chrX	11092501	A	C	-4.42863e-05
chrX	11092501	A	G	4.17233e-06
chrX	11092501	A	T	1.72853e-06
chrX	11092502	A	C	-4.29153e-06
chrX	11092502	A	G	4.29153e-06
chrX	11092502	A	T	3.93391e-06
chrX	11092503	G	A	1.23382e-05
chrX	11092503	G	C	1.3113e-05
chrX	11092503	G	T	1.68085e-05
chrX	11092504	A	C	1.44839e-05
chrX	11092504	A	G	-1.2815e-05
chrX	11092504	A	T	8.34465e-06
chrX	11092505	A	C	-7.27177e-06
chrX	11092505	A	G	0
chrX	11092505	A	T	6.91414e-06
chrX	11092506	A	C	2.74181e-06
chrX	11092506	A	G	-3.99351e-06
chrX	11092506	A	T	-6.91414e-06
chrX	11092507	C	A	-2.06232e-05
chrX	11092507	C	G	-3.76105e-05
chrX	11092507	C	T	-2.98023e-06
chrX	11092508	G	A	-1.43051e-06
chrX	11092508	G	C	6.02007e-06
chrX	11092508	G	T	2.68221e-06
chrX	11092509	G	A	-2.20537e-06
chrX	11092509	G	C	9.29832e-06
chrX	11092509	G	T	-3.8147e-06
chrX	11092510	T	A	4.88758e-06
chrX	11092510	T	C	6.31809e-06
chrX	11092510	T	G	5.96046e-08
chrX	11092511	T	A	1.34706e-05
chrX	11092511	T	C	-2.08616e-06
chrX	11092511	T	G	-6.91414e-06
chrX	11092512	T	A	8.22544e-06
chrX	11092512	T	C	3.45707e-06
chrX	11092512	T	G	9.29832e-06
chrX	11092513	C	A	-4.70877e-06
chrX	11092513	C	G	0
chrX	11092513	C	T	-1.83582e-05
chrX	11092514	C	A	-4.05312e-06
chrX	11092514	C	G	-3.33786e-06
chrX	11092514	C	T	-9.29832e-06
chrX	11092515	T	A	-4.23193e-06
chrX	11092515	T	C	-1.62125e-05
chrX	11092515	T	G	2.02656e-06
chrX	11092516	T	A	-2.02656e-06
chrX	11092516	T	C	3.33786e-06
chrX	11092516	T	G	-3.21865e-06
chrX	11092517	C	A	1.04308e-05
chrX	11092517	C	G	1.70469e-05
chrX	11092517	C	T	7.689e-06
chrX	11092518	T	A	3.45707e-06
chrX	11092518	T	C	-7.15256e-06
chrX	11092518	T	G	2.0504e-05
chrX	11092519	A	C	-2.28882e-05
chrX	11092519	A	G	4.64916e-06
chrX	11092519	A	T	2.26498e-06
chrX	11092520	G	A	1.04308e-05
chrX	11092520	G	C	3.57628e-07
chrX	11092520	G	T	2.26498e-06
chrX	11092521	T	A	-7.51019e-06
chrX	11092521	T	C	7.15256e-06
chrX	11092521	T	G	8.22544e-06
chrX	11092522	T	A	-5.84126e-06
chrX	11092522	T	C	-3.69549e-06
chrX	11092522	T	G	-2.26498e-06
chrX	11092523	A	C	-2.68221e-06
chrX	11092523	A	G	-1.01328e-05
chrX	11092523	A	T	-7.15256e-06
chrX	11092524	T	A	5.36442e-07
chrX	11092524	T	C	-4.8399e-05
chrX	11092524	T	G	-6.67572e-06
chrX	11092525	T	A	-5.36442e-06
chrX	11092525	T	C	-8.9407e-06
chrX	11092525	T	G	1.3113e-06
chrX	11092526	G	A	-3.09944e-06
chrX	11092526	G	C	-2.20537e-06
chrX	11092526	G	T	-2.86102e-06
chrX	11092527	A	C	5.48363e-06
chrX	11092527	A	G	1.60336e-05
chrX	11092527	A	T	3.8147e-06
chrX	11092528	A	C	-4.17233e-06
chrX	11092528	A	G	9.53674e-07
chrX	11092528	A	T	4.29153e-06
chrX	11092529	A	C	1.40667e-05
chrX	11092529	A	G	1.2517e-05
chrX	11092529	A	T	1.0252e-05
chrX	11092530	C	A	-3.51667e-06
chrX	11092530	C	G	2.02656e-06
chrX	11092530	C	T	2.86102e-06
chrX	11092531	A	C	1.4782e-05
chrX	11092531	A	G	4.52995e-06
chrX	11092531	A	T	2.86102e-06
chrX	11092532	A	C	5.48363e-06
chrX	11092532	A	G	1.33514e-05
chrX	11092532	A	T	9.47714e-06
chrX	11092533	A	C	3.69549e-06
chrX	11092533	A	G	8.40425e-06
chrX	11092533	A	T	-2.14577e-06
chrX	11092534	T	A	2.5034e-06
chrX	11092534	T	C	2.5034e-06
chrX	11092534	T	G	4.47035e-06
chrX	11092535	T	A	2.5034e-06
chrX	11092535	T	C	6.55651e-06
chrX	11092535	T	G	3.57628e-06
chrX	11092536	T	A	-4.05312e-06
chrX	11092536	T	C	7.7486e-06
chrX	11092536	T	G	7.33137e-06
chrX	11092537	T	A	7.80821e-06
chrX	11092537	T	C	1.38283e-05
chrX	11092537	T	G	1.15633e-05
chrX	11092538	A	C	-2.44379e-06
chrX	11092538	A	G	8.82149e-06
chrX	11092538	A	T	-6.55651e-06
chrX	11092539	G	A	-2.563e-06
chrX	11092539	G	C	-1.18017e-05
chrX	11092539	G	T	-6.91414e-06
chrX	11092540	T	A	6.55651e-07
chrX	11092540	T	C	1.56164e-05
chrX	11092540	T	G	1.28746e-05
chrX	11092541	C	A	4.52995e-06
chrX	11092541	C	G	5.96046e-07
chrX	11092541	C	T	-8.34465e-07
chrX	11092542	T	A	5.30481e-06
chrX	11092542	T	C	6.31809e-06
chrX	11092542	T	G	-2.08616e-06
chrX	11092543	A	C	-2.98023e-07
chrX	11092543	A	G	5.72205e-06
chrX	11092543	A	T	2.98023e-06
chrX	11092544	T	A	1.78814e-06
chrX	11092544	T	C	2.20537e-06
chrX	11092544	T	G	1.19209e-06
chrX	11092545	T	A	-1.54972e-06
chrX	11092545	T	C	1.66893e-06
chrX	11092545	T	G	5.78165e-06
chrX	11092546	G	A	-2.02656e-06
chrX	11092546	G	C	-4.70877e-06
chrX	11092546	G	T	-4.88758e-06
chrX	11092547	T	A	3.33786e-06
chrX	11092547	T	C	4.64916e-06
chrX	11092547	T	G	2.26498e-06
chrX	11092548	C	A	-7.15256e-07
chrX	11092548	C	G	4.76837e-07
chrX	11092548	C	T	-4.64916e-06
chrX	11092549	T	A	1.2517e-06
chrX	11092549	T	C	7.15256e-06
chrX	11092549	T	G	-4.76837e-07
chrX	11092550	T	A	1.13249e-06
chrX	11092550	T	C	-1.41263e-05
chrX	11092550	T	G	2.14577e-06
chrX	11092551	T	A	-2.38419e-07
chrX	11092551	T	C	8.9407e-06
chrX	11092551	T	G	7.33137e-06
chrX	11092552	C	A	-6.91414e-06
chrX	11092552	C	G	-1.43051e-06
chrX	11092552	C	T	-5.24521e-06
chrX	11092553	C	A	-4.29153e-06
chrX	11092553	C	G	3.33786e-06
chrX	11092553	C	T	-8.22544e-06
chrX	11092554	C	A	-3.03984e-06
chrX	11092554	C	G	-3.93391e-06
chrX	11092554	C	T	-8.46386e-06
chrX	11092555	A	C	9.53674e-07
chrX	11092555	A	G	-4.11272e-06
chrX	11092555	A	T	1.54972e-06
chrX	11092556	T	A	1.19209e-06
chrX	11092556	T	C	1.19209e-06
chrX	11092556	T	G	-1.90735e-06
chrX	11092557	A	C	-3.8743e-06
chrX	11092557	A	G	-3.51667e-06
chrX	11092557	A	T	-4.17233e-06
chrX	11092558	T	A	4.05312e-06
chrX	11092558	T	C	4.88758e-06
chrX	11092558	T	G	2.38419e-06
chrX	11092559	A	C	2.26498e-06
chrX	11092559	A	G	1.90735e-06
chrX	11092559	A	T	5.96046e-08
chrX	11092560	T	A	-1.19209e-07
chrX	11092560	T	C	5.126e-06
chrX	11092560	T	G	4.17233e-06
chrX	11092561	T	A	8.9407e-07
chrX	11092561	T	C	5.54323e-06
chrX	11092561	T	G	2.86102e-06
chrX	11092562	T	A	1.90735e-06
chrX	11092562	T	C	1.43051e-06
chrX	11092562	T	G	3.33786e-06
chrX	11092563	T	A	-9.53674e-07
chrX	11092563	T	C	2.98023e-06
chrX	11092563	T	G	2.38419e-06
chrX	11092564	T	A	5.96046e-07
chrX	11092564	T	C	1.07288e-06
chrX	11092564	T	G	6.91414e-06
chrX	11092565	C	A	-3.39746e-06
chrX	11092565	C	G	-1.07288e-06
chrX	11092565	C	T	-8.82149e-06
chrX	11092566	T	A	-1.19209e-07
chrX	11092566	T	C	2.38419e-07
chrX	11092566	T	G	3.57628e-07
chrX	11092567	C	A	-2.6226e-06
chrX	11092567	C	G	5.72205e-06
chrX	11092567	C	T	-3.21865e-06
chrX	11092568	T	A	-4.05312e-06
chrX	11092568	T	C	-2.92063e-06
chrX	11092568	T	G	-1.00136e-05
chrX	11092569	A	C	9.53674e-07
chrX	11092569	A	G	4.64916e-06
chrX	11092569	A	T	-5.96046e-07
chrX	11092570	A	C	-7.7486e-07
chrX	11092570	A	G	5.36442e-07
chrX	11092570	A	T	-4.05312e-06
chrX	11092571	T	A	4.52995e-06
chrX	11092571	T	C	6.4373e-06
chrX	11092571	T	G	2.86102e-06
chrX	11092572	T	A	-7.15256e-07
chrX	11092572	T	C	2.6226e-06
chrX	11092572	T	G	3.45707e-06
chrX	11092573	T	A	1.49012e-06
chrX	11092573	T	C	2.38419e-06
chrX	11092573	T	G	3.93391e-06
chrX	11092574	G	A	-9.77516e-06
chrX	11092574	G	C	-1.21593e-05
chrX	11092574	G	T	-1.34706e-05
chrX	11092575	A	C	1.78814e-06
chrX	11092575	A	G	4.76837e-07
chrX	11092575	A	T	-1.54972e-06
chrX	11092576	G	A	-5.36442e-06
chrX	11092576	G	C	0
chrX	11092576	G	T	-3.99351e-06
chrX	11092577	T	A	1.01328e-06
chrX	11092577	T	C	5.126e-06
chrX	11092577	T	G	8.64267e-06
chrX	11092578	A	C	0
chrX	11092578	A	G	5.00679e-06
chrX	11092578	A	T	-6.55651e-06
chrX	11092579	T	A	-5.72205e-06
chrX	11092579	T	C	1.90735e-06
chrX	11092579	T	G	2.86102e-06
chrX	11092580	A	C	3.57628e-07
chrX	11092580	A	G	9.53674e-07
chrX	11092580	A	T	2.26498e-06
chrX	11092581	A	C	3.57628e-06
chrX	11092581	A	G	6.73532e-06
chrX	11092581	A	T	1.07288e-06
chrX	11092582	A	C	5.96046e-08
chrX	11092582	A	G	8.34465e-07
chrX	11092582	A	T	-2.98023e-06
chrX	11092583	A	C	2.5034e-06
chrX	11092583	A	G	5.96046e-08
chrX	11092583	A	T	-7.7486e-07
chrX	11092584	T	A	2.74181e-06
chrX	11092584	T	C	8.76188e-06
chrX	11092584	T	G	3.8147e-06
chrX	11092585	T	A	-1.2517e-06
chrX	11092585	T	C	-9.65595e-06
chrX	11092585	T	G	1.3113e-06
chrX	11092586	G	A	1.90735e-06
chrX	11092586	G	C	-3.75509e-06
chrX	11092586	G	T	2.26498e-06
chrX	11092587	A	C	-2.38419e-07
chrX	11092587	A	G	5.24521e-06
chrX	11092587	A	T	2.86102e-06
chrX	11092588	A	C	-1.96695e-06
chrX	11092588	A	G	5.90086e-06
chrX	11092588	A	T	4.29153e-06
chrX	11092589	A	C	3.57628e-06
chrX	11092589	A	G	2.74181e-06
chrX	11092589	A	T	3.8147e-06
chrX	11092590	A	C	4.64916e-06
chrX	11092590	A	G	2.6226e-06
chrX	11092590	A	T	3.57628e-06
chrX	11092591	A	C	7.15256e-07
chrX	11092591	A	G	4.88758e-06
chrX	11092591	A	T	-4.64916e-06
chrX	11092592	T	A	9.53674e-07
chrX	11092592	T	C	8.9407e-07
chrX	11092592	T	G	1.19209e-06
chrX	11092593	A	C	-5.1856e-06
chrX	11092593	A	G	1.43051e-06
chrX	11092593	A	T	-3.93391e-06
chrX	11092594	T	A	3.69549e-06
chrX	11092594	T	C	3.8147e-06
chrX	11092594	T	G	-6.97374e-06
chrX	11092595	A	C	-2.0802e-05
chrX	11092595	A	G	-1.3113e-06
chrX	11092595	A	T	-3.57628e-07
chrX	11092596	G	A	1.96695e-06
chrX	11092596	G	C	2.92063e-06
chrX	11092596	G	T	5.00679e-06
chrX	11092597	A	C	3.57628e-06
chrX	11092597	A	G	2.02656e-06
chrX	11092597	A	T	-7.15256e-07
chrX	11092598	A	C	-1.3113e-06
chrX	11092598	A	G	-8.34465e-07
chrX	11092598	A	T	-9.29832e-06
chrX	11092599	T	A	1.37091e-06
chrX	11092599	T	C	-1.43051e-06
chrX	11092599	T	G	7.15256e-07
chrX	11092600	T	A	3.21865e-06
chrX	11092600	T	C	4.05312e-06
chrX	11092600	T	G	4.17233e-06
chrX	11092601	C	A	2.5034e-06
chrX	11092601	C	G	5.00679e-06
chrX	11092601	C	T	-3.57628e-06
chrX	11092602	T	A	2.08616e-06
chrX	11092602	T	C	-4.29153e-06
chrX	11092602	T	G	3.69549e-06
chrX	11092603	A	C	-8.34465e-06
chrX	11092603	A	G	-4.47035e-06
chrX	11092603	A	T	-5.60284e-06
chrX	11092604	C	A	-1.60933e-06
chrX	11092604	C	G	-4.76837e-06
chrX	11092604	C	T	5.96046e-08
chrX	11092605	A	C	1.54972e-06
chrX	11092605	A	G	-2.74181e-06
chrX	11092605	A	T	1.49012e-06
chrX	11092606	T	A	-4.70877e-06
chrX	11092606	T	C	-6.19888e-06
chrX	11092606	T	G	-6.4373e-06
chrX	11092607	G	A	6.07967e-06
chrX	11092607	G	C	1.01328e-06
chrX	11092607	G	T	2.26498e-06
chrX	11092608	A	C	-1.43051e-06
chrX	11092608	A	G	-1.3113e-06
chrX	11092608	A	T	1.3113e-06
chrX	11092609	A	C	5.24521e-06
chrX	11092609	A	G	8.34465e-07
chrX	11092609	A	T	6.3777e-06
chrX	11092610	A	C	5.96046e-06
chrX	11092610	A	G	4.29153e-06
chrX	11092610	A	T	4.88758e-06
chrX	11092611	A	C	1.13249e-06
chrX	11092611	A	G	2.98023e-06
chrX	11092611	A	T	4.05312e-06
chrX	11092612	A	C	5.00679e-06
chrX	11092612	A	G	-5.36442e-07
chrX	11092612	A	T	0
chrX	11092613	T	A	0
chrX	11092613	T	C	7.15256e-07
chrX	11092613	T	G	-2.38419e-06
chrX	11092614	T	A	-1.19209e-06
chrX	11092614	T	C	-1.60933e-06
chrX	11092614	T	G	-4.05312e-06
chrX	11092615	A	C	5.96046e-07
chrX	11092615	A	G	-4.76837e-06
chrX	11092615	A	T	-7.09295e-06
chrX	11092616	T	A	-1.13249e-06
chrX	11092616	T	C	-5.48363e-06
chrX	11092616	T	G	-3.45707e-06
chrX	11092617	G	A	2.02656e-06
chrX	11092617	G	C	-1.01328e-06
chrX	11092617	G	T	1.3113e-06
chrX	11092618	A	C	-3.33786e-06
chrX	11092618	A	G	-6.85453e-06
chrX	11092618	A	T	-1.60933e-06
chrX	11092619	C	A	-4.58956e-06
chrX	11092619	C	G	-7.7486e-07
chrX	11092619	C	T	-1.01328e-06
chrX	11092620	T	A	-1.60933e-06
chrX	11092620	T	C	2.02656e-06
chrX	11092620	T	G	-9.41753e-06
chrX	11092621	C	A	-1.3113e-06
chrX	11092621	C	G	-9.53674e-07
chrX	11092621	C	T	-3.39746e-06
chrX	11092622	T	A	1.66893e-06
chrX	11092622	T	C	6.02007e-06
chrX	11092622	T	G	1.3113e-06
chrX	11092623	T	A	3.09944e-06
chrX	11092623	T	C	5.48363e-06
chrX	11092623	T	G	7.80821e-06
chrX	11092624	T	A	4.17233e-06
chrX	11092624	T	C	5.24521e-06
chrX	11092624	T	G	6.31809e-06
chrX	11092625	T	A	6.31809e-06
chrX	11092625	T	C	1.3113e-06
chrX	11092625	T	G	4.05312e-06
chrX	11092626	T	A	2.5034e-06
chrX	11092626	T	C	-2.38419e-06
chrX	11092626	T	G	1.54972e-06
chrX	11092627	C	A	2.6226e-06
chrX	11092627	C	G	4.17233e-07
chrX	11092627	C	T	-1.19209e-07
chrX	11092628	C	A	4.76837e-07
chrX	11092628	C	G	-5.30481e-06
chrX	11092628	C	T	-1.96695e-06
chrX	11092629	T	A	1.78814e-07
chrX	11092629	T	C	2.68221e-06
chrX	11092629	T	G	-5.84126e-06
chrX	11092630	C	A	-6.55651e-07
chrX	11092630	C	G	-2.38419e-06
chrX	11092630	C	T	-2.5034e-06
chrX	11092631	C	A	-5.78165e-06
chrX	11092631	C	G	-5.72205e-06
chrX	11092631	C	T	5.96046e-07
chrX	11092632	A	C	-8.34465e-07
chrX	11092632	A	G	-2.98023e-07
chrX	11092632	A	T	1.54972e-06
chrX	11092633	T	A	-1.19209e-06
chrX	11092633	T	C	-8.9407e-07
chrX	11092633	T	G	2.14577e-06
chrX	11092634	C	A	-1.54972e-06
chrX	11092634	C	G	5.24521e-06
chrX	11092634	C	T	-1.2517e-06
chrX	11092635	A	C	4.52995e-06
chrX	11092635	A	G	-3.57628e-06
chrX	11092635	A	T	5.96046e-07
chrX	11092636	A	C	2.44379e-06
chrX	11092636	A	G	8.70228e-06
chrX	11092636	A	T	2.32458e-06
chrX	11092637	T	A	-3.27826e-06
chrX	11092637	T	C	3.57628e-06
chrX	11092637	T	G	6.55651e-06
chrX	11092638	A	C	2.26498e-06
chrX	11092638	A	G	6.55651e-06
chrX	11092638	A	T	2.02656e-06
chrX	11092639	A	C	-4.82798e-06
chrX	11092639	A	G	7.03335e-06
chrX	11092639	A	T	1.19209e-07
chrX	11092640	T	A	-2.98023e-06
chrX	11092640	T	C	3.8147e-06
chrX	11092640	T	G	1.03116e-05
chrX	11092641	A	C	0
chrX	11092641	A	G	4.88758e-06
chrX	11092641	A	T	-3.15905e-06
chrX	11092642	A	C	8.34465e-07
chrX	11092642	A	G	6.55651e-06
chrX	11092642	A	T	-1.07288e-06
chrX	11092643	A	C	2.86102e-06
chrX	11092643	A	G	5.00679e-06
chrX	11092643	A	T	-3.69549e-06
chrX	11092644	A	C	-1.19209e-06
chrX	11092644	A	G	2.38419e-06
chrX	11092644	A	T	8.34465e-07
chrX	11092645	G	A	-4.52995e-06
chrX	11092645	G	C	1.43051e-06
chrX	11092645	G	T	-1.01328e-06
chrX	11092646	C	A	-7.39098e-06
chrX	11092646	C	G	-4.76837e-06
chrX	11092646	C	T	-9.05991e-06
chrX	11092647	T	A	1.78814e-06
chrX	11092647	T	C	4.41074e-06
chrX	11092647	T	G	4.17233e-06
chrX	11092648	T	A	7.15256e-07
chrX	11092648	T	C	9.17912e-06
chrX	11092648	T	G	9.77516e-06
chrX	11092649	T	A	6.55651e-06
chrX	11092649	T	C	1.63317e-05
chrX	11092649	T	G	1.00136e-05
chrX	11092650	T	A	9.53674e-07
chrX	11092650	T	C	8.34465e-06
chrX	11092650	T	G	5.24521e-06
chrX	11092651	C	A	6.31809e-06
chrX	11092651	C	G	9.53674e-06
chrX	11092651	C	T	5.96046e-07
chrX	11092652	A	C	1.34706e-05
chrX	11092652	A	G	1.38879e-05
chrX	11092652	A	T	7.03335e-06
chrX	11092653	G	A	6.67572e-06
chrX	11092653	G	C	3.8147e-06
chrX	11092653	G	T	3.33786e-06
chrX	11092654	A	C	6.79493e-06
chrX	11092654	A	G	1.16825e-05
chrX	11092654	A	T	3.8147e-06
chrX	11092655	G	A	-1.72853e-06
chrX	11092655	G	C	-8.58307e-06
chrX	11092655	G	T	1.54972e-06
chrX	11092656	G	A	3.57628e-07
chrX	11092656	G	C	2.38419e-06
chrX	11092656	G	T	-1.01328e-06
chrX	11092657	T	A	-1.3113e-06
chrX	11092657	T	C	2.26498e-06
chrX	11092657	T	G	8.10623e-06
chrX	11092658	A	C	-3.75509e-06
chrX	11092658	A	G	5.84126e-06
chrX	11092658	A	T	-5.126e-06
chrX	11092659	A	C	-4.05312e-06
chrX	11092659	A	G	-6.55651e-07
chrX	11092659	A	T	2.02656e-06
chrX	11092660	A	C	-5.24521e-06
chrX	11092660	A	G	-3.15905e-06
chrX	11092660	A	T	1.01328e-06
chrX	11092661	T	A	-9.53674e-07
chrX	11092661	T	C	-4.64916e-06
chrX	11092661	T	G	-1.84774e-06
chrX	11092662	T	A	1.78814e-06
chrX	11092662	T	C	8.9407e-07
chrX	11092662	T	G	3.33786e-06
chrX	11092663	G	A	-3.51667e-06
chrX	11092663	G	C	2.08616e-06
chrX	11092663	G	T	-3.33786e-06
chrX	11092664	G	A	8.70228e-06
chrX	11092664	G	C	-2.5034e-06
chrX	11092664	G	T	8.52346e-06
chrX	11092665	G	A	-4.41074e-06
chrX	11092665	G	C	-2.86102e-06
chrX	11092665	G	T	-2.26498e-06
chrX	11092666	T	A	1.78814e-06
chrX	11092666	T	C	4.76837e-06
chrX	11092666	T	G	8.70228e-06
chrX	11092667	A	C	-7.15256e-07
chrX	11092667	A	G	-3.57628e-07
chrX	11092667	A	T	-4.58956e-06
chrX	11092668	T	A	-4.94719e-06
chrX	11092668	T	C	7.15256e-07
chrX	11092668	T	G	-9.17912e-06
chrX	11092669	T	A	2.26498e-06
chrX	11092669	T	C	1.07288e-06
chrX	11092669	T	G	6.79493e-06
chrX	11092670	T	A	-3.45707e-06
chrX	11092670	T	C	-2.08616e-06
chrX	11092670	T	G	-5.30481e-06
chrX	11092671	G	A	-1.78814e-06
chrX	11092671	G	C	-8.9407e-07
chrX	11092671	G	T	-7.62939e-06
chrX	11092672	T	A	1.66893e-06
chrX	11092672	T	C	-1.19209e-07
chrX	11092672	T	G	-4.29153e-06
chrX	11092673	C	A	5.36442e-07
chrX	11092673	C	G	8.58307e-06
chrX	11092673	C	T	-1.19209e-07
chrX	11092674	A	C	-8.82149e-06
chrX	11092674	A	G	-7.03335e-06
chrX	11092674	A	T	-7.98702e-06
chrX	11092675	C	A	1.66893e-06
chrX	11092675	C	G	5.84126e-06
chrX	11092675	C	T	6.31809e-06
chrX	11092676	A	C	-5.72205e-06
chrX	11092676	A	G	3.8147e-06
chrX	11092676	A	T	-1.16825e-05
chrX	11092677	A	C	3.69549e-06
chrX	11092677	A	G	-6.79493e-06
chrX	11092677	A	T	2.14577e-06
chrX	11092678	G	A	-9.17912e-06
chrX	11092678	G	C	-7.689e-06
chrX	11092678	G	T	-2.98023e-07
chrX	11092679	C	A	-5.42402e-06
chrX	11092679	C	G	-3.51667e-06
chrX	11092679	C	T	-9.65595e-06
chrX	11092680	T	A	6.07967e-06
chrX	11092680	T	C	6.31809e-06
chrX	11092680	T	G	7.51019e-06
chrX	11092681	T	A	-4.11272e-06
chrX	11092681	T	C	2.74181e-06
chrX	11092681	T	G	2.563e-06
chrX	11092682	T	A	-2.32458e-06
chrX	11092682	T	C	1.54376e-05
chrX	11092682	T	G	5.90086e-06
chrX	11092683	T	A	2.26498e-06
chrX	11092683	T	C	1.06096e-05
chrX	11092683	T	G	-3.51667e-06
chrX	11092684	G	A	-4.52995e-06
chrX	11092684	G	C	4.05312e-06
chrX	11092684	G	T	-3.57628e-06
chrX	11092685	G	A	3.69549e-06
chrX	11092685	G	C	6.55651e-06
chrX	11092685	G	T	2.6226e-06
chrX	11092686	T	A	-5.72205e-06
chrX	11092686	T	C	-2.38419e-06
chrX	11092686	T	G	-9.17912e-06
chrX	11092687	T	A	-7.39098e-06
chrX	11092687	T	C	-3.8743e-06
chrX	11092687	T	G	-7.86781e-06
chrX	11092688	C	A	-1.63317e-05
chrX	11092688	C	G	5.90086e-06
chrX	11092688	C	T	-6.31809e-06
chrX	11092689	C	A	-9.53674e-06
chrX	11092689	C	G	5.60284e-06
chrX	11092689	C	T	-5.06639e-06
chrX	11092690	A	C	-3.09944e-06
chrX	11092690	A	G	4.17233e-06
chrX	11092690	A	T	-4.41074e-06
chrX	11092691	G	A	-3.21865e-06
chrX	11092691	G	C	-4.35114e-06
chrX	11092691	G	T	-5.24521e-06
chrX	11092692	T	A	-3.15905e-06
chrX	11092692	T	C	4.41074e-06
chrX	11092692	T	G	5.126e-06
chrX	11092693	C	A	-2.02656e-06
chrX	11092693	C	G	1.0848e-05
chrX	11092693	C	T	-2.44379e-06
chrX	11092694	A	C	-5.24521e-06
chrX	11092694	A	G	-7.15256e-07
chrX	11092694	A	T	1.37091e-06
chrX	11092695	T	A	-4.17233e-07
chrX	11092695	T	C	-1.01328e-06
chrX	11092695	T	G	-8.34465e-07
chrX	11092696	G	A	-1.10269e-05
chrX	11092696	G	C	-2.6226e-06
chrX	11092696	G	T	2.5034e-06
chrX	11092697	C	A	-1.3113e-06
chrX	11092697	C	G	-4.23193e-06
chrX	11092697	C	T	-3.51667e-06
chrX	11092698	T	A	6.31809e-06
chrX	11092698	T	C	-8.70228e-06
chrX	11092698	T	G	9.0003e-06
chrX	11092699	G	A	-3.33786e-06
chrX	11092699	G	C	1.01328e-06
chrX	11092699	G	T	-3.21865e-06
chrX	11092700	G	A	-5.126e-06
chrX	11092700	G	C	5.24521e-06
chrX	11092700	G	T	-4.17233e-06
chrX	11092701	G	A	-6.55651e-06
chrX	11092701	G	C	-1.78814e-06
chrX	11092701	G	T	-2.42591e-05
chrX	11092702	A	C	-5.36442e-07
chrX	11092702	A	G	6.19888e-06
chrX	11092702	A	T	-1.70469e-05
chrX	11092703	A	C	-9.53674e-07
chrX	11092703	A	G	7.15256e-07
chrX	11092703	A	T	9.29832e-06
chrX	11092704	G	A	2.98023e-07
chrX	11092704	G	C	0
chrX	11092704	G	T	-1.2517e-06
chrX	11092705	C	A	4.17233e-07
chrX	11092705	C	G	-1.55568e-05
chrX	11092705	C	T	-8.34465e-06
chrX	11092706	T	A	4.76837e-07
chrX	11092706	T	C	-2.5034e-06
chrX	11092706	T	G	9.77516e-06
chrX	11092707	A	C	-2.08616e-06
chrX	11092707	A	G	1.09673e-05
chrX	11092707	A	T	-4.23193e-06
chrX	11092708	A	C	-5.78165e-06
chrX	11092708	A	G	-4.88758e-06
chrX	11092708	A	T	-7.15256e-06
chrX	11092709	T	A	4.17233e-07
chrX	11092709	T	C	-3.99351e-06
chrX	11092709	T	G	-5.126e-06
chrX	11092710	T	A	-1.96695e-06
chrX	11092710	T	C	4.05312e-06
chrX	11092710	T	G	2.86102e-06
chrX	11092711	T	A	-2.14577e-06
chrX	11092711	T	C	8.76188e-06
chrX	11092711	T	G	-5.96046e-07
chrX	11092712	T	A	1.07288e-06
chrX	11092712	T	C	4.29153e-06
chrX	11092712	T	G	9.53674e-07
chrX	11092713	T	A	-1.19209e-07
chrX	11092713	T	C	5.72205e-06
chrX	11092713	T	G	-5.36442e-06
chrX	11092714	T	A	-5.96046e-08
chrX	11092714	T	C	1.5974e-05
chrX	11092714	T	G	4.64916e-06
chrX	11092715	G	A	-1.18017e-05
chrX	11092715	G	C	1.49012e-06
chrX	11092715	G	T	-1.07288e-05
chrX	11092716	C	A	-7.15256e-07
chrX	11092716	C	G	-7.45058e-06
chrX	11092716	C	T	-6.07967e-06
chrX	11092717	T	A	2.38419e-07
chrX	11092717	T	C	-9.65595e-06
chrX	11092717	T	G	-5.96046e-06
chrX	11092718	G	A	-5.96046e-08
chrX	11092718	G	C	4.41074e-06
chrX	11092718	G	T	1.54972e-06
chrX	11092719	G	A	5.72205e-06
chrX	11092719	G	C	4.76837e-06
chrX	11092719	G	T	-9.89437e-06
chrX	11092720	A	C	8.34465e-07
chrX	11092720	A	G	-3.99351e-06
chrX	11092720	A	T	-9.41753e-06
chrX	11092721	A	C	5.96046e-08
chrX	11092721	A	G	-3.03984e-06
chrX	11092721	A	T	1.3113e-06
chrX	11092722	G	A	1.37091e-05
chrX	11092722	G	C	9.47714e-06
chrX	11092722	G	T	1.27554e-05
chrX	11092723	T	A	4.52995e-06
chrX	11092723	T	C	1.00136e-05
chrX	11092723	T	G	-8.9407e-06
chrX	11092724	T	A	-1.57356e-05
chrX	11092724	T	C	4.52995e-06
chrX	11092724	T	G	1.84774e-06
chrX	11092725	G	A	-1.84774e-06
chrX	11092725	G	C	1.01328e-06
chrX	11092725	G	T	-7.51019e-06
chrX	11092726	T	A	1.5974e-05
chrX	11092726	T	C	8.10623e-06
chrX	11092726	T	G	1.3113e-06
chrX	11092727	T	A	3.93391e-06
chrX	11092727	T	C	-1.13249e-06
chrX	11092727	T	G	1.3113e-06
chrX	11092728	T	A	-9.05991e-06
chrX	11092728	T	C	-3.09944e-06
chrX	11092728	T	G	-1.37091e-06
chrX	11092729	C	A	1.78814e-06
chrX	11092729	C	G	-3.8743e-06
chrX	11092729	C	T	-4.52995e-06
chrX	11092730	T	A	7.51019e-06
chrX	11092730	T	C	5.96046e-06
chrX	11092730	T	G	-1.96695e-06
chrX	11092731	G	A	3.09944e-06
chrX	11092731	G	C	2.98023e-06
chrX	11092731	G	T	3.57628e-06
chrX	11092732	T	A	-1.01328e-06
chrX	11092732	T	C	5.24521e-06
chrX	11092732	T	G	6.55651e-06
chrX	11092733	G	A	-8.9407e-07
chrX	11092733	G	C	-7.39098e-06
chrX	11092733	G	T	-8.34465e-07
chrX	11092734	C	A	-7.86781e-06
chrX	11092734	C	G	-6.4373e-06
chrX	11092734	C	T	-3.8743e-06
chrX	11092735	T	A	-8.10623e-06
chrX	11092735	T	C	1.19209e-06
chrX	11092735	T	G	-2.6226e-06
chrX	11092736	T	A	5.96046e-07
chrX	11092736	T	C	-9.77516e-06
chrX	11092736	T	G	7.62939e-06
chrX	11092737	A	C	-1.17421e-05
chrX	11092737	A	G	-7.62939e-06
chrX	11092737	A	T	-7.27177e-06
chrX	11092738	A	C	-8.10623e-06
chrX	11092738	A	G	-7.98702e-06
chrX	11092738	A	T	-4.88758e-06
chrX	11092739	A	C	-3.33786e-06
chrX	11092739	A	G	-7.39098e-06
chrX	11092739	A	T	-2.68221e-06
chrX	11092740	A	C	1.90735e-06
chrX	11092740	A	G	-1.18017e-05
chrX	11092740	A	T	-3.75509e-06
chrX	11092741	T	A	0
chrX	11092741	T	C	-7.7486e-07
chrX	11092741	T	G	-1.60933e-06
chrX	11092742	T	A	-3.39746e-06
chrX	11092742	T	C	8.34465e-07
chrX	11092742	T	G	-3.15905e-06
chrX	11092743	T	A	1.19209e-07
chrX	11092743	T	C	-1.90735e-06
chrX	11092743	T	G	6.4373e-06
chrX	11092744	T	A	2.02656e-06
chrX	11092744	T	C	6.79493e-06
chrX	11092744	T	G	4.05312e-06
chrX	11092745	A	C	-4.76837e-06
chrX	11092745	A	G	2.74181e-06
chrX	11092745	A	T	-2.563e-06
chrX	11092746	T	A	5.00679e-06
chrX	11092746	T	C	-1.01328e-06
chrX	11092746	T	G	1.78814e-06
chrX	11092747	T	A	-2.5034e-06
chrX	11092747	T	C	-6.4373e-06
chrX	11092747	T	G	3.39746e-06
chrX	11092748	A	C	-1.2517e-06
chrX	11092748	A	G	4.52995e-06
chrX	11092748	A	T	1.84774e-06
chrX	11092749	C	A	-8.70228e-06
chrX	11092749	C	G	7.15256e-07
chrX	11092749	C	T	5.96046e-07
chrX	11092750	A	C	-4.47035e-06
chrX	11092750	A	G	-3.39746e-06
chrX	11092750	A	T	-1.37091e-06
chrX	11092751	A	C	-1.01328e-06
chrX	11092751	A	G	1.72853e-06
chrX	11092751	A	T	2.98023e-06
chrX	11092752	T	A	-1.54972e-06
chrX	11092752	T	C	5.66244e-06
chrX	11092752	T	G	1.54972e-06
chrX	11092753	T	A	-4.17233e-07
chrX	11092753	T	C	-4.58956e-06
chrX	11092753	T	G	-9.89437e-06
chrX	11092754	A	C	-5.96046e-08
chrX	11092754	A	G	-4.88758e-06
chrX	11092754	A	T	6.67572e-06
chrX	11092755	T	A	-6.31809e-06
chrX	11092755	T	C	-5.84126e-06
chrX	11092755	T	G	-7.7486e-06
chrX	11092756	T	A	-5.126e-06
chrX	11092756	T	C	-1.54376e-05
chrX	11092756	T	G	9.35793e-06
chrX	11092757	A	C	-6.31809e-06
chrX	11092757	A	G	-2.98023e-06
chrX	11092757	A	T	-1.90735e-06
chrX	11092758	A	C	-1.32918e-05
chrX	11092758	A	G	-7.27177e-06
chrX	11092758	A	T	-8.10623e-06
chrX	11092759	G	A	-1.27554e-05
chrX	11092759	G	C	-8.34465e-06
chrX	11092759	G	T	-3.93391e-06
chrX	11092760	T	A	-7.7486e-06
chrX	11092760	T	C	-5.60284e-06
[truncated: 10,288 more rows]
